# Supplementary material for: Synergy between Wsp1 and Dip1 may initiate assembly of endocytic actin networks
Source: eLife. 2020 Nov 12;9:e60419. doi: 10.7554/eLife.60419 (PMC7707826; doi:10.7554/eLife.60419)
Supplement: Figure 1—source data 1. [file elife-60419-fig1-data1.xlsx]

## Sheet: Panel B
		Time Course of Fim1 Intensity in Endocytic Patches
	Time	WT Fim1 intensity		wsp1∆CA Fim1 intensity		dip1∆ Fim1 Intensity		wsp1∆CA/dip1∆ Fim1 Intensity
		Ave	SD	Ave	SD	Ave	SD	Ave	SD
	-12
	-11			-0.085987	0.0404105			0.0371116	0.132376
	-10			-0.0547309	0.0417045			-0.0356902	0.116976
	-9			-0.045937	0.0372096	-0.0793308	0.0575757	-0.01419	0.139091
	-8	-0.0285782	0.022177	-0.0154687	0.0785756	-0.102275	0.0244196	0.123519	0.241133
	-7	-0.0271017	0.0255982	0.0292557	0.0934694	-0.0556963	0.0859428	0.377191	0.344707
	-6	0.00127389	0.0621632	0.0868285	0.145436	0.0502066	0.234274	0.727322	0.374911
	-5	0.037681	0.116879	0.233598	0.17947	0.232763	0.429415	1.11143	0.493485
	-4	0.156853	0.172145	0.409509	0.174917	0.589863	0.650819	1.45065	0.540601
	-3	0.365481	0.207419	0.597403	0.185462	1.00979	0.686092	1.78329	0.535489
	-2	0.610586	0.201572	0.743004	0.215917	1.66615	0.711399	2.0299	0.609693
	-1	0.806082	0.18518	0.829146	0.227283	2.32676	0.614038	2.25004	0.6702
	0	1	0.195456	0.916427	0.224174	2.7861	0.905279	2.57141	0.812398
	1	0.878279	0.200584	0.839998	0.222082	2.3358	0.799224	2.31021	0.733599
	2	0.773475	0.233322	0.776836	0.245609	1.88995	0.825082	2.1269	0.697182
	3	0.609283	0.209272	0.658563	0.268727	1.69273	0.833524	1.90527	0.69562
	4	0.460118	0.218454	0.512505	0.247409	1.48422	0.797136	1.75124	0.828672
	5	0.369641	0.174993	0.39136	0.239811	1.30199	0.638223	1.59978	0.780005
	6	0.279577	0.1745	0.308717	0.23427	1.1769	0.546334	1.45186	0.769796
	7	0.160157	0.145114	0.204886	0.21742	0.856557	0.553499	1.30097	0.746156
	8	0.102556	0.14655	0.134856	0.181293	0.661379	0.428481	1.14144	0.71041
	9	0.0455824	0.122084	0.0987176	0.176406	0.539144	0.422566	0.936774	0.639524
	10	0.0547704	0.122271	0.0716792	0.150909	0.391402	0.253393	0.776741	0.553081
	11	0.0154822	0.124525	0.0572826	0.161638	0.319845	0.274148	0.693295	0.525201
	12	0.0538102	0.119207	0.0569094	0.184503	0.268757	0.233228	0.712642	0.453274
	13			0.0519758	0.165511	0.232957	0.216213	0.690412	0.483413
	14			0.0647529	0.154231	0.199403	0.160735	0.598356	0.497003
	15			0.0578057	0.148484	0.151437	0.121127	0.505636	0.42663
	16					0.0642751	0.136314	0.420305	0.358312
	17					0.0588603	0.0519414	0.34474	0.322175
	18							0.227215	0.292833
	19							0.239186	0.287445
	20							0.213426	0.310755
	21							0.161057	0.343406
	22							0.112598	0.227041
	23							0.145069	0.232708
	24							0.267472	0.321337
	Measured Values
		WT Fim1 intensity Biological Replicates
	Time	Average	Patch 1	Patch 2	Patch 3	Patch 4	Patch 5	Patch 6	Patch 7	Patch 8	Patch 9	Patch 10	Patch 11	Patch 12	Patch 13	Patch 14	Patch 15	Patch 16	Patch 17	Patch 18
	-10	-0.0775212	-0.0775212
	-9	-0.0583571	-0.0393776														-0.0773365
	-8	-0.0285782	-0.00708737												-0.0272644		-0.0513829
	-7	-0.0271017	-0.000178441			-0.0414787	-0.0541028								-0.0495478	0.00602962	-0.023332
	-6	0.00127389	0.115381	-0.0344843		-0.0700091	-0.0491039	-0.0585537	-0.00772322	-0.0221744	-0.0146799	0.119224	-0.019924	-0.0228077	-0.0500721	0.0123214	0.121903	0.0238563	0.0238563	-0.0453533
	-5	0.037681	0.302824	0.0242001	-0.0499886	-0.0143783	-0.0254793	-0.0141421	-0.0185403	-0.00343059	0.0162482	0.0934	-0.0734041	-0.00734041	0.103028	0.068161	0.357321	-0.00812688	-0.00812688	-0.0639664
	-4	0.156853	0.487106	0.121222	-0.021991	0.119098	0.0880342	0.0934879	0.0931537	0.162695	0.113539	0.141654	0.0555774	0.0414209	0.214707	0.225193	0.688426	0.0996199	0.0996199	0.000786473
	-3	0.365481	0.745863	0.415576	0.152871	0.394178	0.264077	0.357922	0.282552	0.411261	0.316441	0.290218	0.315376	0.214183	0.448814	0.46664	0.965526	0.204483	0.204483	0.128195
	-2	0.610586	1.03261	0.644365	0.314066	0.651603	0.519529	0.692084	0.597571	0.656258	0.526127	0.540505	0.599292	0.651462	0.699174	0.78123	1.00983	0.382488	0.382488	0.30987
	-1	0.806082	1.05892	0.913336	0.530942	1.01109	0.82731	0.957938	0.804781	0.767381	0.778618	0.827176	0.912308	1.04155	0.713331	0.891598	0.939311	0.531656	0.531656	0.470573
	0	1	1.07088	1.32872	0.913328	1.11333	0.910239	1.14405	0.873694	0.865114	0.84071	0.939926	1.08848	1.54149	0.77887	0.97575	1.05545	0.884782	0.884782	0.790405
	1	0.878279	0.802723	1.1432	0.908654	0.854244	0.892601	1.04262	0.774383	0.629678	0.642354	0.876215	0.785162	1.4631	0.751344	0.966837	1.01429	0.797745	0.797745	0.666142
	2	0.773475	0.775768	1.01787	0.903202	0.49745	0.724767	0.819026	0.694444	0.394663	0.564833	0.847092	0.811378	1.45707	0.580679	0.736925	0.989383	0.692096	0.692096	0.723817
	3	0.609283	0.644692	0.428708	0.753041	0.520869	0.637439	0.771518	0.65437	0.329902	0.415823	0.742445	0.257177	1.1881	0.462446	0.650675	0.790143	0.58566	0.58566	0.548434
	4	0.460118	0.123908	0.363039	0.664406	0.27457	0.247907	0.517524	0.558073	0.330048	0.264706	0.773046	0.19688	0.979158	0.328483	0.536112	0.636781	0.524315	0.524315	0.438852
	5	0.369641	0.0993137	0.45183	0.559264	0.211764	0.277747	0.216813	0.447459	0.255801	0.108899	0.725923	0.363088	0.604535	0.159654	0.486827	0.409752	0.466378	0.466378	0.342116
	6	0.279577	0.0382316	0.271683	0.443013	-0.0049888	0.208097	0.221319	0.333383	0.227102	0.102299	0.722467	0.258225	0.464019	0.0878228	0.450125	0.347883	0.315376	0.315376	0.230961
	7	0.160157	0.0316795	0.109412	0.211985	0.0114177	0.080228	0.159164	0.179057	0.0701147	0.0250596	0.605568	0.137108	0.348932	-0.0393236	0.221785	0.189802	0.169092	0.169092	0.202648
	8	0.102556		0.224737	0.159064		0.0470028	0.00529291	0.0727159	-0.0150393	0.0916583	0.563657	-0.00157295	0.140516	-0.0972605	0.173024	0.0804824	0.084939	0.084939	0.0267401
	9	0.0455824			0.0783104		0.015841	-0.0888862	-0.0266178	0.0321621		0.417356	0.024905	0.00734041	-0.114825	0.0901822	0.0623935	0.0526937	0.0526937	0.0346048
	10	0.0547704			0.0411143			-0.0560882	0.00673552			0.355937		-0.0188753		0.0435182		0.07655	0.07655	-0.0325075
	11	0.0154822			-0.049682							0.237723		-0.0264779		-0.0429938				-0.0411587
	12	0.0538102			0.0167558							0.187144				-0.0424695
	13	0.0895673										0.0895673
	14	0.0343059										0.0343059
	15	0.0601924										0.0601924
		wsp1∆CA Fim1 intensity Biological Replicates
	Time	Average	Patch 1	Patch 2	Patch 3	Patch 4	Patch 5	Patch 6	Patch 7	Patch 8	Patch 9	Patch 10	Patch 11	Patch 12	Patch 13	Patch 14	Patch 15	Patch 16	Patch 17	Patch 18
	-11	-0.085987					-0.114562											-0.0574125
	-10	-0.0547309					-0.114323							-0.0209726		-0.0319832		-0.051645
	-9	-0.045937					-0.0896929						-0.0503343	-0.0306724		-0.0671123		0.00812688
	-8	-0.0154687			-0.0211339		-0.192724	-0.0277966	0.0489657	0.00241775	0.00623789	0.0964536	-0.0713069	0.00262158	-0.0993577	-0.0238563		0.104339	-0.0259536
	-7	0.0292557	-0.0846463	0.0603809	-0.0214003	-0.082025	-0.0375103	0.0167558	0.0138279	-0.0477065	-0.0301791	0.0665157	0.130817	0.205794	-0.066588	0.128719	0.019924	0.214183	0.0104863
	-6	0.0868285	-0.0538339	0.0674708	-0.00371459	-0.0956745	0.1474	0.0283218	0.013363	-0.0208726	0.0359068	0.172557	0.243282	0.439638	0.0377507	0.294403	-0.0356534	0.259012	0.10329	-0.0697339
	-5	0.233598	0.101902	0.165947	0.17123	0.116839	0.17112	0.185232	0.264419	0.0654024	0.0830429	0.337756	0.36335	0.707563	0.235417	0.514353	0.0600341	0.387731	0.288635	-0.0152051
	-4	0.409509	0.329259	0.347394	0.382092	0.428987	0.350548	0.388757	0.535863	0.209515	0.231878	0.46284	0.548434	0.739809	0.344213	0.761568	0.244593	0.518548	0.475554	0.0713069
	-3	0.597403	0.588797	0.57034	0.72121	0.778095	0.426569	0.548128	0.83537	0.43533	0.407725	0.559005	0.610565	0.806921	0.441998	0.986761	0.465592	0.679512	0.662472	0.228864
	-2	0.743004	0.788382	0.831967	0.94634	0.896992	0.463479	0.637155	1.08399	0.58033	0.624081	0.71509	0.563901	0.904706	0.554201	1.16608	0.638616	0.877966	0.767597	0.333202
	-1	0.829146	0.946938	0.943103	1.10386	1.04402	0.478169	0.757999	1.22715	0.70226	0.751827	0.829305	0.637305	0.882947	0.596671	1.18784	0.710971	0.907327	0.809805	0.407131
	0	0.916427	1.00266	1.11407	1.1869	1.10245	0.638489	0.795846	1.3085	0.852399	0.864219	0.957461	0.638878	0.957924	0.683183	1.19334	0.712544	1.03395	0.959497	0.493381
	1	0.839998	0.908938	0.998007	1.17499	1.06774	0.572622	0.756883	1.23772	0.733784	0.801194	0.848677	0.489448	0.893957	0.643859	1.05414	0.703893	0.939573	0.850177	0.444357
	2	0.776836	0.932751	0.981724	1.15153	0.791476	0.405174	0.614548	1.21223	0.744139	0.807872	0.714389	0.388255	0.922795	0.594835	1.06252	0.648578	0.917027	0.667977	0.42522
	3	0.658563	0.814819	0.950391	1.09202	0.55713	0.355278	0.459639	1.10708	0.591655	0.759216	0.550829	0.0841526	0.910998	0.553939	0.833137	0.538472	0.799318	0.486564	0.40949
	4	0.512505	0.629889	0.778847	0.947209	0.366462	0.25088	0.327256	0.855229	0.521243	0.63575	0.180514	0.0629178	0.848604	0.500459	0.68292	0.463232	0.445144	0.412636	0.3159
	5	0.39136	0.358254	0.620042	0.894165	0.321364	0.126555	0.204285	0.659058	0.334401	0.478651	0.133034	0.0652772	0.818194	0.384585	0.597719	0.350242	0.224145	0.19321	0.281295
	6	0.308717	0.212935	0.528416	0.725488	0.0869183	-0.00520243	0.0727687	0.523269	0.220324	0.453916	0.1048		0.792502	0.340281	0.460349	0.245642	0.16044	0.148643	0.176694
	7	0.204886	0.00408152	0.39109	0.547793	0.00929149	-0.083631	0.0304129	0.349621	0.104511	0.344326	0.121134		0.738236	0.190064	0.329532	0.17984	0.0490235	0.0550531	0.12269
	8	0.134856	0.0150896	0.307464	0.400406	-0.0194702	-0.170796	0.0545602	0.217349	0.00614993	0.112968			0.582776	0.08992	0.24669	0.121117	0.0448289	0.0702582	0.0783851
	9	0.0987176		0.255889	0.317941	-0.0200231	-0.167297	0.0300258	0.0728642	-0.0274522	0.0498503			0.521431	0.0304103	0.136322	0.0212348			0.0621313
	10	0.0716792		0.149209	0.265676		-0.166375	0.0258513	0.0724244	-0.0586593	0.0605543			0.414209	0.0484991	0.0671123	-0.0123214			-0.00602962
	11	0.0572826		0.166015	0.147985		-0.182809		0.0766316	-0.01801				0.418666	0.00707825	0.029886	-0.0393236			-0.033294
	12	0.0569094			0.10866									0.40582	-0.0285752	0.00891336	-0.0610827			-0.0922795
	13	0.0519758			0.0286561									0.33294	-0.028313	0.0262158				-0.0996199
	14	0.0647529												0.17381	-0.0443046
	15	0.0578057												0.1628	-0.0471884
		dip1∆ Fim1 Intensity Biological Replicates
	Time	Average	Patch 1	Patch 2	Patch 3	Patch 4	Patch 5	Patch 6	Patch 7	Patch 8	Patch 9	Patch 10	Patch 11	Patch 12	Patch 13	Patch 14	Patch 15	Patch 16
	-9	-0.0793308						-0.120043			-0.0386186
	-8	-0.102275						-0.103385			-0.067413		-0.117971	-0.12033
	-7	-0.0556963		-0.147483	-0.0474678	-0.0996278	-0.0813992	0.106974	-0.034605	-0.0967527	0.00543616	-0.0592476	-0.135011	-0.164111			0.084939
	-6	0.0502066	0.0132172	-0.171512	-0.0221342	-0.0901529	-0.0521575	0.587307	-0.0147503	-0.00904268	0.585331	-0.0490235	0.0387993	-0.0618692			0.0484991	-0.0996199
	-5	0.232763	-0.0536378	-0.0204528	0.150775	-0.0737891	-0.02561	1.22487	0.014886	0.0379551	1.15922	0.00969983	0.533753	0.65854	-0.0508586	0.00943767	0.180627	-0.0311967
	-4	0.589863	0.0658246	0.558899	0.428188	0.127713	0.0356605	1.69321	0.35564	0.278594	1.82068	0.325862	1.09346	1.77166	-0.114563	-0.0238563	0.654607	0.366234
	-3	1.00979	0.514963	1.26923	0.763254	0.705035	0.450453	0.908895	0.846594	0.648595	2.2447	0.82501	1.3855	2.71726	0.370953	0.0364399	1.38026	1.08953
	-2	1.66615	1.71643	2.41854	1.18994	1.50264	1.23497	0.948247	1.61541	1.0569	2.87156	1.44868	1.5816	3.02268	1.15297	0.481059	2.42129	1.99554
	-1	2.32676	2.39206	3.10325	3.30699	2.10169	1.84462	1.60221	2.02712	1.67769	2.72947	2.17958	2.20684	2.50151	2.25849	1.23555	3.45104	2.61004
	0	2.7861	2.54003	3.71034	4.40114	2.289	2.08751	1.87617	2.2818	1.84842	3.40081	2.53061	2.28706	3.16424	2.92699	1.77953	4.83025	2.62367
	1	2.3358	2.18158	3.38391	4.01965	2.1159	1.84948	1.53962	1.71397	1.21762	2.9562	2.51855	1.47726	3.07668	2.84205	1.68331	2.9789	1.81806
	2	1.88995	1.82759	3.05703	2.9895	1.1917	1.58538	0.531472	1.34656	1.30082	2.76261	2.49417	0.6415	2.62813	2.87561	1.29008	1.90772	1.80941
	3	1.69273	1.40241	2.94244	3.15827	1.0896	1.02021	0.450083	1.03239	0.839959	2.56142	2.17224	1.28746	2.00813	2.92279	1.19308	1.60178	1.40149
	4	1.48422	0.609094	2.74898	2.36341	1.01889	0.711155	0.258176	0.56332	1.06465	2.25101	1.79971	1.04208	1.7617	2.79643	1.13619	1.68017	1.94259
	5	1.30199	1.29666	2.06559	2.09867	0.938501	0.672805	0.168287	0.525405	1.18692	1.96499	1.56167	0.546074	1.59969	2.2674	0.872198	1.72264	1.34434
	6	1.1769	1.19563	2.13092	1.6944	0.809272	0.479038	0.147065	0.595146	0.965074	1.56881	1.27068	1.01848	1.48591	1.82016	0.630489	1.41985	1.59942
	7	0.856557	1.30416	1.41983	1.64295	0.266181	0.268674	0.104536	0.289529	0.38935	0.960052	1.08795	0.433871	1.32888	1.82671	0.66588	0.529296	1.18705
	8	0.661379	0.78332	1.13764	0.88565	0.145135	0.214853	0.0903464	0.303302	0.369355	0.805042	0.431249	0.247477	1.04706	1.56298	0.807183	0.614235	1.13724
	9	0.539144	0.312611	1.16406	0.473833	0.0345874	0.161233		0.030717	0.0953854	0.764008	0.638354	0.175121	1.12806	1.09608	0.768384	0.245117	0.999607
	10	0.391402	0.245442	0.674336	0.267767	0.11754	0.148337		0.0955589	0.0803713	0.548148	0.564687	0.173024	0.578057	0.580679	0.768384	0.270809	0.757897
	11	0.319845	0.123898	0.540666	0.107683		-0.0322325		0.000291537	0.0539419	0.283128	0.484467		0.623149	0.435182	0.753179	0.126884	0.657753
	12	0.268757	0.127565	0.666354	0.0569		-0.0298172		-0.0174922		0.274244	0.337921		0.403723	0.185608	0.467951	0.13973	0.6124
	13	0.232957	0.0947898	0.745368	0.115424						0.095971	0.190326		0.218902	0.1434	0.122165	0.108271	0.494953
	14	0.199403	0.0847845	0.489049							0.0744802	0.309608		0.115874	0.0193997	0.175646		0.326386
	15	0.151437		0.316353							0.011943			0.0720933	0.132127			0.224669
	16	0.0642751		0.23034							-0.0872777				0.00655394			0.107485
	17	0.0588603		0.119025							0.00657215				0.0256914			0.0841526
	18	0.149204		0.149204
		wsp1∆CA/dip1∆ Fim1 Intensity Biological Replicates
	Time	Average	Patch 1	Patch 2	Patch 3	Patch 4	Patch 5	Patch 6	Patch 7	Patch 8	Patch 9	Patch 10	Patch 11	Patch 12	Patch 13	Patch 14	Patch 15	Patch 16	Patch 17	Patch 18
	-13	-0.0668502											-0.0668502
	-12	-0.0634421											-0.0634421
	-11	0.0371116						-0.104426	0.195549	0.0890445			-0.0317211
	-10	-0.0356902	-0.0010053	0.00486063		0.138194		-0.119663	0.158677	0.0659402	-0.173515		0.0188753	-0.11299		-0.1725	-0.150741			-0.0844147
	-9	-0.01419	0.00810524	-0.0017065	-0.0787678	0.131234	-0.183498	-0.0834199	0.233132	0.240116	-0.168536	-0.0862523	0.234369	-0.109582	-0.0925416	-0.151003	-0.0878228	-0.0319832	0.0673745	-0.0946389
	-8	0.123519	0.453265	0.239897	-0.0740203	0.382251	-0.237442	0.338945	0.42101	0.483891	-0.0985722	-0.105069	0.404771	0.0621313	-0.135273	-0.0922795	0.00235942	-0.0867742	0.0684231	0.195832
	-7	0.377191	1.07599	0.546833	-0.0361305	0.623834	-0.0555755	0.87483	0.718478	0.612045	0.470134	0.042112	0.661686	0.272906	0.00157295	0.0521694	0.14943	0.159916	0.0893957	0.52982
	-6	0.727322	1.62048	0.786419	0.371733	0.921439	0.358201	1.33125	0.939881	0.877286	1.0979	0.623875	0.84572	0.551317	0.494429	0.177481	0.434657	0.640189	0.266876	0.752654
	-5	1.11143	2.23268	1.00252	0.834827	1.28019	0.698588	2.06652	1.30012	1.11934	1.65345	1.11389	1.21379	0.759733	0.814261	0.25639	0.576747	1.21169	0.789881	1.08114
	-4	1.45065	2.80589	1.12114	1.25716	1.50039	0.854445	2.26009	1.44941	1.3155	1.94753	1.704	1.50242	1.32285	1.24184	0.444619	0.917027	1.86551	1.48355	1.11836
	-3	1.78329	2.83322	1.19862	1.68811	1.61823	1.10457	2.48136	1.49057	1.84939	2.30743	2.14347	1.8642	1.97378	1.60152	0.761568	1.07511	2.26871	2.0894	1.7499
	-2	2.0299	2.74372	1.38448	2.01811	1.86629	1.21258	2.46074	1.59015	2.23105	2.58811	2.76438	2.15494	2.71228	1.90772	0.680299	1.38786	2.70783	2.40739	1.72028
	-1	2.25004	2.8866	1.53064	2.06941	1.86151	1.62802	2.67247	1.58908	2.38709	3.00634	3.61275	2.42417	3.06515	1.95412	1.4222	1.2442	2.87325	2.442	1.83169
	0	2.57141	3.15419	1.62243	2.1278	2.16105	1.73766	2.78257	1.62315	2.47533	3.57106	4.51505	2.45982	3.42116	2.4787	3.29453	1.43505	3.01219	2.49993	1.91375
	1	2.31021	2.87513	1.57653	2.03194	1.78872	1.518	2.70983	1.51889	2.428	2.80563	4.46106	2.12112	3.05204	2.42103	2.31066	1.42011	2.45851	2.25298	1.83353
	2	2.1269	2.42048	1.54375	1.97212	1.59586	1.05626	2.58568	1.45821	2.20796	2.44318	4.09181	1.85345	2.9844	2.55132	2.04509	1.43662	2.25482	2.17355	1.60965
	3	1.90527	2.18389	1.55217	1.74215	1.39901	1.24513	2.64866	1.46006	1.95572	2.39881	3.95833	1.61174	2.7579	1.87862	1.62852	0.998296	1.50819	1.93315	1.43453
	4	1.75124	1.90649	1.45117	1.6906	1.04925	1.19706	2.59102	1.25572	1.64582	2.29139	4.26229	1.34828	2.62629	1.59549	2.10277	0.613711	1.01717	1.65474	1.22297
	5	1.59978	1.81718	1.47472	1.59309	0.945267	1.01994	2.49145	1.30645	1.38353	1.76954	3.78508	1.09189	2.35889	1.83222	2.17329	0.440163	0.650937	1.62852	1.03395
	6	1.45186	1.48018	1.30864	1.41387	0.735259	0.772481	2.37229	1.25185	1.1248	1.74931	3.63562	0.87246	1.97955	1.54883	2.25875	0.358894	0.730109	1.56062	0.979945
	7	1.30097	0.794565	1.26337	1.24894	0.641721	0.545753	2.28273	1.08431	1.00435	1.92924	3.06821	0.731157	1.96644	1.32075	2.33766	0.310132	0.781492	1.48093	0.62577
	8	1.14144	0.501394	1.11726	1.26534	0.51587	0.575879	2.20498	1.03915	0.850105	1.71764	2.38204	0.670337	2.01625	0.676366	2.3159	0.317211	0.707825	1.43138	0.240923
	9	0.936774	0.239136	0.897075	1.08055	0.411816	0.666987	2.00921	1.07215	0.689536	1.58521	1.5326	0.480797	2.10565	0.548696	1.71844	0.184559	0.433084	1.20016	0.00629178
	10	0.776741	0.247585	0.916797	0.969668	0.346789	0.588634	1.81222	1.09056	0.556974	1.07651	0.813404	0.341853	1.91716	0.322978	1.3218	0.163848	0.377769	1.15428	-0.0374885
	11	0.693295	0.226384	0.751756	0.858952	0.288353	0.51107	1.66435	1.40892	0.370003	0.871711	0.682886	0.309346	1.71503	0.253506	1.20645	0.1725	0.267401	0.930659	-0.00996199
	12	0.712642		0.698875	0.706075	0.215871	0.476354	1.52745	1.41426	0.269473	0.640143	0.652518	0.280771	1.45026	0.308822	1.03762		0.253506	0.757635
	13	0.690412		0.554232	0.516262		0.427818	1.41174	1.3959	0.213237	0.52303	0.739419	0.198191	1.60362	0.182724	1.00249		0.229912	0.667191
	14	0.598356		0.495025	0.451569		0.312556	1.0882	1.40967	0.0584582	0.370179	0.738459	0.144711	1.65212	0.0589855	0.810067		0.169878	0.617119
	15	0.505636		0.475593	0.352986		0.32292	0.713575	1.32781	0.0271431	0.329515	0.593987	0.143924	1.3682	0.0086512	0.756849		0.136322	0.521431
	16	0.420305		0.413907	0.338286		0.129621	0.571169	1.21389	0.0868278	0.0955664	0.377644		0.956089	0.0175646	0.440425			0.402674
	17	0.34474		0.426868	0.232131		0.0724445	0.420424	0.9749	0.0492648	-0.0338485	0.157749		0.867217		0.291257			0.333727
	18	0.227215		0.308549	0.139787		0.00964335	0.268182	0.984556	0.0310563	-0.0950663	0.0908239		0.426268		0.0870363			0.248525
	19	0.239186		0.29301	0.0652465			0.0859331	0.920096			0.0547738		0.169354		0.101455			0.22362
	20	0.213426		0.161122	-0.00468219			0.0348613	0.82972					0.0713069					0.188229
	21	0.161057		0.103913	-0.0753247			-0.0792453	0.829559					0.00209726					0.185345
	22	0.112598		0.0927666	-0.0434818			-0.110478	0.527843					0.0314589					0.177481
	23	0.145069		0.0553242				-0.0928848	0.457394										0.16044
	24	0.267472		0.0402522					0.494691
	25	0.40773							0.40773
	26	0.405428							0.405428
	27	0.37547							0.37547
	28	0.354331							0.354331
	29	0.337959							0.337959
	30	0.306335							0.306335
	31	0.294043							0.294043

## Sheet: Panel C
	Fim1 Assembly Time
	WT	Wsp1CA	Dip1	Wsp1CA/Dip1
	8.5	5.5	4.5	8.5
	4.5	5.5	5.5	8.5
	3.5	6.5	5.5	7.5
	5.5	5.5	5.5	8.5
	5.5	9.5	5.5	7.5
	4.5	6.5	7.5	9.5
	4.5	6.5	5.5	9.5
	4.5	6.5	5.5	9.5
	4.5	5.5	7.5	8.5
	4.5	6.5	5.5	7.5
	4.5	7.5	6.5	11.5
	4.5	8.5	6.5	8.5
	6.5	6.5	3.5	7.5
	5.5	8.5	3.5	8.5
	7.5	5.5	5.5	8.5
	4.5	9.5	4.5	7.5
	4.5	6.5		7.5
	4.5	4.5		8.5

## Sheet: Panel D
	Measured Values						Pixel Correction Factor
							225 pixels/µm²
		New Patches	Time	Area	patches/second/um2
	WT	18	20	7132	0.0283932
		21	20	8791	0.0268741
		15	20	6309	0.0267475
		17	20	6646	0.0287767
		19	20	5337	0.0400506
		19	20	9309	0.0229617
		23	20	6783	0.0381468
		19	20	6409	0.0333515
		18	20	6807	0.0297488
		21	20	10172	0.0232255
	avg				0.0298276
	Wsp1CA	13	20	8532	0.0171414
		15	20	7831	0.021549
		15	20	9353	0.0180423
		12	20	9616	0.0140391
		15	20	8538	0.0197646
		11	20	8865	0.0139594
		11	20	7854	0.0157563
		16	20	9827	0.0183169
		14	20	6305	0.0249802
		11	20	6588	0.0187842
	avg				0.0182333
	Dip1	7	20	7931	0.00992939
		5	20	7918	0.00710407
		4	20	6493	0.00693054
		4	20	7640	0.00589005
		7	20	9650	0.00816062
		3	20	10055	0.00335654
		5	20	6891	0.00816282
		5	20	6204	0.00906673
		3	20	9330	0.00361736
		8	20	7174	0.0125453
	avg				0.00747634
	Wsp1CA/Dip1	3	20	8891	0.00379597
		5	20	8255	0.00681405
		8	20	8141	0.0110552
		5	20	8016	0.00701722
		8	20	8137	0.0110606
		4	20	9193	0.0049
		3	20	9077	0.00372
		7	20	8602	0.00915
		3	20	10178	0.00332
		4	20	7414	0.00607
	avg				0.0066903

## Sheet: Panel E
	Measured Values
						Pixel Correction Factor
		Area (pixels)	Patch Count	Patches/µm²		225 pixels/µm²
	WT
	1	5635	26	1.03815
	2	6633	33	1.1194
	3	7039	39	1.24663
	4	7081	34	1.08036
	5	5806	38	1.47261
	6	6383	29	1.02225
	7	5105	34	1.49853
	8	6967	41	1.3241
	9	7266	35	1.08382
	10	8844	47	1.19573
	avg			1.20816
	Wsp1CA
	1	7621	38	1.1219
	2	7776	37	1.0706
	3	6112	31	1.1412
	4	6868	40	1.31043
	5	7935	37	1.04915
	6	5841	30	1.15562
	7	6290	34	1.21622
	8	5521	31	1.26336
	9	9598	38	0.890811
	10	5957	32	1.20866
	avg			1.14279
	Dip1
	1	6558	7	0.240165
	2	8375	12	0.322388
	3	6596	16	0.545785
	4	8606	13	0.339879
	5	7914	13	0.369598
	6	7140	11	0.346639
	7	6245	14	0.504404
	8	7698	9	0.263055
	9	8597	12	0.314063
	10	7390	14	0.426252
	avg			0.367223
	Wsp1CA/Dip1
	1	8099	13	0.361156
	2	7344	17	0.520833
	3	9538	17	0.401027
	4	9239	16	0.389653
	5	7700	19	0.555195
	6	6040	12	0.44702
	7	9035	15	0.373547
	8	9401	17	0.406872
	9	6333	15	0.532923
	10	6961	16	0.517167
	avg			0.450539

## Sheet: Panel F
	Measured Values
	Strain	cell #	Total Patches analyzed	internalized	not intern.	%
	WT	1	12	12	0	100
		2	12	12	0	100
		3	10	10	0	100
		4	12	12	0	100
		5	14	14	0	100
		6	16	15	1	93.75
		7	10	10	0	100
		8	12	11	1	91.6667
		9	13	13	0	100
		10	12	12	0	100
		total	123	121	2	98.374
	Wsp1CA	1	15	5	10	33.3333
		2	12	6	6	50
		3	12	7	5	58.3333
		4	7	4	3	57.1429
		5	14	6	8	42.8571
		6	12	6	6	50
		7	10	2	8	20
		8	8	1	7	12.5
		9	13	5	8	38.4615
		10	15	7	8	46.6667
		total	118	49	38	41.5254
	Dip1	1	6	6	0	100
		2	4	3	1	75
		3	3	3	0	100
		4	10	9	1	90
		5	5	4	1	80
		6	5	5	0	100
		7	4	3	1	75
		8	5	5	0	100
		9	5	5	0	100
		10	2	2	0	100
		11	4	4	0	100
		12	8	8	0	100
		13	6	6	0	100
		14	6	6	0	100
		15	8	8	0	100
		16	8	7	1	87.5
		17	3	3	0	100
		18	5	5	0	100
		19	3	3	0	100
		20	4	3	1	75
		21	4	4	0	100
		22	4	4	0	100
		total	112	106	4	94.6429
	Wsp1CA/Dip1	1	5	2	3	40
		2	5	4	1	80
		3	9	8	1	88.8889
		4	3	3	0	100
		5	4	2	2	50
		6	6	3	3	50
		7	2	1	1	50
		8	3	0	3	0
		9	8	3	5	37.5
		10	3	1	2	33.3333
		1	6	5	1	83.3333
		2	6	2	4	33.3333
		3	5	2	3	40
		4	5	4	1	80
		5	5	5	0	100
		6	6	5	1	83.3333
		7	3	2	1	66.6667
		8	2	2	0	100
		9	4	3	1	75
		10	3	2	1	66.6667
		total	60	34	26	56.6667
