# Supplementary material for: Synergy between Wsp1 and Dip1 may initiate assembly of endocytic actin networks
Source: eLife. 2020 Nov 12;9:e60419. doi: 10.7554/eLife.60419 (PMC7707826; doi:10.7554/eLife.60419)
Supplement: Figure 2—source data 1. [file elife-60419-fig2-data1.xlsx]

## Sheet: Panel A
	Fluorescence data from actin polymerization time courses
	Time (sec)	10nM Arp2/3	+ 0.25uM Dip1	+ 1uM Dip1	+ 30uM Dip1	10nM Arp2/3 + 1uM VCA	+ 0.25uM Dip1 + 1uM VCA	+ 1uM Dip1 + 1uM VCA	+ 30uM Dip1 + 1uM VCA
	0	656	697	692	900
	10	680	695	722	1093
	21	671	710	770	1436
	30	714	740	826	1870
	40	725	779	885	2384
	50	748	802	971	2955
	61	782	820	1065	3639
	70	826	863	1207	4205
	80	885	904	1330	4725
	91	921	956	1506	5319
	100	945	1005	1685	5743
	110	997	1080	1855	6158
	120	1022	1134	2074	6544
	131	1086	1239	2293	6918
	140	1145	1307	2501	7212
	150	1184	1408	2746	7495
	161	1240	1496	2990	7769
	170	1308	1583	3204	7994
	180	1377	1658	3406	8171
	190	1409	1772	3623	8337
	201	1495	1898	3859	8502
	210	1539	1987	4084	8631
	220	1574	2105	4333	8734
	230	1624	2215	4493	8873
	240	1678	2318	4750	8859
	250	1771	2437	4912	8969
	260	1835	2558	5095	9064
	271	1890	2635	5298	9116
	280	1960	2757	5515	9158
	290	2001	2890	5668	9161
	300	2085	2984	5842	9220
	310	2156	3113	5983	9241
	320	2256	3243	6226	9260
	330	2280	3351	6314	9250
	341	2339	3498	6500	9273
	350	2413	3615	6649	9285
	360	2490	3710	6757	9339
	370	2571	3826	6913	9294
	381	2646	3927	7011	9329
	390	2676	4042	7146	9335
	400	2789	4162	7266	9338
	411	2820	4260	7390	9304
	420	2862	4366	7523	9297
	430	2955	4439	7535	9354
	440	3034	4541	7673	9265
	451	3091	4688	7786	9294
	460	3172	4773	7856	9365
	470	3246	4867	8024	9339
	481	3311	4960	8137	9307
	490	3373	5055	8145	9303
	500	3443	5137	8222	9365
	510	3491	5217	8306	9303
	521	3560	5344	8332	9328
	530	3606	5411	8452	9296
	540	3724	5503	8416	9260
	550	3748	5609	8524	9333
	560	3800	5648	8630	9325
	570	3896	5739	8599	9307
	580	3948	5841	8712	9281
	591	4022	5943	8684	9340
	600	4090	6000	8821	9291
	610	4195	6068	8854	9369
	620	4220	6154	8915	9265
	630	4299	6267	8975	9304
	640	4354	6314	8962	9298
	650	4362	6347	9022	9316
	661	4460	6454	9068	9315
	670	4562	6486	9150	9286
	680	4578	6580	9145	9289
	690	4613	6679	9170	9247
	701	4724	6706	9189	9264
	710	4767	6809	9281	9301
	720	4832	6839	9281	9230
	731	4868	6919	9298	9269
	740	4903	6996	9362	9266
	750	5004	7013	9327	9261
	760	5056	7093	9338	9235
	771	5096	7098	9365	9288
	780	5119	7210	9393	9284
	790	5204	7282	9413	9271
	801	5233	7306	9451	9304
	810	5284	7348	9469	9283
	820	5344	7366	9535	9256
	830	5410	7427	9561	9275
	841	5440	7504	9479	9239
	850	5500	7541	9533	9306
	860	5596	7558	9576	9332
	870	5584	7641	9499	9236
	880	5633	7700	9574	9285
	890	5680	7732	9553	9275
	900	5700	7693	9572	9255
	911	5810	7821	9577	9298
	920	5835	7822	9601	9313
	930	5887	7892	9572	9296
	940	5909	7883	9583	9301
	950	5925	7969	9611	9297
	960	5962	7973	9572	9360
	970	6048	8023	9572	9309
	981	6061	8023	9632	9365
	990	6104	8083	9571	9286
	1000	6161	8074	9582	9305
	0					794	853	1053	1762
	10					829	980	1370	2605
	20					833	1194	1945	3695
	30					895	1464	2580	4710
	40					923	1832	3314	5665
	50					994	2255	4037	6474
	60					1079	2769	4723	7054
	70					1111	3252	5387	7590
	80					1131	3785	6006	8103
	90					1188	4279	6500	8446
	100					1300	4784	7028	8797
	110					1318	5258	7455	9067
	120					1390	5718	7837	9356
	130					1456	6128	8176	9548
	140					1540	6562	8490	9683
	150					1617	6918	8722	9792
	160					1668	7365	8954	9768
	170					1736	7672	9130	9767
	180					1844	7943	9354	9729
	190					1937	8258	9443	9713
	200					1982	8527	9551	9772
	210					2107	8718	9678	9795
	220					2163	8959	9768	9790
	230					2265	9136	9840	9747
	240					2318	9297	9870	9730
	250					2405	9451	9942	9730
	260					2491	9643	9946	9746
	270					2589	9665	9953	9799
	280					2657	9821	10047	9809
	290					2759	9922	10063	9708
	300					2876	10069	10051	9745
	310					2934	10145	9986	9755
	320					3068	10202	10036	9771
	330					3191	10242	10063	9793
	340					3283	10352	10038	9787
	350					3376	10385	10006	9761
	360					3500	10427	10065	9727
	370					3608	10472	9972	9772
	380					3714	10455	9971	9763
	390					3858	10551	9993	9742
	400					3989	10515	10038	9818
	410					4089	10515	9999	9799
	420					4227	10514	9967	9830
	430					4327	10477	9982	9818
	440					4468	10545	9966	9771
	450					4602	10531	9991	9803
	460					4733	10569	9997	9835
	470					4857	10508	9952	9809
	480					5005	10520	10004	9781
	490					5055	10545	10013	9718
	500					5237	10573	9932	9781
	510					5364	10548	9925	9734
	520					5482	10491	9983	9750
	530					5588	10519	9988	9802
	540					5704	10521	10008	9763
	550					5868	10508	9999	9837
	560					6042	10424	9947	9761
	570					6131	10508	9984	9806
	580					6239	10536	9968	9765
	590					6331	10480	9931	9749
	600					6456	10548	9992	9799
	610					6631	10494	9943	9793
	620					6704	10484	10003	9767
	630					6813	10486	9951	9832
	640					6898	10524	9961	9827
	650					7032	10472	9990	9766
	660					7162	10542	9956	9800
	670					7277	10507	9946	9787
	680					7351	10448	9973	9731
	690					7470	10468	9959	9768
	700					7556	10491	9952	9798
	710					7704	10534	9959	9828
	720					7783	10509	10033	9778
	730					7842	10469	9956	9718
	740					7937	10487	9984	9813
	750					8029	10483	9984	9795
	760					8151	10528	9975	9735
	770					8308	10458	9995	9770
	780					8308	10519	10009	9834
	790					8375	10438	9992	9828
	800					8461	10474	10002	9824
	810					8526	10470	10015	9820
	820					8600	10423	10040	9800
	830					8708	10484	10048	9777
	840					8797	10410	10077	9742
	850					8774	10463	10058	9752
	860					8875	10373	10017	9770
	870					8956	10377	10142	9795
	880					9015	10408	10071	9796
	890					9012	10334	10074	9807
	900					9130	10382	10058	9791
	910					9179	10378	10051	9778
	920					9203	10308	10025	9793
	930					9306	10341	10069	9770
	940					9319	10273	10092	9795
	950					9364	10248	10142	9802
	960					9368	10261	10105	9794
	970					9476	10323	10108	9762
	980					9527	10317	10163	9790
	990					9576	10294	10137	9720
	1000					9562	10319	10169	9744

## Sheet: Panel B
	Maximum Polymerization Rates
	[Dip1] (µM)	Dip1 Alone	Dip1 and Wsp1-VCA
	0	2.82	4.32
	0.05	3.05	8.24
	0.1	3.26	10.64
	0.25	4.12	15.11
	0.5	5.38	19.84
	1	7.49	21.47
	5	12.98	27.59
	10	16.31	31.39
	20	19.07	31.91
	30	20.32	35.59
	40	21.01	33.29

## Sheet: Panel D
	% Pointed Ends Bound by Dip1
	100 nM Arp2/3 + 6 nM Dip1-568	+ 1 µM VCA	+ 1 µM GST-VCA
	1.9	44.3	0.8
	6.3	26.7	3.1
	2.7	38.4	6.3
	2	36.4	2.8
	5.2	43.5	1.4
	2.3	26.3	18.2
		53.8	21.2
		54.4	8.5
		41.7
	Measured Values
		Total filaments counted	Pointed ends bound	% Bound
	100 nM Arp2/3 + 6 nM Dip1-568	162	3	1.9
		111	7	6.3
		183	5	2.7
		148	3	2
		77	4	5.2
		43	1	2.3
	+ 1 µM VCA	131	58	44.3
		135	36	26.7
		203	78	38.4
		77	28	36.4
		115	50	43.5
		38	10	26.3
		39	21	53.8
		79	43	54.4
		12	5	41.7
	+ 1 µM GST-VCA	123	1	0.8
		64	2	3.1
		79	5	6.3
		71	2	2.8
		70	1	1.4
		22	4	18.2
		33	7	21.2
		47	4	8.5

## Sheet: Panel F
	% Pointed Ends Bound by Dip1
	250 nM Arp2/3 + 6 nM Dip1-568	250nM GST-VCA
	0	67.9
	12.1	66.1
	2.2	55.1
	5.9	56.5
	5.7
	Measured Values
		Total filaments counted	Pointed ends bound	% Bound
	250 nM Arp2/3 + 6 nM Dip1-568	23	0	0
		58	7	12.1
		45	1	2.2
		34	2	5.9
		35	2	5.7
	250nM GST-VCA	56	38	67.9
		62	41	66.1
		49	27	55.1
		23	13	56.5

## Sheet: Panel G
	Fluorescence data from actin polymerization time courses
	Time (sec)	10nM Arp2/3	+ 0.1uM Dip1	+ 0.5uM Dip1	+ 20uM Dip1	10nM Arp2/3 + 200nM GST-VCA	+ 0.1uM Dip + 200nM GST-VCA	+ 0.5uM Dip + 200nM GST-VCA	+ 20uM Dip + 200nM GST-VCA
	0	656	673	679	892
	10	680	696	709	1081
	21	671	705	719	1419
	30	714	724	753	1855
	40	725	756	800	2321
	50	748	777	874	2907
	61	782	835	912	3501
	70	826	879	988	4051
	80	885	914	1057	4594
	91	921	960	1202	5185
	100	945	1010	1276	5608
	110	997	1078	1375	6067
	120	1022	1140	1496	6500
	131	1086	1209	1643	6926
	140	1145	1238	1773	7177
	150	1184	1326	1914	7460
	161	1240	1405	2092	7747
	170	1308	1456	2230	7983
	180	1377	1518	2360	8200
	190	1409	1552	2528	8376
	201	1495	1658	2688	8520
	210	1539	1731	2867	8675
	220	1574	1804	2996	8763
	230	1624	1867	3170	8838
	240	1678	1918	3320	9007
	250	1771	2009	3455	9074
	260	1835	2080	3660	9181
	271	1890	2169	3846	9204
	280	1960	2212	3949	9249
	290	2001	2323	4117	9318
	300	2085	2365	4281	9348
	310	2156	2469	4437	9398
	320	2256	2545	4605	9441
	330	2280	2613	4732	9423
	341	2339	2710	4852	9424
	350	2413	2779	5010	9502
	360	2490	2888	5184	9493
	370	2571	2956	5272	9490
	381	2646	3071	5418	9443
	390	2676	3149	5556	9438
	400	2789	3222	5705	9458
	411	2820	3298	5818	9469
	420	2862	3392	5955	9460
	430	2955	3511	6012	9493
	440	3034	3550	6148	9454
	451	3091	3634	6256	9440
	460	3172	3744	6360	9437
	470	3246	3808	6458	9438
	481	3311	3896	6575	9485
	490	3373	3929	6669	9463
	500	3443	4013	6746	9485
	510	3491	4099	6880	9529
	521	3560	4215	7003	9518
	530	3606	4262	7041	9473
	540	3724	4344	7065	9522
	550	3748	4404	7229	9485
	560	3800	4468	7263	9468
	570	3896	4542	7376	9508
	580	3948	4679	7470	9474
	591	4022	4750	7533	9494
	600	4090	4764	7589	9532
	610	4195	4857	7689	9517
	620	4220	4905	7697	9492
	630	4299	4990	7778	9496
	640	4354	5043	7784	9540
	650	4362	5120	7929	9512
	661	4460	5202	7965	9473
	670	4562	5270	8013	9450
	680	4578	5335	8037	9452
	690	4613	5319	8091	9475
	701	4724	5463	8159	9501
	710	4767	5525	8269	9470
	720	4832	5575	8289	9487
	731	4868	5630	8358	9477
	740	4903	5636	8331	9504
	750	5004	5727	8406	9469
	760	5056	5799	8497	9487
	771	5096	5892	8510	9496
	780	5119	5941	8554	9500
	790	5204	5934	8621	9462
	801	5233	5978	8629	9453
	810	5284	6108	8699	9415
	820	5344	6076	8687	9477
	830	5410	6181	8763	9503
	841	5440	6251	8788	9453
	850	5500	6246	8806	9480
	860	5596	6325	8801	9474
	870	5584	6366	8833	9492
	880	5633	6456	8913	9495
	890	5680	6463	8948	9441
	900	5700	6511	8934	9454
	911	5810	6595	8961	9449
	920	5835	6624	8961	9438
	930	5887	6687	9039	9459
	940	5909	6668	9106	9421
	950	5925	6739	9080	9477
	960	5962	6807	9110	9440
	970	6048	6780	9175	9480
	981	6061	6867	9194	9462
	990	6104	6923	9205	9461
	1000	6161	6971	9159	9464
	0					761	786	741	841
	10					772	856	792	965
	20					790	880	859	1156
	30					831	904	991	1401
	40					867	960	1147	1722
	50					895	1042	1360	2116
	60					966	1102	1576	2624
	70					994	1225	1875	3092
	80					1068	1364	2146	3614
	90					1115	1480	2478	4107
	100					1170	1614	2804	4606
	110					1232	1791	3196	5099
	120					1282	1931	3524	5581
	130					1397	2128	3856	5999
	140					1470	2287	4193	6430
	150					1550	2467	4550	6806
	160					1623	2664	4883	7099
	170					1703	2859	5218	7421
	180					1801	3058	5576	7681
	190					1940	3225	5876	7982
	200					2027	3465	6164	8143
	210					2143	3673	6438	8419
	220					2292	3897	6744	8548
	230					2397	4088	6942	8753
	240					2510	4304	7213	8843
	250					2629	4447	7347	9043
	260					2743	4642	7630	9158
	270					2879	4870	7774	9179
	280					2991	5048	8008	9314
	290					3168	5275	8168	9444
	300					3293	5426	8317	9438
	310					3449	5639	8464	9508
	320					3565	5839	8592	9584
	330					3651	5976	8794	9541
	340					3799	6161	8913	9604
	350					3961	6315	8960	9611
	360					4077	6517	9084	9592
	370					4299	6571	9204	9640
	380					4458	6785	9283	9615
	390					4573	6885	9344	9609
	400					4722	7028	9469	9574
	410					4844	7185	9501	9568
	420					5008	7323	9559	9553
	430					5118	7429	9660	9564
	440					5266	7544	9667	9495
	450					5378	7630	9701	9503
	460					5535	7751	9810	9496
	470					5629	7859	9826	9543
	480					5800	7952	9845	9474
	490					5916	8092	9782	9567
	500					6047	8201	9869	9473
	510					6183	8236	9941	9543
	520					6276	8349	9914	9547
	530					6412	8433	9938	9557
	540					6527	8494	9960	9515
	550					6614	8566	9932	9516
	560					6758	8608	9957	9527
	570					6825	8673	9999	9572
	580					6910	8763	9975	9603
	590					7030	8784	9957	9562
	600					7126	8896	9985	9556
	610					7212	8931	10030	9563
	620					7348	8969	9957	9571
	630					7445	9036	10000	9602
	640					7492	9054	10030	9536
	650					7618	9090	9987	9584
	660					7712	9133	9999	9522
	670					7765	9201	9930	9463
	680					7840	9259	9983	9525
	690					7924	9209	9967	9515
	700					7977	9338	9986	9533
	710					8099	9338	10004	9545
	720					8174	9358	9980	9552
	730					8255	9385	9962	9503
	740					8275	9360	9999	9520
	750					8348	9454	9941	9465
	760					8411	9443	10003	9524
	770					8454	9496	9929	9518
	780					8494	9492	9973	9570
	790					8595	9501	9929	9611
	800					8656	9492	9990	9568
	810					8736	9547	9924	9611
	820					8711	9546	9968	9576
	830					8746	9551	9937	9565
	840					8845	9607	9938	9528
	850					8908	9575	9933	9586
	860					8962	9642	9956	9552
	870					8979	9618	9852	9614
	880					9031	9635	9859	9574
	890					9043	9677	9877	9639
	900					9108	9555	9882	9542
	910					9114	9625	9895	9567
	920					9255	9629	9950	9621
	930					9243	9613	9907	9624
	940					9284	9654	9875	9614
	950					9300	9639	9880	9606
	960					9270	9653	9987	9647
	970					9353	9673	9929	9582
	980					9396	9653	9875	9657
	990					9405	9655	9936	9662
	1000					9512	9618	9910	9631

## Sheet: Panel H
	Maximum Polymerization Rates
	[Dip1] (µM)	Dip1 and VCA	Dip1 and GST-VCA	Dip1 Alone
	0	4.32	5.28	2.82
	0.05	8.24	5.91	3.05
	0.1	10.64	7.03	3.26
	0.25	15.11	8.98	4.12
	0.5	19.84	10.85	5.38
	1	21.47	13.21	7.49
	5	27.59	14.58	12.98
	10	31.39	15.8	16.31
	20	31.91	16.46	19.07
	30	35.59	17.41	20.32
	40	33.29	17.87	21.01
