# Supplementary material for: Synergy between Wsp1 and Dip1 may initiate assembly of endocytic actin networks
Source: eLife. 2020 Nov 12;9:e60419. doi: 10.7554/eLife.60419 (PMC7707826; doi:10.7554/eLife.60419)
Supplement: Figure 3—source data 1. [file elife-60419-fig3-data1.xlsx]

## Sheet: Panel A
		This is the full dataset, only a subset of these curves are shown on Panel A in Figure 3
		COPASI Modeling data (Exp. = Experimental values, Fit = Fitted Values)
	Time	0 uM Dip1 Exp.	0 uM Dip1 Fit	0.1 uM Dip1 Exp.	0.1 uM Dip1 Fit	0.2 uM Dip1 Exp.	0.2 uM Dip1 Fit	0.4 uM Dip1 Exp.	0.4 uM Dip1 Fit	0.5 uM Dip1 Exp.	0.5 uM Dip1 Fit	0.6 uM Dip1 Exp.	0.6 uM Dip1 Fit	1 uM Dip1 Exp.	1 uM Dip1 Fit	2 uM Dip1 Exp.	2 uM Dip1 Fit	5 uM Dip1 Exp.	5 uM Dip1 Fit	10 uM Dip1 Exp.	10 uM Dip1 Fit	15 uM Dip1 Exp.	15 uM Dip1 Fit
	25	1.63e-08
	36	2.41e-08
	45	3.68e-08
	55	5e-08
	65	5.74e-08
	76	7.33e-08
	85	9.39e-08
	95	1.07e-07
	106	1.28e-07
	115	1.46e-07
	125	1.52e-07
	135	1.71e-07
	146	1.83e-07
	155	2.11e-07
	165	2.25e-07
	176	2.42e-07
	185	2.54e-07
	195	2.81e-07
	205	2.85e-07
	216	3.09e-07
	225	3.31e-07
	235	3.46e-07
	245	3.7e-07
	255	3.85e-07
	265	4.02e-07
	275	4.24e-07
	286	4.45e-07
	295	4.67e-07
	305	4.74e-07
	315	4.91e-07
	325	5.46e-07
	335	5.56e-07
	345	5.85e-07
	356	6.33e-07
	365	6.41e-07
	375	6.66e-07
	385	6.81e-07
	396	7.06e-07
	405	7.16e-07
	415	7.31e-07
	426	7.73e-07
	435	7.93e-07
	445	8.24e-07
	455	8.25e-07
	466	8.42e-07
	475	8.8e-07
	485	9.17e-07
	496	9.49e-07
	505	9.52e-07
	515	1e-06
	525	1e-06
	536	1.02e-06
	545	1.04e-06
	555	1.07e-06
	565	1.11e-06
	575	1.12e-06
	585	1.14e-06
	595	1.17e-06
	606	1.21e-06
	615	1.22e-06
	625	1.24e-06
	635	1.27e-06
	645	1.27e-06
	655	1.32e-06
	665	1.32e-06
	676	1.36e-06
	685	1.36e-06
	695	1.4e-06
	705	1.44e-06
	716	1.44e-06
	725	1.43e-06
	735	1.46e-06
	746	1.47e-06
	755	1.52e-06
	765	1.53e-06
	775	1.56e-06
	786	1.57e-06
	795	1.61e-06
	805	1.61e-06
	816	1.64e-06
	825	1.68e-06
	835	1.72e-06
	845	1.75e-06
	856	1.76e-06
	865	1.73e-06
	875	1.71e-06
	885	1.73e-06
	895	1.73e-06
	905	1.77e-06
	915	1.8e-06
	926	1.81e-06
	935	1.82e-06
	945	1.84e-06
	955	1.88e-06
	965	1.88e-06
	975	1.89e-06
	985	1.91e-06
	996	1.94e-06
	1005	1.95e-06
	1015	1.98e-06
	1025	1.99e-06
	1036	2.04e-06
	1045	2.04e-06
	1055	2.07e-06
	1066	2.11e-06
	1075	2.07e-06
	1085	2.09e-06
	1095	2.08e-06
	1106	2.08e-06
	1115	2.09e-06
	1125	2.11e-06
	1136	2.11e-06
	1145	2.12e-06
	1155	2.14e-06
	1165	2.15e-06
	1176	2.14e-06
	1185	2.16e-06
	1195	2.19e-06
	1205	2.2e-06
	1215	2.19e-06
	1225	2.2e-06
	1235	2.23e-06
	1246	2.25e-06
	1255	2.26e-06
	1265	2.25e-06
	1275	2.28e-06
	1285	2.29e-06
	1295	2.32e-06
	1305	2.32e-06
	1316	2.36e-06
	1325	2.37e-06
	1335	2.36e-06
	1345	2.37e-06
	1356	2.4e-06
	1365	2.41e-06
	1375	2.4e-06
	1386	2.41e-06
	1395	2.44e-06
	1405	2.41e-06
	1415	2.44e-06
	1426	2.47e-06
	1435	2.47e-06
	1445	2.49e-06
	1456	2.5e-06
	1465	2.49e-06
	1475	2.53e-06
	1485	2.51e-06
	1496	2.56e-06
	1505	2.58e-06
	1515	2.58e-06
	1526	2.6e-06
	1535	2.6e-06
	1545	2.61e-06
	1555	2.59e-06
	1566	2.6e-06
	1575	2.61e-06
	1585	2.6e-06
	1595	2.6e-06
	1605	2.64e-06
	1615	2.64e-06
	1625	2.64e-06
	1636	2.64e-06
	1645	2.65e-06
	1655	2.67e-06
	1665	2.65e-06
	1675	2.65e-06
	1685	2.66e-06
	1695	2.66e-06
	1706	2.67e-06
	1715	2.67e-06
	1725	2.67e-06
	1735	2.67e-06
	1746	2.7e-06
	1755	2.7e-06
	1765	2.71e-06
	1776	2.73e-06
	1785	2.71e-06
	1795	2.73e-06
	1805	2.73e-06
	1816	2.73e-06
	1825	2.75e-06
	1835	2.74e-06
	1846	2.75e-06
	1855	2.77e-06
	1865	2.76e-06
	1875	2.73e-06
	1886	2.74e-06
	1895	2.76e-06
	1905	2.74e-06
	1915	2.77e-06
	1925	2.76e-06
	1935	2.75e-06
	1945	2.76e-06
	1956	2.73e-06
	1965	2.75e-06
	1975	2.75e-06
	1985	2.75e-06
	1995	2.76e-06
	2005	2.75e-06
	2015	2.77e-06
	2026	2.76e-06
	2035	2.78e-06
	2045	2.78e-06
	2055	2.78e-06
	2066	2.79e-06
	2075	2.82e-06
	2085	2.81e-06
	2096	2.81e-06
	2105	2.81e-06
	2115	2.8e-06
	2125	2.82e-06
	2136	2.82e-06
	2145	2.83e-06
	2155	2.84e-06
	2166	2.83e-06
	2175	2.83e-06
	2185	2.85e-06
	2195	2.85e-06
	2206	2.87e-06
	2215	2.86e-06
	2225	2.85e-06
	2235	2.89e-06
	2245	2.84e-06
	2255	2.87e-06
	2265	2.87e-06
	2276	2.85e-06
	2285	2.86e-06
	2295	2.87e-06
	2305	2.86e-06
	2315	2.86e-06
	2325	2.9e-06
	2335	2.88e-06
	2346	2.86e-06
	2355	2.89e-06
	2365	2.86e-06
	2375	2.89e-06
	2386	2.9e-06
	2395	2.88e-06
	2405	2.87e-06
	2416	2.89e-06
	2425	2.9e-06
	2435	2.88e-06
	2445	2.88e-06
	2456	2.89e-06
	2465	2.89e-06
	2475	2.89e-06
	25		3.47e-09
	27.75		4.28e-09
	30.5		5.16e-09
	33.25		6.13e-09
	36		7.19e-09
	38.25		8.11e-09
	40.5		9.09e-09
	42.75		1.01e-08
	45		1.12e-08
	47.5		1.25e-08
	50		1.38e-08
	52.5		1.52e-08
	55		1.67e-08
	57.5		1.83e-08
	60		1.99e-08
	62.5		2.15e-08
	65		2.33e-08
	67.75		2.53e-08
	70.5		2.74e-08
	73.25		2.95e-08
	76		3.18e-08
	78.25		3.36e-08
	80.5		3.56e-08
	82.75		3.76e-08
	85		3.96e-08
	87.5		4.19e-08
	90		4.43e-08
	92.5		4.68e-08
	95		4.93e-08
	97.75		5.22e-08
	100.5		5.51e-08
	103.25		5.81e-08
	106		6.12e-08
	108.25		6.37e-08
	110.5		6.64e-08
	112.75		6.9e-08
	115		7.17e-08
	117.5		7.48e-08
	120		7.8e-08
	122.5		8.12e-08
	125		8.44e-08
	127.5		8.77e-08
	130		9.11e-08
	132.5		9.45e-08
	135		9.8e-08
	137.75		1.02e-07
	140.5		1.06e-07
	143.25		1.1e-07
	146		1.14e-07
	148.25		1.17e-07
	150.5		1.21e-07
	152.75		1.24e-07
	155		1.28e-07
	157.5		1.32e-07
	160		1.36e-07
	162.5		1.4e-07
	165		1.44e-07
	167.75		1.49e-07
	170.5		1.53e-07
	173.25		1.58e-07
	176		1.63e-07
	178.25		1.67e-07
	180.5		1.71e-07
	182.75		1.75e-07
	185		1.79e-07
	187.5		1.84e-07
	190		1.88e-07
	192.5		1.93e-07
	195		1.98e-07
	197.5		2.02e-07
	200		2.07e-07
	202.5		2.12e-07
	205		2.17e-07
	207.75		2.22e-07
	210.5		2.28e-07
	213.25		2.33e-07
	216		2.39e-07
	218.25		2.44e-07
	220.5		2.48e-07
	222.75		2.53e-07
	225		2.58e-07
	227.5		2.63e-07
	230		2.68e-07
	232.5		2.74e-07
	235		2.79e-07
	237.5		2.84e-07
	240		2.9e-07
	242.5		2.95e-07
	245		3.01e-07
	247.5		3.06e-07
	250		3.12e-07
	252.5		3.18e-07
	255		3.23e-07
	257.5		3.29e-07
	260		3.35e-07
	262.5		3.4e-07
	265		3.46e-07
	267.5		3.52e-07
	270		3.58e-07
	272.5		3.64e-07
	275		3.7e-07
	277.75		3.76e-07
	280.5		3.83e-07
	283.25		3.89e-07
	286		3.96e-07
	288.25		4.01e-07
	290.5		4.07e-07
	292.75		4.12e-07
	295		4.18e-07
	297.5		4.24e-07
	300		4.3e-07
	302.5		4.36e-07
	305		4.43e-07
	307.5		4.49e-07
	310		4.55e-07
	312.5		4.61e-07
	315		4.68e-07
	317.5		4.74e-07
	320		4.8e-07
	322.5		4.87e-07
	325		4.93e-07
	327.5		4.99e-07
	330		5.06e-07
	332.5		5.12e-07
	335		5.19e-07
	337.5		5.25e-07
	340		5.32e-07
	342.5		5.38e-07
	345		5.45e-07
	347.75		5.52e-07
	350.5		5.59e-07
	353.25		5.66e-07
	356		5.73e-07
	358.25		5.79e-07
	360.5		5.85e-07
	362.75		5.91e-07
	365		5.97e-07
	367.5		6.04e-07
	370		6.1e-07
	372.5		6.17e-07
	375		6.24e-07
	377.5		6.3e-07
	380		6.37e-07
	382.5		6.44e-07
	385		6.5e-07
	387.75		6.58e-07
	390.5		6.65e-07
	393.25		6.73e-07
	396		6.8e-07
	398.25		6.86e-07
	400.5		6.92e-07
	402.75		6.98e-07
	405		7.04e-07
	407.5		7.11e-07
	410		7.18e-07
	412.5		7.24e-07
	415		7.31e-07
	417.75		7.39e-07
	420.5		7.46e-07
	423.25		7.54e-07
	426		7.61e-07
	428.25		7.67e-07
	430.5		7.73e-07
	432.75		7.79e-07
	435		7.85e-07
	437.5		7.92e-07
	440		7.99e-07
	442.5		8.06e-07
	445		8.12e-07
	447.5		8.19e-07
	450		8.26e-07
	452.5		8.33e-07
	455		8.4e-07
	457.75		8.47e-07
	460.5		8.54e-07
	463.25		8.62e-07
	466		8.69e-07
	468.25		8.75e-07
	470.5		8.81e-07
	472.75		8.88e-07
	475		8.94e-07
	477.5		9e-07
	480		9.07e-07
	482.5		9.14e-07
	485		9.21e-07
	487.75		9.28e-07
	490.5		9.35e-07
	493.25		9.43e-07
	496		9.5e-07
	498.25		9.56e-07
	500.5		9.62e-07
	502.75		9.68e-07
	505		9.74e-07
	507.5		9.81e-07
	510		9.88e-07
	512.5		9.94e-07
	515		1e-06
	517.5		1.01e-06
	520		1.01e-06
	522.5		1.02e-06
	525		1.03e-06
	527.75		1.03e-06
	530.5		1.04e-06
	533.25		1.05e-06
	536		1.06e-06
	538.25		1.06e-06
	540.5		1.07e-06
	542.75		1.07e-06
	545		1.08e-06
	547.5		1.09e-06
	550		1.09e-06
	552.5		1.1e-06
	555		1.11e-06
	557.5		1.11e-06
	560		1.12e-06
	562.5		1.13e-06
	565		1.13e-06
	567.5		1.14e-06
	570		1.15e-06
	572.5		1.15e-06
	575		1.16e-06
	577.5		1.16e-06
	580		1.17e-06
	582.5		1.18e-06
	585		1.18e-06
	587.5		1.19e-06
	590		1.2e-06
	592.5		1.2e-06
	595		1.21e-06
	597.75		1.22e-06
	600.5		1.22e-06
	603.25		1.23e-06
	606		1.24e-06
	608.25		1.24e-06
	610.5		1.25e-06
	612.75		1.25e-06
	615		1.26e-06
	617.5		1.26e-06
	620		1.27e-06
	622.5		1.28e-06
	625		1.28e-06
	627.5		1.29e-06
	630		1.3e-06
	632.5		1.3e-06
	635		1.31e-06
	637.5		1.31e-06
	640		1.32e-06
	642.5		1.33e-06
	645		1.33e-06
	647.5		1.34e-06
	650		1.34e-06
	652.5		1.35e-06
	655		1.36e-06
	657.5		1.36e-06
	660		1.37e-06
	662.5		1.37e-06
	665		1.38e-06
	667.75		1.39e-06
	670.5		1.39e-06
	673.25		1.4e-06
	676		1.41e-06
	678.25		1.41e-06
	680.5		1.42e-06
	682.75		1.42e-06
	685		1.43e-06
	687.5		1.43e-06
	690		1.44e-06
	692.5		1.44e-06
	695		1.45e-06
	697.5		1.46e-06
	700		1.46e-06
	702.5		1.47e-06
	705		1.47e-06
	707.75		1.48e-06
	710.5		1.48e-06
	713.25		1.49e-06
	716		1.5e-06
	718.25		1.5e-06
	720.5		1.51e-06
	722.75		1.51e-06
	725		1.52e-06
	727.5		1.52e-06
	730		1.53e-06
	732.5		1.53e-06
	735		1.54e-06
	737.75		1.54e-06
	740.5		1.55e-06
	743.25		1.56e-06
	746		1.56e-06
	748.25		1.57e-06
	750.5		1.57e-06
	752.75		1.58e-06
	755		1.58e-06
	757.5		1.59e-06
	760		1.59e-06
	762.5		1.6e-06
	765		1.6e-06
	767.5		1.61e-06
	770		1.61e-06
	772.5		1.62e-06
	775		1.62e-06
	777.75		1.63e-06
	780.5		1.64e-06
	783.25		1.64e-06
	786		1.65e-06
	788.25		1.65e-06
	790.5		1.66e-06
	792.75		1.66e-06
	795		1.66e-06
	797.5		1.67e-06
	800		1.67e-06
	802.5		1.68e-06
	805		1.68e-06
	807.75		1.69e-06
	810.5		1.7e-06
	813.25		1.7e-06
	816		1.71e-06
	818.25		1.71e-06
	820.5		1.72e-06
	822.75		1.72e-06
	825		1.72e-06
	827.5		1.73e-06
	830		1.73e-06
	832.5		1.74e-06
	835		1.74e-06
	837.5		1.75e-06
	840		1.75e-06
	842.5		1.76e-06
	845		1.76e-06
	847.75		1.77e-06
	850.5		1.77e-06
	853.25		1.78e-06
	856		1.78e-06
	858.25		1.79e-06
	860.5		1.79e-06
	862.75		1.8e-06
	865		1.8e-06
	867.5		1.8e-06
	870		1.81e-06
	872.5		1.81e-06
	875		1.82e-06
	877.5		1.82e-06
	880		1.83e-06
	882.5		1.83e-06
	885		1.84e-06
	887.5		1.84e-06
	890		1.84e-06
	892.5		1.85e-06
	895		1.85e-06
	897.5		1.86e-06
	900		1.86e-06
	902.5		1.87e-06
	905		1.87e-06
	907.5		1.87e-06
	910		1.88e-06
	912.5		1.88e-06
	915		1.89e-06
	917.75		1.89e-06
	920.5		1.9e-06
	923.25		1.9e-06
	926		1.91e-06
	928.25		1.91e-06
	930.5		1.91e-06
	932.75		1.92e-06
	935		1.92e-06
	937.5		1.92e-06
	940		1.93e-06
	942.5		1.93e-06
	945		1.94e-06
	947.5		1.94e-06
	950		1.95e-06
	952.5		1.95e-06
	955		1.95e-06
	957.5		1.96e-06
	960		1.96e-06
	962.5		1.97e-06
	965		1.97e-06
	967.5		1.97e-06
	970		1.98e-06
	972.5		1.98e-06
	975		1.98e-06
	977.5		1.99e-06
	980		1.99e-06
	982.5		2e-06
	985		2e-06
	987.75		2e-06
	990.5		2.01e-06
	993.25		2.01e-06
	996		2.02e-06
	998.25		2.02e-06
	1000.5		2.02e-06
	1002.75		2.03e-06
	1005		2.03e-06
	1007.5		2.03e-06
	1010		2.04e-06
	1012.5		2.04e-06
	1015		2.04e-06
	1017.5		2.05e-06
	1020		2.05e-06
	1022.5		2.06e-06
	1025		2.06e-06
	1027.75		2.06e-06
	1030.5		2.07e-06
	1033.25		2.07e-06
	1036		2.07e-06
	1038.25		2.08e-06
	1040.5		2.08e-06
	1042.75		2.08e-06
	1045		2.09e-06
	1047.5		2.09e-06
	1050		2.09e-06
	1052.5		2.1e-06
	1055		2.1e-06
	1057.75		2.1e-06
	1060.5		2.11e-06
	1063.25		2.11e-06
	1066		2.12e-06
	1068.25		2.12e-06
	1070.5		2.12e-06
	1072.75		2.12e-06
	1075		2.13e-06
	1077.5		2.13e-06
	1080		2.13e-06
	1082.5		2.14e-06
	1085		2.14e-06
	1087.5		2.14e-06
	1090		2.15e-06
	1092.5		2.15e-06
	1095		2.15e-06
	1097.75		2.16e-06
	1100.5		2.16e-06
	1103.25		2.16e-06
	1106		2.17e-06
	1108.25		2.17e-06
	1110.5		2.17e-06
	1112.75		2.18e-06
	1115		2.18e-06
	1117.5		2.18e-06
	1120		2.18e-06
	1122.5		2.19e-06
	1125		2.19e-06
	1127.75		2.19e-06
	1130.5		2.2e-06
	1133.25		2.2e-06
	1136		2.2e-06
	1138.25		2.21e-06
	1140.5		2.21e-06
	1142.75		2.21e-06
	1145		2.21e-06
	1147.5		2.22e-06
	1150		2.22e-06
	1152.5		2.22e-06
	1155		2.23e-06
	1157.5		2.23e-06
	1160		2.23e-06
	1162.5		2.24e-06
	1165		2.24e-06
	1167.75		2.24e-06
	1170.5		2.24e-06
	1173.25		2.25e-06
	1176		2.25e-06
	1178.25		2.25e-06
	1180.5		2.26e-06
	1182.75		2.26e-06
	1185		2.26e-06
	1187.5		2.26e-06
	1190		2.27e-06
	1192.5		2.27e-06
	1195		2.27e-06
	1197.5		2.27e-06
	1200		2.28e-06
	1202.5		2.28e-06
	1205		2.28e-06
	1207.5		2.28e-06
	1210		2.29e-06
	1212.5		2.29e-06
	1215		2.29e-06
	1217.5		2.3e-06
	1220		2.3e-06
	1222.5		2.3e-06
	1225		2.3e-06
	1227.5		2.31e-06
	1230		2.31e-06
	1232.5		2.31e-06
	1235		2.31e-06
	1237.75		2.32e-06
	1240.5		2.32e-06
	1243.25		2.32e-06
	1246		2.32e-06
	1248.25		2.33e-06
	1250.5		2.33e-06
	1252.75		2.33e-06
	1255		2.33e-06
	1257.5		2.34e-06
	1260		2.34e-06
	1262.5		2.34e-06
	1265		2.34e-06
	1267.5		2.34e-06
	1270		2.35e-06
	1272.5		2.35e-06
	1275		2.35e-06
	1277.5		2.35e-06
	1280		2.36e-06
	1282.5		2.36e-06
	1285		2.36e-06
	1287.5		2.36e-06
	1290		2.37e-06
	1292.5		2.37e-06
	1295		2.37e-06
	1297.5		2.37e-06
	1300		2.38e-06
	1302.5		2.38e-06
	1305		2.38e-06
	1307.75		2.38e-06
	1310.5		2.38e-06
	1313.25		2.39e-06
	1316		2.39e-06
	1318.25		2.39e-06
	1320.5		2.39e-06
	1322.75		2.4e-06
	1325		2.4e-06
	1327.5		2.4e-06
	1330		2.4e-06
	1332.5		2.4e-06
	1335		2.41e-06
	1337.5		2.41e-06
	1340		2.41e-06
	1342.5		2.41e-06
	1345		2.41e-06
	1347.75		2.42e-06
	1350.5		2.42e-06
	1353.25		2.42e-06
	1356		2.42e-06
	1358.25		2.42e-06
	1360.5		2.43e-06
	1362.75		2.43e-06
	1365		2.43e-06
	1367.5		2.43e-06
	1370		2.43e-06
	1372.5		2.44e-06
	1375		2.44e-06
	1377.75		2.44e-06
	1380.5		2.44e-06
	1383.25		2.44e-06
	1386		2.45e-06
	1388.25		2.45e-06
	1390.5		2.45e-06
	1392.75		2.45e-06
	1395		2.45e-06
	1397.5		2.46e-06
	1400		2.46e-06
	1402.5		2.46e-06
	1405		2.46e-06
	1407.5		2.46e-06
	1410		2.47e-06
	1412.5		2.47e-06
	1415		2.47e-06
	1417.75		2.47e-06
	1420.5		2.47e-06
	1423.25		2.48e-06
	1426		2.48e-06
	1428.25		2.48e-06
	1430.5		2.48e-06
	1432.75		2.48e-06
	1435		2.48e-06
	1437.5		2.49e-06
	1440		2.49e-06
	1442.5		2.49e-06
	1445		2.49e-06
	1447.75		2.49e-06
	1450.5		2.49e-06
	1453.25		2.5e-06
	1456		2.5e-06
	1458.25		2.5e-06
	1460.5		2.5e-06
	1462.75		2.5e-06
	1465		2.5e-06
	1467.5		2.51e-06
	1470		2.51e-06
	1472.5		2.51e-06
	1475		2.51e-06
	1477.5		2.51e-06
	1480		2.51e-06
	1482.5		2.52e-06
	1485		2.52e-06
	1487.75		2.52e-06
	1490.5		2.52e-06
	1493.25		2.52e-06
	1496		2.52e-06
	1498.25		2.53e-06
	1500.5		2.53e-06
	1502.75		2.53e-06
	1505		2.53e-06
	1507.5		2.53e-06
	1510		2.53e-06
	1512.5		2.54e-06
	1515		2.54e-06
	1517.75		2.54e-06
	1520.5		2.54e-06
	1523.25		2.54e-06
	1526		2.54e-06
	1528.25		2.54e-06
	1530.5		2.55e-06
	1532.75		2.55e-06
	1535		2.55e-06
	1537.5		2.55e-06
	1540		2.55e-06
	1542.5		2.55e-06
	1545		2.55e-06
	1547.5		2.56e-06
	1550		2.56e-06
	1552.5		2.56e-06
	1555		2.56e-06
	1557.75		2.56e-06
	1560.5		2.56e-06
	1563.25		2.57e-06
	1566		2.57e-06
	1568.25		2.57e-06
	1570.5		2.57e-06
	1572.75		2.57e-06
	1575		2.57e-06
	1577.5		2.57e-06
	1580		2.57e-06
	1582.5		2.58e-06
	1585		2.58e-06
	1587.5		2.58e-06
	1590		2.58e-06
	1592.5		2.58e-06
	1595		2.58e-06
	1597.5		2.58e-06
	1600		2.59e-06
	1602.5		2.59e-06
	1605		2.59e-06
	1607.5		2.59e-06
	1610		2.59e-06
	1612.5		2.59e-06
	1615		2.59e-06
	1617.5		2.59e-06
	1620		2.6e-06
	1622.5		2.6e-06
	1625		2.6e-06
	1627.75		2.6e-06
	1630.5		2.6e-06
	1633.25		2.6e-06
	1636		2.6e-06
	1638.25		2.61e-06
	1640.5		2.61e-06
	1642.75		2.61e-06
	1645		2.61e-06
	1647.5		2.61e-06
	1650		2.61e-06
	1652.5		2.61e-06
	1655		2.61e-06
	1657.5		2.61e-06
	1660		2.62e-06
	1662.5		2.62e-06
	1665		2.62e-06
	1667.5		2.62e-06
	1670		2.62e-06
	1672.5		2.62e-06
	1675		2.62e-06
	1677.5		2.62e-06
	1680		2.62e-06
	1682.5		2.63e-06
	1685		2.63e-06
	1687.5		2.63e-06
	1690		2.63e-06
	1692.5		2.63e-06
	1695		2.63e-06
	1697.75		2.63e-06
	1700.5		2.63e-06
	1703.25		2.64e-06
	1706		2.64e-06
	1708.25		2.64e-06
	1710.5		2.64e-06
	1712.75		2.64e-06
	1715		2.64e-06
	1717.5		2.64e-06
	1720		2.64e-06
	1722.5		2.64e-06
	1725		2.64e-06
	1727.5		2.65e-06
	1730		2.65e-06
	1732.5		2.65e-06
	1735		2.65e-06
	1737.75		2.65e-06
	1740.5		2.65e-06
	1743.25		2.65e-06
	1746		2.65e-06
	1748.25		2.65e-06
	1750.5		2.66e-06
	1752.75		2.66e-06
	1755		2.66e-06
	1757.5		2.66e-06
	1760		2.66e-06
	1762.5		2.66e-06
	1765		2.66e-06
	1767.75		2.66e-06
	1770.5		2.66e-06
	1773.25		2.66e-06
	1776		2.67e-06
	1778.25		2.67e-06
	1780.5		2.67e-06
	1782.75		2.67e-06
	1785		2.67e-06
	1787.5		2.67e-06
	1790		2.67e-06
	1792.5		2.67e-06
	1795		2.67e-06
	1797.5		2.67e-06
	1800		2.67e-06
	1802.5		2.68e-06
	1805		2.68e-06
	1807.75		2.68e-06
	1810.5		2.68e-06
	1813.25		2.68e-06
	1816		2.68e-06
	1818.25		2.68e-06
	1820.5		2.68e-06
	1822.75		2.68e-06
	1825		2.68e-06
	1827.5		2.68e-06
	1830		2.69e-06
	1832.5		2.69e-06
	1835		2.69e-06
	1837.75		2.69e-06
	1840.5		2.69e-06
	1843.25		2.69e-06
	1846		2.69e-06
	1848.25		2.69e-06
	1850.5		2.69e-06
	1852.75		2.69e-06
	1855		2.69e-06
	1857.5		2.69e-06
	1860		2.7e-06
	1862.5		2.7e-06
	1865		2.7e-06
	1867.5		2.7e-06
	1870		2.7e-06
	1872.5		2.7e-06
	1875		2.7e-06
	1877.75		2.7e-06
	1880.5		2.7e-06
	1883.25		2.7e-06
	1886		2.7e-06
	1888.25		2.7e-06
	1890.5		2.71e-06
	1892.75		2.71e-06
	1895		2.71e-06
	1897.5		2.71e-06
	1900		2.71e-06
	1902.5		2.71e-06
	1905		2.71e-06
	1907.5		2.71e-06
	1910		2.71e-06
	1912.5		2.71e-06
	1915		2.71e-06
	1917.5		2.71e-06
	1920		2.71e-06
	1922.5		2.72e-06
	1925		2.72e-06
	1927.5		2.72e-06
	1930		2.72e-06
	1932.5		2.72e-06
	1935		2.72e-06
	1937.5		2.72e-06
	1940		2.72e-06
	1942.5		2.72e-06
	1945		2.72e-06
	1947.75		2.72e-06
	1950.5		2.72e-06
	1953.25		2.72e-06
	1956		2.73e-06
	1958.25		2.73e-06
	1960.5		2.73e-06
	1962.75		2.73e-06
	1965		2.73e-06
	1967.5		2.73e-06
	1970		2.73e-06
	1972.5		2.73e-06
	1975		2.73e-06
	1977.5		2.73e-06
	1980		2.73e-06
	1982.5		2.73e-06
	1985		2.73e-06
	1987.5		2.73e-06
	1990		2.73e-06
	1992.5		2.74e-06
	1995		2.74e-06
	1997.5		2.74e-06
	2000		2.74e-06
	2002.5		2.74e-06
	2005		2.74e-06
	2007.5		2.74e-06
	2010		2.74e-06
	2012.5		2.74e-06
	2015		2.74e-06
	2017.75		2.74e-06
	2020.5		2.74e-06
	2023.25		2.74e-06
	2026		2.74e-06
	2028.25		2.74e-06
	2030.5		2.74e-06
	2032.75		2.75e-06
	2035		2.75e-06
	2037.5		2.75e-06
	2040		2.75e-06
	2042.5		2.75e-06
	2045		2.75e-06
	2047.5		2.75e-06
	2050		2.75e-06
	2052.5		2.75e-06
	2055		2.75e-06
	2057.75		2.75e-06
	2060.5		2.75e-06
	2063.25		2.75e-06
	2066		2.75e-06
	2068.25		2.75e-06
	2070.5		2.75e-06
	2072.75		2.75e-06
	2075		2.76e-06
	2077.5		2.76e-06
	2080		2.76e-06
	2082.5		2.76e-06
	2085		2.76e-06
	2087.75		2.76e-06
	2090.5		2.76e-06
	2093.25		2.76e-06
	2096		2.76e-06
	2098.25		2.76e-06
	2100.5		2.76e-06
	2102.75		2.76e-06
	2105		2.76e-06
	2107.5		2.76e-06
	2110		2.76e-06
	2112.5		2.76e-06
	2115		2.76e-06
	2117.5		2.76e-06
	2120		2.76e-06
	2122.5		2.77e-06
	2125		2.77e-06
	2127.75		2.77e-06
	2130.5		2.77e-06
	2133.25		2.77e-06
	2136		2.77e-06
	2138.25		2.77e-06
	2140.5		2.77e-06
	2142.75		2.77e-06
	2145		2.77e-06
	2147.5		2.77e-06
	2150		2.77e-06
	2152.5		2.77e-06
	2155		2.77e-06
	2157.75		2.77e-06
	2160.5		2.77e-06
	2163.25		2.77e-06
	2166		2.77e-06
	2168.25		2.77e-06
	2170.5		2.77e-06
	2172.75		2.78e-06
	2175		2.78e-06
	2177.5		2.78e-06
	2180		2.78e-06
	2182.5		2.78e-06
	2185		2.78e-06
	2187.5		2.78e-06
	2190		2.78e-06
	2192.5		2.78e-06
	2195		2.78e-06
	2197.75		2.78e-06
	2200.5		2.78e-06
	2203.25		2.78e-06
	2206		2.78e-06
	2208.25		2.78e-06
	2210.5		2.78e-06
	2212.75		2.78e-06
	2215		2.78e-06
	2217.5		2.78e-06
	2220		2.78e-06
	2222.5		2.78e-06
	2225		2.78e-06
	2227.5		2.79e-06
	2230		2.79e-06
	2232.5		2.79e-06
	2235		2.79e-06
	2237.5		2.79e-06
	2240		2.79e-06
	2242.5		2.79e-06
	2245		2.79e-06
	2247.5		2.79e-06
	2250		2.79e-06
	2252.5		2.79e-06
	2255		2.79e-06
	2257.5		2.79e-06
	2260		2.79e-06
	2262.5		2.79e-06
	2265		2.79e-06
	2267.75		2.79e-06
	2270.5		2.79e-06
	2273.25		2.79e-06
	2276		2.79e-06
	2278.25		2.79e-06
	2280.5		2.79e-06
	2282.75		2.79e-06
	2285		2.79e-06
	2287.5		2.79e-06
	2290		2.8e-06
	2292.5		2.8e-06
	2295		2.8e-06
	2297.5		2.8e-06
	2300		2.8e-06
	2302.5		2.8e-06
	2305		2.8e-06
	2307.5		2.8e-06
	2310		2.8e-06
	2312.5		2.8e-06
	2315		2.8e-06
	2317.5		2.8e-06
	2320		2.8e-06
	2322.5		2.8e-06
	2325		2.8e-06
	2327.5		2.8e-06
	2330		2.8e-06
	2332.5		2.8e-06
	2335		2.8e-06
	2337.75		2.8e-06
	2340.5		2.8e-06
	2343.25		2.8e-06
	2346		2.8e-06
	2348.25		2.8e-06
	2350.5		2.8e-06
	2352.75		2.8e-06
	2355		2.8e-06
	2357.5		2.81e-06
	2360		2.81e-06
	2362.5		2.81e-06
	2365		2.81e-06
	2367.5		2.81e-06
	2370		2.81e-06
	2372.5		2.81e-06
	2375		2.81e-06
	2377.75		2.81e-06
	2380.5		2.81e-06
	2383.25		2.81e-06
	2386		2.81e-06
	2388.25		2.81e-06
	2390.5		2.81e-06
	2392.75		2.81e-06
	2395		2.81e-06
	2397.5		2.81e-06
	2400		2.81e-06
	2402.5		2.81e-06
	2405		2.81e-06
	2407.75		2.81e-06
	2410.5		2.81e-06
	2413.25		2.81e-06
	2416		2.81e-06
	2418.25		2.81e-06
	2420.5		2.81e-06
	2422.75		2.81e-06
	2425		2.81e-06
	2427.5		2.81e-06
	2430		2.81e-06
	2432.5		2.81e-06
	2435		2.81e-06
	2437.5		2.82e-06
	2440		2.82e-06
	2442.5		2.82e-06
	2445		2.82e-06
	2447.75		2.82e-06
	2450.5		2.82e-06
	2453.25		2.82e-06
	2456		2.82e-06
	2458.25		2.82e-06
	2460.5		2.82e-06
	2462.75		2.82e-06
	2465		2.82e-06
	2467.5		2.82e-06
	2470		2.82e-06
	2472.5		2.82e-06
	2475		2.82e-06
	2475		2.82e-06
	25.67			3.14e-09
	36.67			1.65e-08
	45.67			2.71e-08
	55.67			3.57e-08
	65.67			4.63e-08
	76.67			6.43e-08
	85.67			7.72e-08
	95.67			9.27e-08
	106.67			1.23e-07
	115.67			1.32e-07
	125.67			1.61e-07
	135.67			1.91e-07
	146.67			2.09e-07
	155.67			2.4e-07
	165.67			2.66e-07
	176.67			3.09e-07
	185.67			3.22e-07
	195.67			3.64e-07
	205.67			3.94e-07
	216.67			4.42e-07
	225.67			4.67e-07
	235.67			4.96e-07
	245.67			5.42e-07
	255.67			5.85e-07
	265.67			6.18e-07
	275.67			6.5e-07
	286.67			6.97e-07
	295.67			7.31e-07
	305.67			7.78e-07
	315.67			8.08e-07
	325.67			8.58e-07
	335.67			8.91e-07
	345.67			9.44e-07
	356.67			9.81e-07
	365.67			1.01e-06
	375.67			1.05e-06
	385.67			1.08e-06
	396.67			1.14e-06
	405.67			1.17e-06
	415.67			1.23e-06
	426.67			1.25e-06
	435.67			1.29e-06
	445.67			1.32e-06
	455.67			1.36e-06
	466.67			1.39e-06
	475.67			1.41e-06
	485.67			1.45e-06
	496.67			1.49e-06
	505.67			1.52e-06
	515.67			1.56e-06
	525.67			1.59e-06
	536.67			1.63e-06
	545.67			1.67e-06
	555.67			1.7e-06
	565.67			1.73e-06
	575.67			1.76e-06
	585.67			1.81e-06
	595.67			1.83e-06
	606.67			1.86e-06
	615.67			1.9e-06
	625.67			1.92e-06
	635.67			1.93e-06
	645.67			1.97e-06
	655.67			2.01e-06
	665.67			2.02e-06
	676.67			2.07e-06
	685.67			2.09e-06
	695.67			2.11e-06
	705.67			2.13e-06
	716.67			2.16e-06
	725.67			2.18e-06
	735.67			2.19e-06
	746.67			2.22e-06
	755.67			2.24e-06
	765.67			2.25e-06
	775.67			2.28e-06
	786.67			2.3e-06
	795.67			2.31e-06
	805.67			2.33e-06
	816.67			2.36e-06
	825.67			2.38e-06
	835.67			2.38e-06
	845.67			2.39e-06
	856.67			2.41e-06
	865.67			2.41e-06
	875.67			2.44e-06
	885.67			2.47e-06
	895.67			2.47e-06
	905.67			2.49e-06
	915.67			2.49e-06
	926.67			2.51e-06
	935.67			2.52e-06
	945.67			2.55e-06
	955.67			2.54e-06
	965.67			2.57e-06
	975.67			2.57e-06
	985.67			2.58e-06
	996.67			2.6e-06
	1005.7			2.6e-06
	1015.7			2.63e-06
	1025.7			2.6e-06
	1036.7			2.62e-06
	1045.7			2.65e-06
	1055.7			2.67e-06
	1066.7			2.67e-06
	1075.7			2.66e-06
	1085.7			2.68e-06
	1095.7			2.7e-06
	1106.7			2.69e-06
	1115.7			2.7e-06
	1125.7			2.71e-06
	1136.7			2.73e-06
	1145.7			2.71e-06
	1155.7			2.72e-06
	1165.7			2.74e-06
	1176.7			2.74e-06
	1185.7			2.76e-06
	1195.7			2.76e-06
	1205.7			2.76e-06
	1215.7			2.77e-06
	1225.7			2.75e-06
	1235.7			2.78e-06
	1246.7			2.79e-06
	1255.7			2.77e-06
	1265.7			2.78e-06
	1275.7			2.8e-06
	1285.7			2.78e-06
	1295.7			2.82e-06
	1305.7			2.83e-06
	1316.7			2.81e-06
	1325.7			2.84e-06
	1335.7			2.83e-06
	1345.7			2.83e-06
	1356.7			2.83e-06
	1365.7			2.82e-06
	1375.7			2.82e-06
	1386.7			2.83e-06
	1395.7			2.83e-06
	1405.7			2.83e-06
	1415.7			2.85e-06
	1426.7			2.85e-06
	1435.7			2.86e-06
	1445.7			2.84e-06
	1456.7			2.9e-06
	1465.7			2.87e-06
	1475.7			2.88e-06
	1485.7			2.87e-06
	1496.7			2.87e-06
	1505.7			2.87e-06
	1515.7			2.88e-06
	1526.7			2.88e-06
	1535.7			2.89e-06
	1545.7			2.89e-06
	1555.7			2.89e-06
	1566.7			2.89e-06
	1575.7			2.89e-06
	1585.7			2.89e-06
	1595.7			2.87e-06
	1605.7			2.88e-06
	1615.7			2.86e-06
	1625.7			2.87e-06
	1636.7			2.89e-06
	1645.7			2.87e-06
	1655.7			2.89e-06
	1665.7			2.87e-06
	1675.7			2.89e-06
	1685.7			2.87e-06
	1695.7			2.9e-06
	1706.7			2.89e-06
	1715.7			2.88e-06
	25.67				6.54e-09
	28.42				8.02e-09
	31.17				9.64e-09
	33.92				1.14e-08
	36.67				1.33e-08
	38.92				1.5e-08
	41.17				1.68e-08
	43.42				1.87e-08
	45.67				2.06e-08
	48.17				2.3e-08
	50.67				2.54e-08
	53.17				2.79e-08
	55.67				3.06e-08
	58.17				3.34e-08
	60.67				3.63e-08
	63.17				3.93e-08
	65.67				4.25e-08
	68.42				4.61e-08
	71.17				4.98e-08
	73.92				5.37e-08
	76.67				5.77e-08
	78.92				6.1e-08
	81.17				6.45e-08
	83.42				6.81e-08
	85.67				7.17e-08
	88.17				7.59e-08
	90.67				8.02e-08
	93.17				8.46e-08
	95.67				8.91e-08
	98.42				9.41e-08
	101.17				9.93e-08
	103.92				1.05e-07
	106.67				1.1e-07
	108.92				1.15e-07
	111.17				1.19e-07
	113.42				1.24e-07
	115.67				1.29e-07
	118.17				1.34e-07
	120.67				1.4e-07
	123.17				1.45e-07
	125.67				1.51e-07
	128.17				1.57e-07
	130.67				1.63e-07
	133.17				1.69e-07
	135.67				1.75e-07
	138.42				1.82e-07
	141.17				1.89e-07
	143.92				1.96e-07
	146.67				2.03e-07
	148.92				2.09e-07
	151.17				2.15e-07
	153.42				2.21e-07
	155.67				2.27e-07
	158.17				2.34e-07
	160.67				2.41e-07
	163.17				2.48e-07
	165.67				2.55e-07
	168.42				2.63e-07
	171.17				2.71e-07
	173.92				2.8e-07
	176.67				2.88e-07
	178.92				2.95e-07
	181.17				3.01e-07
	183.42				3.08e-07
	185.67				3.15e-07
	188.17				3.23e-07
	190.67				3.31e-07
	193.17				3.39e-07
	195.67				3.47e-07
	198.17				3.55e-07
	200.67				3.63e-07
	203.17				3.72e-07
	205.67				3.8e-07
	208.42				3.89e-07
	211.17				3.98e-07
	213.92				4.08e-07
	216.67				4.17e-07
	218.92				4.25e-07
	221.17				4.33e-07
	223.42				4.41e-07
	225.67				4.48e-07
	228.17				4.57e-07
	230.67				4.66e-07
	233.17				4.75e-07
	235.67				4.84e-07
	238.17				4.93e-07
	240.67				5.02e-07
	243.17				5.11e-07
	245.67				5.2e-07
	248.17				5.3e-07
	250.67				5.39e-07
	253.17				5.48e-07
	255.67				5.57e-07
	258.17				5.67e-07
	260.67				5.76e-07
	263.17				5.86e-07
	265.67				5.95e-07
	268.17				6.05e-07
	270.67				6.14e-07
	273.17				6.24e-07
	275.67				6.33e-07
	278.42				6.44e-07
	281.17				6.54e-07
	283.92				6.65e-07
	286.67				6.76e-07
	288.92				6.85e-07
	291.17				6.93e-07
	293.42				7.02e-07
	295.67				7.11e-07
	298.17				7.21e-07
	300.67				7.31e-07
	303.17				7.4e-07
	305.67				7.5e-07
	308.17				7.6e-07
	310.67				7.7e-07
	313.17				7.8e-07
	315.67				7.9e-07
	318.17				8e-07
	320.67				8.1e-07
	323.17				8.2e-07
	325.67				8.3e-07
	328.17				8.4e-07
	330.67				8.5e-07
	333.17				8.6e-07
	335.67				8.7e-07
	338.17				8.8e-07
	340.67				8.9e-07
	343.17				9e-07
	345.67				9.1e-07
	348.42				9.22e-07
	351.17				9.33e-07
	353.92				9.44e-07
	356.67				9.55e-07
	358.92				9.64e-07
	361.17				9.73e-07
	363.42				9.82e-07
	365.67				9.91e-07
	368.17				1e-06
	370.67				1.01e-06
	373.17				1.02e-06
	375.67				1.03e-06
	378.17				1.04e-06
	380.67				1.05e-06
	383.17				1.06e-06
	385.67				1.07e-06
	388.42				1.08e-06
	391.17				1.09e-06
	393.92				1.1e-06
	396.67				1.12e-06
	398.92				1.12e-06
	401.17				1.13e-06
	403.42				1.14e-06
	405.67				1.15e-06
	408.17				1.16e-06
	410.67				1.17e-06
	413.17				1.18e-06
	415.67				1.19e-06
	418.42				1.2e-06
	421.17				1.21e-06
	423.92				1.22e-06
	426.67				1.23e-06
	428.92				1.24e-06
	431.17				1.25e-06
	433.42				1.26e-06
	435.67				1.27e-06
	438.17				1.28e-06
	440.67				1.29e-06
	443.17				1.3e-06
	445.67				1.31e-06
	448.17				1.32e-06
	450.67				1.33e-06
	453.17				1.34e-06
	455.67				1.35e-06
	458.42				1.36e-06
	461.17				1.37e-06
	463.92				1.38e-06
	466.67				1.39e-06
	468.92				1.4e-06
	471.17				1.41e-06
	473.42				1.41e-06
	475.67				1.42e-06
	478.17				1.43e-06
	480.67				1.44e-06
	483.17				1.45e-06
	485.67				1.46e-06
	488.42				1.47e-06
	491.17				1.48e-06
	493.92				1.49e-06
	496.67				1.5e-06
	498.92				1.51e-06
	501.17				1.52e-06
	503.42				1.53e-06
	505.67				1.53e-06
	508.17				1.54e-06
	510.67				1.55e-06
	513.17				1.56e-06
	515.67				1.57e-06
	518.17				1.58e-06
	520.67				1.59e-06
	523.17				1.6e-06
	525.67				1.6e-06
	528.42				1.61e-06
	531.17				1.62e-06
	533.92				1.63e-06
	536.67				1.64e-06
	538.92				1.65e-06
	541.17				1.66e-06
	543.42				1.67e-06
	545.67				1.67e-06
	548.17				1.68e-06
	550.67				1.69e-06
	553.17				1.7e-06
	555.67				1.71e-06
	558.17				1.72e-06
	560.67				1.72e-06
	563.17				1.73e-06
	565.67				1.74e-06
	568.17				1.75e-06
	570.67				1.76e-06
	573.17				1.77e-06
	575.67				1.77e-06
	578.17				1.78e-06
	580.67				1.79e-06
	583.17				1.8e-06
	585.67				1.81e-06
	588.17				1.81e-06
	590.67				1.82e-06
	593.17				1.83e-06
	595.67				1.84e-06
	598.42				1.85e-06
	601.17				1.85e-06
	603.92				1.86e-06
	606.67				1.87e-06
	608.92				1.88e-06
	611.17				1.88e-06
	613.42				1.89e-06
	615.67				1.9e-06
	618.17				1.91e-06
	620.67				1.91e-06
	623.17				1.92e-06
	625.67				1.93e-06
	628.17				1.94e-06
	630.67				1.94e-06
	633.17				1.95e-06
	635.67				1.96e-06
	638.17				1.96e-06
	640.67				1.97e-06
	643.17				1.98e-06
	645.67				1.99e-06
	648.17				1.99e-06
	650.67				2e-06
	653.17				2.01e-06
	655.67				2.01e-06
	658.17				2.02e-06
	660.67				2.03e-06
	663.17				2.03e-06
	665.67				2.04e-06
	668.42				2.05e-06
	671.17				2.06e-06
	673.92				2.06e-06
	676.67				2.07e-06
	678.92				2.08e-06
	681.17				2.08e-06
	683.42				2.09e-06
	685.67				2.09e-06
	688.17				2.1e-06
	690.67				2.11e-06
	693.17				2.11e-06
	695.67				2.12e-06
	698.17				2.13e-06
	700.67				2.13e-06
	703.17				2.14e-06
	705.67				2.14e-06
	708.42				2.15e-06
	711.17				2.16e-06
	713.92				2.16e-06
	716.67				2.17e-06
	718.92				2.18e-06
	721.17				2.18e-06
	723.42				2.19e-06
	725.67				2.19e-06
	728.17				2.2e-06
	730.67				2.2e-06
	733.17				2.21e-06
	735.67				2.21e-06
	738.42				2.22e-06
	741.17				2.23e-06
	743.92				2.23e-06
	746.67				2.24e-06
	748.92				2.24e-06
	751.17				2.25e-06
	753.42				2.25e-06
	755.67				2.26e-06
	758.17				2.26e-06
	760.67				2.27e-06
	763.17				2.28e-06
	765.67				2.28e-06
	768.17				2.29e-06
	770.67				2.29e-06
	773.17				2.3e-06
	775.67				2.3e-06
	778.42				2.31e-06
	781.17				2.31e-06
	783.92				2.32e-06
	786.67				2.32e-06
	788.92				2.33e-06
	791.17				2.33e-06
	793.42				2.34e-06
	795.67				2.34e-06
	798.17				2.35e-06
	800.67				2.35e-06
	803.17				2.36e-06
	805.67				2.36e-06
	808.42				2.37e-06
	811.17				2.37e-06
	813.92				2.38e-06
	816.67				2.38e-06
	818.92				2.38e-06
	821.17				2.39e-06
	823.42				2.39e-06
	825.67				2.4e-06
	828.17				2.4e-06
	830.67				2.41e-06
	833.17				2.41e-06
	835.67				2.41e-06
	838.17				2.42e-06
	840.67				2.42e-06
	843.17				2.43e-06
	845.67				2.43e-06
	848.42				2.44e-06
	851.17				2.44e-06
	853.92				2.45e-06
	856.67				2.45e-06
	858.92				2.45e-06
	861.17				2.46e-06
	863.42				2.46e-06
	865.67				2.46e-06
	868.17				2.47e-06
	870.67				2.47e-06
	873.17				2.48e-06
	875.67				2.48e-06
	878.17				2.48e-06
	880.67				2.49e-06
	883.17				2.49e-06
	885.67				2.49e-06
	888.17				2.5e-06
	890.67				2.5e-06
	893.17				2.51e-06
	895.67				2.51e-06
	898.17				2.51e-06
	900.67				2.52e-06
	903.17				2.52e-06
	905.67				2.52e-06
	908.17				2.53e-06
	910.67				2.53e-06
	913.17				2.53e-06
	915.67				2.54e-06
	918.42				2.54e-06
	921.17				2.54e-06
	923.92				2.55e-06
	926.67				2.55e-06
	928.92				2.55e-06
	931.17				2.56e-06
	933.42				2.56e-06
	935.67				2.56e-06
	938.17				2.57e-06
	940.67				2.57e-06
	943.17				2.57e-06
	945.67				2.58e-06
	948.17				2.58e-06
	950.67				2.58e-06
	953.17				2.58e-06
	955.67				2.59e-06
	958.17				2.59e-06
	960.67				2.59e-06
	963.17				2.6e-06
	965.67				2.6e-06
	968.17				2.6e-06
	970.67				2.6e-06
	973.17				2.61e-06
	975.67				2.61e-06
	978.17				2.61e-06
	980.67				2.62e-06
	983.17				2.62e-06
	985.67				2.62e-06
	988.42				2.62e-06
	991.17				2.63e-06
	993.92				2.63e-06
	996.67				2.63e-06
	998.928				2.63e-06
	1001.18				2.64e-06
	1003.44				2.64e-06
	1005.7				2.64e-06
	1008.2				2.64e-06
	1010.7				2.65e-06
	1013.2				2.65e-06
	1015.7				2.65e-06
	1018.2				2.65e-06
	1020.7				2.66e-06
	1023.2				2.66e-06
	1025.7				2.66e-06
	1028.45				2.66e-06
	1031.2				2.67e-06
	1033.95				2.67e-06
	1036.7				2.67e-06
	1038.95				2.67e-06
	1041.2				2.67e-06
	1043.45				2.68e-06
	1045.7				2.68e-06
	1048.2				2.68e-06
	1050.7				2.68e-06
	1053.2				2.68e-06
	1055.7				2.69e-06
	1058.45				2.69e-06
	1061.2				2.69e-06
	1063.95				2.69e-06
	1066.7				2.7e-06
	1068.95				2.7e-06
	1071.2				2.7e-06
	1073.45				2.7e-06
	1075.7				2.7e-06
	1078.2				2.7e-06
	1080.7				2.71e-06
	1083.2				2.71e-06
	1085.7				2.71e-06
	1088.2				2.71e-06
	1090.7				2.71e-06
	1093.2				2.72e-06
	1095.7				2.72e-06
	1098.45				2.72e-06
	1101.2				2.72e-06
	1103.95				2.72e-06
	1106.7				2.73e-06
	1108.95				2.73e-06
	1111.2				2.73e-06
	1113.45				2.73e-06
	1115.7				2.73e-06
	1118.2				2.73e-06
	1120.7				2.73e-06
	1123.2				2.74e-06
	1125.7				2.74e-06
	1128.45				2.74e-06
	1131.2				2.74e-06
	1133.95				2.74e-06
	1136.7				2.74e-06
	1138.95				2.75e-06
	1141.2				2.75e-06
	1143.45				2.75e-06
	1145.7				2.75e-06
	1148.2				2.75e-06
	1150.7				2.75e-06
	1153.2				2.75e-06
	1155.7				2.76e-06
	1158.2				2.76e-06
	1160.7				2.76e-06
	1163.2				2.76e-06
	1165.7				2.76e-06
	1168.45				2.76e-06
	1171.2				2.76e-06
	1173.95				2.77e-06
	1176.7				2.77e-06
	1178.95				2.77e-06
	1181.2				2.77e-06
	1183.45				2.77e-06
	1185.7				2.77e-06
	1188.2				2.77e-06
	1190.7				2.77e-06
	1193.2				2.78e-06
	1195.7				2.78e-06
	1198.2				2.78e-06
	1200.7				2.78e-06
	1203.2				2.78e-06
	1205.7				2.78e-06
	1208.2				2.78e-06
	1210.7				2.78e-06
	1213.2				2.78e-06
	1215.7				2.79e-06
	1218.2				2.79e-06
	1220.7				2.79e-06
	1223.2				2.79e-06
	1225.7				2.79e-06
	1228.2				2.79e-06
	1230.7				2.79e-06
	1233.2				2.79e-06
	1235.7				2.79e-06
	1238.45				2.8e-06
	1241.2				2.8e-06
	1243.95				2.8e-06
	1246.7				2.8e-06
	1248.95				2.8e-06
	1251.2				2.8e-06
	1253.45				2.8e-06
	1255.7				2.8e-06
	1258.2				2.8e-06
	1260.7				2.8e-06
	1263.2				2.8e-06
	1265.7				2.81e-06
	1268.2				2.81e-06
	1270.7				2.81e-06
	1273.2				2.81e-06
	1275.7				2.81e-06
	1278.2				2.81e-06
	1280.7				2.81e-06
	1283.2				2.81e-06
	1285.7				2.81e-06
	1288.2				2.81e-06
	1290.7				2.81e-06
	1293.2				2.81e-06
	1295.7				2.82e-06
	1298.2				2.82e-06
	1300.7				2.82e-06
	1303.2				2.82e-06
	1305.7				2.82e-06
	1308.45				2.82e-06
	1311.2				2.82e-06
	1313.95				2.82e-06
	1316.7				2.82e-06
	1318.95				2.82e-06
	1321.2				2.82e-06
	1323.45				2.82e-06
	1325.7				2.82e-06
	1328.2				2.83e-06
	1330.7				2.83e-06
	1333.2				2.83e-06
	1335.7				2.83e-06
	1338.2				2.83e-06
	1340.7				2.83e-06
	1343.2				2.83e-06
	1345.7				2.83e-06
	1348.45				2.83e-06
	1351.2				2.83e-06
	1353.95				2.83e-06
	1356.7				2.83e-06
	1358.95				2.83e-06
	1361.2				2.83e-06
	1363.45				2.83e-06
	1365.7				2.83e-06
	1368.2				2.83e-06
	1370.7				2.84e-06
	1373.2				2.84e-06
	1375.7				2.84e-06
	1378.45				2.84e-06
	1381.2				2.84e-06
	1383.95				2.84e-06
	1386.7				2.84e-06
	1388.95				2.84e-06
	1391.2				2.84e-06
	1393.45				2.84e-06
	1395.7				2.84e-06
	1398.2				2.84e-06
	1400.7				2.84e-06
	1403.2				2.84e-06
	1405.7				2.84e-06
	1408.2				2.84e-06
	1410.7				2.84e-06
	1413.2				2.84e-06
	1415.7				2.84e-06
	1418.45				2.85e-06
	1421.2				2.85e-06
	1423.95				2.85e-06
	1426.7				2.85e-06
	1428.95				2.85e-06
	1431.2				2.85e-06
	1433.45				2.85e-06
	1435.7				2.85e-06
	1438.2				2.85e-06
	1440.7				2.85e-06
	1443.2				2.85e-06
	1445.7				2.85e-06
	1448.45				2.85e-06
	1451.2				2.85e-06
	1453.95				2.85e-06
	1456.7				2.85e-06
	1458.95				2.85e-06
	1461.2				2.85e-06
	1463.45				2.85e-06
	1465.7				2.85e-06
	1468.2				2.85e-06
	1470.7				2.85e-06
	1473.2				2.85e-06
	1475.7				2.85e-06
	1478.2				2.85e-06
	1480.7				2.85e-06
	1483.2				2.85e-06
	1485.7				2.86e-06
	1488.45				2.86e-06
	1491.2				2.86e-06
	1493.95				2.86e-06
	1496.7				2.86e-06
	1498.95				2.86e-06
	1501.2				2.86e-06
	1503.45				2.86e-06
	1505.7				2.86e-06
	1508.2				2.86e-06
	1510.7				2.86e-06
	1513.2				2.86e-06
	1515.7				2.86e-06
	1518.45				2.86e-06
	1521.2				2.86e-06
[truncated: 3,516 more rows]

## Sheet: Panel C
		This is the full dataset, only a subset of these curves are shown on Panel C in Figure 3
		COPASI Modeling data (Exp. = Experimental values, Fit = Fitted Values)
	Time	0 uM Dip1 Exp.	0 uM Dip1 Fit	0.1 uM Dip1 Exp.	0.1 uM Dip1 Fit	0.2 uM Dip1 Exp.	0.2 uM Dip1 Fit	0.4 uM Dip1 Exp.	0.4 uM Dip1 Fit	0.5 uM Dip1 Exp.	0.5 uM Dip1 Fit	0.6 uM Dip1 Exp.	0.6 uM Dip1 Fit	1 uM Dip1 Exp.	1 uM Dip1 Fit	2 uM Dip1 Exp.	2 uM Dip1 Fit	5 uM Dip1 Exp.	5 uM Dip1 Fit	10 uM Dip1 Exp.	10 uM Dip1 Fit	15 uM Dip1 Exp.	15 uM Dip1 Fit
	25	1.63e-08
	36	2.41e-08
	45	3.68e-08
	55	5e-08
	65	5.74e-08
	76	7.33e-08
	85	9.39e-08
	95	1.07e-07
	106	1.28e-07
	115	1.46e-07
	125	1.52e-07
	135	1.71e-07
	146	1.83e-07
	155	2.11e-07
	165	2.25e-07
	176	2.42e-07
	185	2.54e-07
	195	2.81e-07
	205	2.85e-07
	216	3.09e-07
	225	3.31e-07
	235	3.46e-07
	245	3.7e-07
	255	3.85e-07
	265	4.02e-07
	275	4.24e-07
	286	4.45e-07
	295	4.67e-07
	305	4.74e-07
	315	4.91e-07
	325	5.46e-07
	335	5.56e-07
	345	5.85e-07
	356	6.33e-07
	365	6.41e-07
	375	6.66e-07
	385	6.81e-07
	396	7.06e-07
	405	7.16e-07
	415	7.31e-07
	426	7.73e-07
	435	7.93e-07
	445	8.24e-07
	455	8.25e-07
	466	8.42e-07
	475	8.8e-07
	485	9.17e-07
	496	9.49e-07
	505	9.52e-07
	515	1e-06
	525	1e-06
	536	1.02e-06
	545	1.04e-06
	555	1.07e-06
	565	1.11e-06
	575	1.12e-06
	585	1.14e-06
	595	1.17e-06
	606	1.21e-06
	615	1.22e-06
	625	1.24e-06
	635	1.27e-06
	645	1.27e-06
	655	1.32e-06
	665	1.32e-06
	676	1.36e-06
	685	1.36e-06
	695	1.4e-06
	705	1.44e-06
	716	1.44e-06
	725	1.43e-06
	735	1.46e-06
	746	1.47e-06
	755	1.52e-06
	765	1.53e-06
	775	1.56e-06
	786	1.57e-06
	795	1.61e-06
	805	1.61e-06
	816	1.64e-06
	825	1.68e-06
	835	1.72e-06
	845	1.75e-06
	856	1.76e-06
	865	1.73e-06
	875	1.71e-06
	885	1.73e-06
	895	1.73e-06
	905	1.77e-06
	915	1.8e-06
	926	1.81e-06
	935	1.82e-06
	945	1.84e-06
	955	1.88e-06
	965	1.88e-06
	975	1.89e-06
	985	1.91e-06
	996	1.94e-06
	1005	1.95e-06
	1015	1.98e-06
	1025	1.99e-06
	1036	2.04e-06
	1045	2.04e-06
	1055	2.07e-06
	1066	2.11e-06
	1075	2.07e-06
	1085	2.09e-06
	1095	2.08e-06
	1106	2.08e-06
	1115	2.09e-06
	1125	2.11e-06
	1136	2.11e-06
	1145	2.12e-06
	1155	2.14e-06
	1165	2.15e-06
	1176	2.14e-06
	1185	2.16e-06
	1195	2.19e-06
	1205	2.2e-06
	1215	2.19e-06
	1225	2.2e-06
	1235	2.23e-06
	1246	2.25e-06
	1255	2.26e-06
	1265	2.25e-06
	1275	2.28e-06
	1285	2.29e-06
	1295	2.32e-06
	1305	2.32e-06
	1316	2.36e-06
	1325	2.37e-06
	1335	2.36e-06
	1345	2.37e-06
	1356	2.4e-06
	1365	2.41e-06
	1375	2.4e-06
	1386	2.41e-06
	1395	2.44e-06
	1405	2.41e-06
	1415	2.44e-06
	1426	2.47e-06
	1435	2.47e-06
	1445	2.49e-06
	1456	2.5e-06
	1465	2.49e-06
	1475	2.53e-06
	1485	2.51e-06
	1496	2.56e-06
	1505	2.58e-06
	1515	2.58e-06
	1526	2.6e-06
	1535	2.6e-06
	1545	2.61e-06
	1555	2.59e-06
	1566	2.6e-06
	1575	2.61e-06
	1585	2.6e-06
	1595	2.6e-06
	1605	2.64e-06
	1615	2.64e-06
	1625	2.64e-06
	1636	2.64e-06
	1645	2.65e-06
	1655	2.67e-06
	1665	2.65e-06
	1675	2.65e-06
	1685	2.66e-06
	1695	2.66e-06
	1706	2.67e-06
	1715	2.67e-06
	1725	2.67e-06
	1735	2.67e-06
	1746	2.7e-06
	1755	2.7e-06
	1765	2.71e-06
	1776	2.73e-06
	1785	2.71e-06
	1795	2.73e-06
	1805	2.73e-06
	1816	2.73e-06
	1825	2.75e-06
	1835	2.74e-06
	1846	2.75e-06
	1855	2.77e-06
	1865	2.76e-06
	1875	2.73e-06
	1886	2.74e-06
	1895	2.76e-06
	1905	2.74e-06
	1915	2.77e-06
	1925	2.76e-06
	1935	2.75e-06
	1945	2.76e-06
	1956	2.73e-06
	1965	2.75e-06
	1975	2.75e-06
	1985	2.75e-06
	1995	2.76e-06
	2005	2.75e-06
	2015	2.77e-06
	2026	2.76e-06
	2035	2.78e-06
	2045	2.78e-06
	2055	2.78e-06
	2066	2.79e-06
	2075	2.82e-06
	2085	2.81e-06
	2096	2.81e-06
	2105	2.81e-06
	2115	2.8e-06
	2125	2.82e-06
	2136	2.82e-06
	2145	2.83e-06
	2155	2.84e-06
	2166	2.83e-06
	2175	2.83e-06
	2185	2.85e-06
	2195	2.85e-06
	2206	2.87e-06
	2215	2.86e-06
	2225	2.85e-06
	2235	2.89e-06
	2245	2.84e-06
	2255	2.87e-06
	2265	2.87e-06
	2276	2.85e-06
	2285	2.86e-06
	2295	2.87e-06
	2305	2.86e-06
	2315	2.86e-06
	2325	2.9e-06
	2335	2.88e-06
	2346	2.86e-06
	2355	2.89e-06
	2365	2.86e-06
	2375	2.89e-06
	2386	2.9e-06
	2395	2.88e-06
	2405	2.87e-06
	2416	2.89e-06
	2425	2.9e-06
	2435	2.88e-06
	2445	2.88e-06
	2456	2.89e-06
	2465	2.89e-06
	2475	2.89e-06
	25		3.47e-09
	27.75		4.28e-09
	30.5		5.16e-09
	33.25		6.13e-09
	36		7.19e-09
	38.25		8.11e-09
	40.5		9.09e-09
	42.75		1.01e-08
	45		1.12e-08
	47.5		1.25e-08
	50		1.38e-08
	52.5		1.52e-08
	55		1.67e-08
	57.5		1.83e-08
	60		1.99e-08
	62.5		2.15e-08
	65		2.33e-08
	67.75		2.53e-08
	70.5		2.74e-08
	73.25		2.95e-08
	76		3.18e-08
	78.25		3.36e-08
	80.5		3.56e-08
	82.75		3.76e-08
	85		3.96e-08
	87.5		4.19e-08
	90		4.43e-08
	92.5		4.68e-08
	95		4.93e-08
	97.75		5.22e-08
	100.5		5.51e-08
	103.25		5.81e-08
	106		6.12e-08
	108.25		6.37e-08
	110.5		6.64e-08
	112.75		6.9e-08
	115		7.17e-08
	117.5		7.48e-08
	120		7.8e-08
	122.5		8.12e-08
	125		8.44e-08
	127.5		8.77e-08
	130		9.11e-08
	132.5		9.45e-08
	135		9.8e-08
	137.75		1.02e-07
	140.5		1.06e-07
	143.25		1.1e-07
	146		1.14e-07
	148.25		1.17e-07
	150.5		1.21e-07
	152.75		1.24e-07
	155		1.28e-07
	157.5		1.32e-07
	160		1.36e-07
	162.5		1.4e-07
	165		1.44e-07
	167.75		1.49e-07
	170.5		1.53e-07
	173.25		1.58e-07
	176		1.63e-07
	178.25		1.67e-07
	180.5		1.71e-07
	182.75		1.75e-07
	185		1.79e-07
	187.5		1.84e-07
	190		1.88e-07
	192.5		1.93e-07
	195		1.98e-07
	197.5		2.02e-07
	200		2.07e-07
	202.5		2.12e-07
	205		2.17e-07
	207.75		2.22e-07
	210.5		2.28e-07
	213.25		2.33e-07
	216		2.39e-07
	218.25		2.44e-07
	220.5		2.48e-07
	222.75		2.53e-07
	225		2.58e-07
	227.5		2.63e-07
	230		2.68e-07
	232.5		2.74e-07
	235		2.79e-07
	237.5		2.84e-07
	240		2.9e-07
	242.5		2.95e-07
	245		3.01e-07
	247.5		3.06e-07
	250		3.12e-07
	252.5		3.18e-07
	255		3.23e-07
	257.5		3.29e-07
	260		3.35e-07
	262.5		3.4e-07
	265		3.46e-07
	267.5		3.52e-07
	270		3.58e-07
	272.5		3.64e-07
	275		3.7e-07
	277.75		3.76e-07
	280.5		3.83e-07
	283.25		3.89e-07
	286		3.96e-07
	288.25		4.01e-07
	290.5		4.07e-07
	292.75		4.12e-07
	295		4.18e-07
	297.5		4.24e-07
	300		4.3e-07
	302.5		4.36e-07
	305		4.43e-07
	307.5		4.49e-07
	310		4.55e-07
	312.5		4.61e-07
	315		4.68e-07
	317.5		4.74e-07
	320		4.8e-07
	322.5		4.87e-07
	325		4.93e-07
	327.5		4.99e-07
	330		5.06e-07
	332.5		5.12e-07
	335		5.19e-07
	337.5		5.25e-07
	340		5.32e-07
	342.5		5.38e-07
	345		5.45e-07
	347.75		5.52e-07
	350.5		5.59e-07
	353.25		5.66e-07
	356		5.73e-07
	358.25		5.79e-07
	360.5		5.85e-07
	362.75		5.91e-07
	365		5.97e-07
	367.5		6.04e-07
	370		6.1e-07
	372.5		6.17e-07
	375		6.24e-07
	377.5		6.3e-07
	380		6.37e-07
	382.5		6.44e-07
	385		6.5e-07
	387.75		6.58e-07
	390.5		6.65e-07
	393.25		6.73e-07
	396		6.8e-07
	398.25		6.86e-07
	400.5		6.92e-07
	402.75		6.98e-07
	405		7.04e-07
	407.5		7.11e-07
	410		7.18e-07
	412.5		7.24e-07
	415		7.31e-07
	417.75		7.39e-07
	420.5		7.46e-07
	423.25		7.54e-07
	426		7.61e-07
	428.25		7.67e-07
	430.5		7.73e-07
	432.75		7.79e-07
	435		7.85e-07
	437.5		7.92e-07
	440		7.99e-07
	442.5		8.06e-07
	445		8.12e-07
	447.5		8.19e-07
	450		8.26e-07
	452.5		8.33e-07
	455		8.4e-07
	457.75		8.47e-07
	460.5		8.54e-07
	463.25		8.62e-07
	466		8.69e-07
	468.25		8.75e-07
	470.5		8.81e-07
	472.75		8.88e-07
	475		8.94e-07
	477.5		9e-07
	480		9.07e-07
	482.5		9.14e-07
	485		9.21e-07
	487.75		9.28e-07
	490.5		9.35e-07
	493.25		9.43e-07
	496		9.5e-07
	498.25		9.56e-07
	500.5		9.62e-07
	502.75		9.68e-07
	505		9.74e-07
	507.5		9.81e-07
	510		9.88e-07
	512.5		9.94e-07
	515		1e-06
	517.5		1.01e-06
	520		1.01e-06
	522.5		1.02e-06
	525		1.03e-06
	527.75		1.03e-06
	530.5		1.04e-06
	533.25		1.05e-06
	536		1.06e-06
	538.25		1.06e-06
	540.5		1.07e-06
	542.75		1.07e-06
	545		1.08e-06
	547.5		1.09e-06
	550		1.09e-06
	552.5		1.1e-06
	555		1.11e-06
	557.5		1.11e-06
	560		1.12e-06
	562.5		1.13e-06
	565		1.13e-06
	567.5		1.14e-06
	570		1.15e-06
	572.5		1.15e-06
	575		1.16e-06
	577.5		1.16e-06
	580		1.17e-06
	582.5		1.18e-06
	585		1.18e-06
	587.5		1.19e-06
	590		1.2e-06
	592.5		1.2e-06
	595		1.21e-06
	597.75		1.22e-06
	600.5		1.22e-06
	603.25		1.23e-06
	606		1.24e-06
	608.25		1.24e-06
	610.5		1.25e-06
	612.75		1.25e-06
	615		1.26e-06
	617.5		1.26e-06
	620		1.27e-06
	622.5		1.28e-06
	625		1.28e-06
	627.5		1.29e-06
	630		1.3e-06
	632.5		1.3e-06
	635		1.31e-06
	637.5		1.31e-06
	640		1.32e-06
	642.5		1.33e-06
	645		1.33e-06
	647.5		1.34e-06
	650		1.34e-06
	652.5		1.35e-06
	655		1.36e-06
	657.5		1.36e-06
	660		1.37e-06
	662.5		1.37e-06
	665		1.38e-06
	667.75		1.39e-06
	670.5		1.39e-06
	673.25		1.4e-06
	676		1.41e-06
	678.25		1.41e-06
	680.5		1.42e-06
	682.75		1.42e-06
	685		1.43e-06
	687.5		1.43e-06
	690		1.44e-06
	692.5		1.44e-06
	695		1.45e-06
	697.5		1.46e-06
	700		1.46e-06
	702.5		1.47e-06
	705		1.47e-06
	707.75		1.48e-06
	710.5		1.48e-06
	713.25		1.49e-06
	716		1.5e-06
	718.25		1.5e-06
	720.5		1.51e-06
	722.75		1.51e-06
	725		1.52e-06
	727.5		1.52e-06
	730		1.53e-06
	732.5		1.53e-06
	735		1.54e-06
	737.75		1.54e-06
	740.5		1.55e-06
	743.25		1.56e-06
	746		1.56e-06
	748.25		1.57e-06
	750.5		1.57e-06
	752.75		1.58e-06
	755		1.58e-06
	757.5		1.59e-06
	760		1.59e-06
	762.5		1.6e-06
	765		1.6e-06
	767.5		1.61e-06
	770		1.61e-06
	772.5		1.62e-06
	775		1.62e-06
	777.75		1.63e-06
	780.5		1.64e-06
	783.25		1.64e-06
	786		1.65e-06
	788.25		1.65e-06
	790.5		1.66e-06
	792.75		1.66e-06
	795		1.66e-06
	797.5		1.67e-06
	800		1.67e-06
	802.5		1.68e-06
	805		1.68e-06
	807.75		1.69e-06
	810.5		1.7e-06
	813.25		1.7e-06
	816		1.71e-06
	818.25		1.71e-06
	820.5		1.72e-06
	822.75		1.72e-06
	825		1.72e-06
	827.5		1.73e-06
	830		1.73e-06
	832.5		1.74e-06
	835		1.74e-06
	837.5		1.75e-06
	840		1.75e-06
	842.5		1.76e-06
	845		1.76e-06
	847.75		1.77e-06
	850.5		1.77e-06
	853.25		1.78e-06
	856		1.78e-06
	858.25		1.79e-06
	860.5		1.79e-06
	862.75		1.8e-06
	865		1.8e-06
	867.5		1.8e-06
	870		1.81e-06
	872.5		1.81e-06
	875		1.82e-06
	877.5		1.82e-06
	880		1.83e-06
	882.5		1.83e-06
	885		1.84e-06
	887.5		1.84e-06
	890		1.84e-06
	892.5		1.85e-06
	895		1.85e-06
	897.5		1.86e-06
	900		1.86e-06
	902.5		1.87e-06
	905		1.87e-06
	907.5		1.87e-06
	910		1.88e-06
	912.5		1.88e-06
	915		1.89e-06
	917.75		1.89e-06
	920.5		1.9e-06
	923.25		1.9e-06
	926		1.91e-06
	928.25		1.91e-06
	930.5		1.91e-06
	932.75		1.92e-06
	935		1.92e-06
	937.5		1.92e-06
	940		1.93e-06
	942.5		1.93e-06
	945		1.94e-06
	947.5		1.94e-06
	950		1.95e-06
	952.5		1.95e-06
	955		1.95e-06
	957.5		1.96e-06
	960		1.96e-06
	962.5		1.97e-06
	965		1.97e-06
	967.5		1.97e-06
	970		1.98e-06
	972.5		1.98e-06
	975		1.98e-06
	977.5		1.99e-06
	980		1.99e-06
	982.5		2e-06
	985		2e-06
	987.75		2e-06
	990.5		2.01e-06
	993.25		2.01e-06
	996		2.02e-06
	998.25		2.02e-06
	1000.5		2.02e-06
	1002.75		2.03e-06
	1005		2.03e-06
	1007.5		2.03e-06
	1010		2.04e-06
	1012.5		2.04e-06
	1015		2.04e-06
	1017.5		2.05e-06
	1020		2.05e-06
	1022.5		2.06e-06
	1025		2.06e-06
	1027.75		2.06e-06
	1030.5		2.07e-06
	1033.25		2.07e-06
	1036		2.07e-06
	1038.25		2.08e-06
	1040.5		2.08e-06
	1042.75		2.08e-06
	1045		2.09e-06
	1047.5		2.09e-06
	1050		2.09e-06
	1052.5		2.1e-06
	1055		2.1e-06
	1057.75		2.1e-06
	1060.5		2.11e-06
	1063.25		2.11e-06
	1066		2.12e-06
	1068.25		2.12e-06
	1070.5		2.12e-06
	1072.75		2.12e-06
	1075		2.13e-06
	1077.5		2.13e-06
	1080		2.13e-06
	1082.5		2.14e-06
	1085		2.14e-06
	1087.5		2.14e-06
	1090		2.15e-06
	1092.5		2.15e-06
	1095		2.15e-06
	1097.75		2.16e-06
	1100.5		2.16e-06
	1103.25		2.16e-06
	1106		2.17e-06
	1108.25		2.17e-06
	1110.5		2.17e-06
	1112.75		2.18e-06
	1115		2.18e-06
	1117.5		2.18e-06
	1120		2.18e-06
	1122.5		2.19e-06
	1125		2.19e-06
	1127.75		2.19e-06
	1130.5		2.2e-06
	1133.25		2.2e-06
	1136		2.2e-06
	1138.25		2.21e-06
	1140.5		2.21e-06
	1142.75		2.21e-06
	1145		2.21e-06
	1147.5		2.22e-06
	1150		2.22e-06
	1152.5		2.22e-06
	1155		2.23e-06
	1157.5		2.23e-06
	1160		2.23e-06
	1162.5		2.24e-06
	1165		2.24e-06
	1167.75		2.24e-06
	1170.5		2.24e-06
	1173.25		2.25e-06
	1176		2.25e-06
	1178.25		2.25e-06
	1180.5		2.26e-06
	1182.75		2.26e-06
	1185		2.26e-06
	1187.5		2.26e-06
	1190		2.27e-06
	1192.5		2.27e-06
	1195		2.27e-06
	1197.5		2.27e-06
	1200		2.28e-06
	1202.5		2.28e-06
	1205		2.28e-06
	1207.5		2.28e-06
	1210		2.29e-06
	1212.5		2.29e-06
	1215		2.29e-06
	1217.5		2.3e-06
	1220		2.3e-06
	1222.5		2.3e-06
	1225		2.3e-06
	1227.5		2.31e-06
	1230		2.31e-06
	1232.5		2.31e-06
	1235		2.31e-06
	1237.75		2.32e-06
	1240.5		2.32e-06
	1243.25		2.32e-06
	1246		2.32e-06
	1248.25		2.33e-06
	1250.5		2.33e-06
	1252.75		2.33e-06
	1255		2.33e-06
	1257.5		2.34e-06
	1260		2.34e-06
	1262.5		2.34e-06
	1265		2.34e-06
	1267.5		2.34e-06
	1270		2.35e-06
	1272.5		2.35e-06
	1275		2.35e-06
	1277.5		2.35e-06
	1280		2.36e-06
	1282.5		2.36e-06
	1285		2.36e-06
	1287.5		2.36e-06
	1290		2.37e-06
	1292.5		2.37e-06
	1295		2.37e-06
	1297.5		2.37e-06
	1300		2.38e-06
	1302.5		2.38e-06
	1305		2.38e-06
	1307.75		2.38e-06
	1310.5		2.38e-06
	1313.25		2.39e-06
	1316		2.39e-06
	1318.25		2.39e-06
	1320.5		2.39e-06
	1322.75		2.4e-06
	1325		2.4e-06
	1327.5		2.4e-06
	1330		2.4e-06
	1332.5		2.4e-06
	1335		2.41e-06
	1337.5		2.41e-06
	1340		2.41e-06
	1342.5		2.41e-06
	1345		2.41e-06
	1347.75		2.42e-06
	1350.5		2.42e-06
	1353.25		2.42e-06
	1356		2.42e-06
	1358.25		2.42e-06
	1360.5		2.43e-06
	1362.75		2.43e-06
	1365		2.43e-06
	1367.5		2.43e-06
	1370		2.43e-06
	1372.5		2.44e-06
	1375		2.44e-06
	1377.75		2.44e-06
	1380.5		2.44e-06
	1383.25		2.44e-06
	1386		2.45e-06
	1388.25		2.45e-06
	1390.5		2.45e-06
	1392.75		2.45e-06
	1395		2.45e-06
	1397.5		2.46e-06
	1400		2.46e-06
	1402.5		2.46e-06
	1405		2.46e-06
	1407.5		2.46e-06
	1410		2.47e-06
	1412.5		2.47e-06
	1415		2.47e-06
	1417.75		2.47e-06
	1420.5		2.47e-06
	1423.25		2.48e-06
	1426		2.48e-06
	1428.25		2.48e-06
	1430.5		2.48e-06
	1432.75		2.48e-06
	1435		2.48e-06
	1437.5		2.49e-06
	1440		2.49e-06
	1442.5		2.49e-06
	1445		2.49e-06
	1447.75		2.49e-06
	1450.5		2.49e-06
	1453.25		2.5e-06
	1456		2.5e-06
	1458.25		2.5e-06
	1460.5		2.5e-06
	1462.75		2.5e-06
	1465		2.5e-06
	1467.5		2.51e-06
	1470		2.51e-06
	1472.5		2.51e-06
	1475		2.51e-06
	1477.5		2.51e-06
	1480		2.51e-06
	1482.5		2.52e-06
	1485		2.52e-06
	1487.75		2.52e-06
	1490.5		2.52e-06
	1493.25		2.52e-06
	1496		2.52e-06
	1498.25		2.53e-06
	1500.5		2.53e-06
	1502.75		2.53e-06
	1505		2.53e-06
	1507.5		2.53e-06
	1510		2.53e-06
	1512.5		2.54e-06
	1515		2.54e-06
	1517.75		2.54e-06
	1520.5		2.54e-06
	1523.25		2.54e-06
	1526		2.54e-06
	1528.25		2.54e-06
	1530.5		2.55e-06
	1532.75		2.55e-06
	1535		2.55e-06
	1537.5		2.55e-06
	1540		2.55e-06
	1542.5		2.55e-06
	1545		2.55e-06
	1547.5		2.56e-06
	1550		2.56e-06
	1552.5		2.56e-06
	1555		2.56e-06
	1557.75		2.56e-06
	1560.5		2.56e-06
	1563.25		2.57e-06
	1566		2.57e-06
	1568.25		2.57e-06
	1570.5		2.57e-06
	1572.75		2.57e-06
	1575		2.57e-06
	1577.5		2.57e-06
	1580		2.57e-06
	1582.5		2.58e-06
	1585		2.58e-06
	1587.5		2.58e-06
	1590		2.58e-06
	1592.5		2.58e-06
	1595		2.58e-06
	1597.5		2.58e-06
	1600		2.59e-06
	1602.5		2.59e-06
	1605		2.59e-06
	1607.5		2.59e-06
	1610		2.59e-06
	1612.5		2.59e-06
	1615		2.59e-06
	1617.5		2.59e-06
	1620		2.6e-06
	1622.5		2.6e-06
	1625		2.6e-06
	1627.75		2.6e-06
	1630.5		2.6e-06
	1633.25		2.6e-06
	1636		2.6e-06
	1638.25		2.61e-06
	1640.5		2.61e-06
	1642.75		2.61e-06
	1645		2.61e-06
	1647.5		2.61e-06
	1650		2.61e-06
	1652.5		2.61e-06
	1655		2.61e-06
	1657.5		2.61e-06
	1660		2.62e-06
	1662.5		2.62e-06
	1665		2.62e-06
	1667.5		2.62e-06
	1670		2.62e-06
	1672.5		2.62e-06
	1675		2.62e-06
	1677.5		2.62e-06
	1680		2.62e-06
	1682.5		2.63e-06
	1685		2.63e-06
	1687.5		2.63e-06
	1690		2.63e-06
	1692.5		2.63e-06
	1695		2.63e-06
	1697.75		2.63e-06
	1700.5		2.63e-06
	1703.25		2.64e-06
	1706		2.64e-06
	1708.25		2.64e-06
	1710.5		2.64e-06
	1712.75		2.64e-06
	1715		2.64e-06
	1717.5		2.64e-06
	1720		2.64e-06
	1722.5		2.64e-06
	1725		2.64e-06
	1727.5		2.65e-06
	1730		2.65e-06
	1732.5		2.65e-06
	1735		2.65e-06
	1737.75		2.65e-06
	1740.5		2.65e-06
	1743.25		2.65e-06
	1746		2.65e-06
	1748.25		2.65e-06
	1750.5		2.66e-06
	1752.75		2.66e-06
	1755		2.66e-06
	1757.5		2.66e-06
	1760		2.66e-06
	1762.5		2.66e-06
	1765		2.66e-06
	1767.75		2.66e-06
	1770.5		2.66e-06
	1773.25		2.66e-06
	1776		2.67e-06
	1778.25		2.67e-06
	1780.5		2.67e-06
	1782.75		2.67e-06
	1785		2.67e-06
	1787.5		2.67e-06
	1790		2.67e-06
	1792.5		2.67e-06
	1795		2.67e-06
	1797.5		2.67e-06
	1800		2.67e-06
	1802.5		2.68e-06
	1805		2.68e-06
	1807.75		2.68e-06
	1810.5		2.68e-06
	1813.25		2.68e-06
	1816		2.68e-06
	1818.25		2.68e-06
	1820.5		2.68e-06
	1822.75		2.68e-06
	1825		2.68e-06
	1827.5		2.68e-06
	1830		2.69e-06
	1832.5		2.69e-06
	1835		2.69e-06
	1837.75		2.69e-06
	1840.5		2.69e-06
	1843.25		2.69e-06
	1846		2.69e-06
	1848.25		2.69e-06
	1850.5		2.69e-06
	1852.75		2.69e-06
	1855		2.69e-06
	1857.5		2.69e-06
	1860		2.7e-06
	1862.5		2.7e-06
	1865		2.7e-06
	1867.5		2.7e-06
	1870		2.7e-06
	1872.5		2.7e-06
	1875		2.7e-06
	1877.75		2.7e-06
	1880.5		2.7e-06
	1883.25		2.7e-06
	1886		2.7e-06
	1888.25		2.7e-06
	1890.5		2.71e-06
	1892.75		2.71e-06
	1895		2.71e-06
	1897.5		2.71e-06
	1900		2.71e-06
	1902.5		2.71e-06
	1905		2.71e-06
	1907.5		2.71e-06
	1910		2.71e-06
	1912.5		2.71e-06
	1915		2.71e-06
	1917.5		2.71e-06
	1920		2.71e-06
	1922.5		2.72e-06
	1925		2.72e-06
	1927.5		2.72e-06
	1930		2.72e-06
	1932.5		2.72e-06
	1935		2.72e-06
	1937.5		2.72e-06
	1940		2.72e-06
	1942.5		2.72e-06
	1945		2.72e-06
	1947.75		2.72e-06
	1950.5		2.72e-06
	1953.25		2.72e-06
	1956		2.73e-06
	1958.25		2.73e-06
	1960.5		2.73e-06
	1962.75		2.73e-06
	1965		2.73e-06
	1967.5		2.73e-06
	1970		2.73e-06
	1972.5		2.73e-06
	1975		2.73e-06
	1977.5		2.73e-06
	1980		2.73e-06
	1982.5		2.73e-06
	1985		2.73e-06
	1987.5		2.73e-06
	1990		2.73e-06
	1992.5		2.74e-06
	1995		2.74e-06
	1997.5		2.74e-06
	2000		2.74e-06
	2002.5		2.74e-06
	2005		2.74e-06
	2007.5		2.74e-06
	2010		2.74e-06
	2012.5		2.74e-06
	2015		2.74e-06
	2017.75		2.74e-06
	2020.5		2.74e-06
	2023.25		2.74e-06
	2026		2.74e-06
	2028.25		2.74e-06
	2030.5		2.74e-06
	2032.75		2.75e-06
	2035		2.75e-06
	2037.5		2.75e-06
	2040		2.75e-06
	2042.5		2.75e-06
	2045		2.75e-06
	2047.5		2.75e-06
	2050		2.75e-06
	2052.5		2.75e-06
	2055		2.75e-06
	2057.75		2.75e-06
	2060.5		2.75e-06
	2063.25		2.75e-06
	2066		2.75e-06
	2068.25		2.75e-06
	2070.5		2.75e-06
	2072.75		2.75e-06
	2075		2.76e-06
	2077.5		2.76e-06
	2080		2.76e-06
	2082.5		2.76e-06
	2085		2.76e-06
	2087.75		2.76e-06
	2090.5		2.76e-06
	2093.25		2.76e-06
	2096		2.76e-06
	2098.25		2.76e-06
	2100.5		2.76e-06
	2102.75		2.76e-06
	2105		2.76e-06
	2107.5		2.76e-06
	2110		2.76e-06
	2112.5		2.76e-06
	2115		2.76e-06
	2117.5		2.76e-06
	2120		2.76e-06
	2122.5		2.77e-06
	2125		2.77e-06
	2127.75		2.77e-06
	2130.5		2.77e-06
	2133.25		2.77e-06
	2136		2.77e-06
	2138.25		2.77e-06
	2140.5		2.77e-06
	2142.75		2.77e-06
	2145		2.77e-06
	2147.5		2.77e-06
	2150		2.77e-06
	2152.5		2.77e-06
	2155		2.77e-06
	2157.75		2.77e-06
	2160.5		2.77e-06
	2163.25		2.77e-06
	2166		2.77e-06
	2168.25		2.77e-06
	2170.5		2.77e-06
	2172.75		2.78e-06
	2175		2.78e-06
	2177.5		2.78e-06
	2180		2.78e-06
	2182.5		2.78e-06
	2185		2.78e-06
	2187.5		2.78e-06
	2190		2.78e-06
	2192.5		2.78e-06
	2195		2.78e-06
	2197.75		2.78e-06
	2200.5		2.78e-06
	2203.25		2.78e-06
	2206		2.78e-06
	2208.25		2.78e-06
	2210.5		2.78e-06
	2212.75		2.78e-06
	2215		2.78e-06
	2217.5		2.78e-06
	2220		2.78e-06
	2222.5		2.78e-06
	2225		2.78e-06
	2227.5		2.79e-06
	2230		2.79e-06
	2232.5		2.79e-06
	2235		2.79e-06
	2237.5		2.79e-06
	2240		2.79e-06
	2242.5		2.79e-06
	2245		2.79e-06
	2247.5		2.79e-06
	2250		2.79e-06
	2252.5		2.79e-06
	2255		2.79e-06
	2257.5		2.79e-06
	2260		2.79e-06
	2262.5		2.79e-06
	2265		2.79e-06
	2267.75		2.79e-06
	2270.5		2.79e-06
	2273.25		2.79e-06
	2276		2.79e-06
	2278.25		2.79e-06
	2280.5		2.79e-06
	2282.75		2.79e-06
	2285		2.79e-06
	2287.5		2.79e-06
	2290		2.8e-06
	2292.5		2.8e-06
	2295		2.8e-06
	2297.5		2.8e-06
	2300		2.8e-06
	2302.5		2.8e-06
	2305		2.8e-06
	2307.5		2.8e-06
	2310		2.8e-06
	2312.5		2.8e-06
	2315		2.8e-06
	2317.5		2.8e-06
	2320		2.8e-06
	2322.5		2.8e-06
	2325		2.8e-06
	2327.5		2.8e-06
	2330		2.8e-06
	2332.5		2.8e-06
	2335		2.8e-06
	2337.75		2.8e-06
	2340.5		2.8e-06
	2343.25		2.8e-06
	2346		2.8e-06
	2348.25		2.8e-06
	2350.5		2.8e-06
	2352.75		2.8e-06
	2355		2.8e-06
	2357.5		2.81e-06
	2360		2.81e-06
	2362.5		2.81e-06
	2365		2.81e-06
	2367.5		2.81e-06
	2370		2.81e-06
	2372.5		2.81e-06
	2375		2.81e-06
	2377.75		2.81e-06
	2380.5		2.81e-06
	2383.25		2.81e-06
	2386		2.81e-06
	2388.25		2.81e-06
	2390.5		2.81e-06
	2392.75		2.81e-06
	2395		2.81e-06
	2397.5		2.81e-06
	2400		2.81e-06
	2402.5		2.81e-06
	2405		2.81e-06
	2407.75		2.81e-06
	2410.5		2.81e-06
	2413.25		2.81e-06
	2416		2.81e-06
	2418.25		2.81e-06
	2420.5		2.81e-06
	2422.75		2.81e-06
	2425		2.81e-06
	2427.5		2.81e-06
	2430		2.81e-06
	2432.5		2.81e-06
	2435		2.81e-06
	2437.5		2.82e-06
	2440		2.82e-06
	2442.5		2.82e-06
	2445		2.82e-06
	2447.75		2.82e-06
	2450.5		2.82e-06
	2453.25		2.82e-06
	2456		2.82e-06
	2458.25		2.82e-06
	2460.5		2.82e-06
	2462.75		2.82e-06
	2465		2.82e-06
	2467.5		2.82e-06
	2470		2.82e-06
	2472.5		2.82e-06
	2475		2.82e-06
	2475		2.82e-06
	25.67			3.14e-09
	36.67			1.65e-08
	45.67			2.71e-08
	55.67			3.57e-08
	65.67			4.63e-08
	76.67			6.43e-08
	85.67			7.72e-08
	95.67			9.27e-08
	106.67			1.23e-07
	115.67			1.32e-07
	125.67			1.61e-07
	135.67			1.91e-07
	146.67			2.09e-07
	155.67			2.4e-07
	165.67			2.66e-07
	176.67			3.09e-07
	185.67			3.22e-07
	195.67			3.64e-07
	205.67			3.94e-07
	216.67			4.42e-07
	225.67			4.67e-07
	235.67			4.96e-07
	245.67			5.42e-07
	255.67			5.85e-07
	265.67			6.18e-07
	275.67			6.5e-07
	286.67			6.97e-07
	295.67			7.31e-07
	305.67			7.78e-07
	315.67			8.08e-07
	325.67			8.58e-07
	335.67			8.91e-07
	345.67			9.44e-07
	356.67			9.81e-07
	365.67			1.01e-06
	375.67			1.05e-06
	385.67			1.08e-06
	396.67			1.14e-06
	405.67			1.17e-06
	415.67			1.23e-06
	426.67			1.25e-06
	435.67			1.29e-06
	445.67			1.32e-06
	455.67			1.36e-06
	466.67			1.39e-06
	475.67			1.41e-06
	485.67			1.45e-06
	496.67			1.49e-06
	505.67			1.52e-06
	515.67			1.56e-06
	525.67			1.59e-06
	536.67			1.63e-06
	545.67			1.67e-06
	555.67			1.7e-06
	565.67			1.73e-06
	575.67			1.76e-06
	585.67			1.81e-06
	595.67			1.83e-06
	606.67			1.86e-06
	615.67			1.9e-06
	625.67			1.92e-06
	635.67			1.93e-06
	645.67			1.97e-06
	655.67			2.01e-06
	665.67			2.02e-06
	676.67			2.07e-06
	685.67			2.09e-06
	695.67			2.11e-06
	705.67			2.13e-06
	716.67			2.16e-06
	725.67			2.18e-06
	735.67			2.19e-06
	746.67			2.22e-06
	755.67			2.24e-06
	765.67			2.25e-06
	775.67			2.28e-06
	786.67			2.3e-06
	795.67			2.31e-06
	805.67			2.33e-06
	816.67			2.36e-06
	825.67			2.38e-06
	835.67			2.38e-06
	845.67			2.39e-06
	856.67			2.41e-06
	865.67			2.41e-06
	875.67			2.44e-06
	885.67			2.47e-06
	895.67			2.47e-06
	905.67			2.49e-06
	915.67			2.49e-06
	926.67			2.51e-06
	935.67			2.52e-06
	945.67			2.55e-06
	955.67			2.54e-06
	965.67			2.57e-06
	975.67			2.57e-06
	985.67			2.58e-06
	996.67			2.6e-06
	1005.7			2.6e-06
	1015.7			2.63e-06
	1025.7			2.6e-06
	1036.7			2.62e-06
	1045.7			2.65e-06
	1055.7			2.67e-06
	1066.7			2.67e-06
	1075.7			2.66e-06
	1085.7			2.68e-06
	1095.7			2.7e-06
	1106.7			2.69e-06
	1115.7			2.7e-06
	1125.7			2.71e-06
	1136.7			2.73e-06
	1145.7			2.71e-06
	1155.7			2.72e-06
	1165.7			2.74e-06
	1176.7			2.74e-06
	1185.7			2.76e-06
	1195.7			2.76e-06
	1205.7			2.76e-06
	1215.7			2.77e-06
	1225.7			2.75e-06
	1235.7			2.78e-06
	1246.7			2.79e-06
	1255.7			2.77e-06
	1265.7			2.78e-06
	1275.7			2.8e-06
	1285.7			2.78e-06
	1295.7			2.82e-06
	1305.7			2.83e-06
	1316.7			2.81e-06
	1325.7			2.84e-06
	1335.7			2.83e-06
	1345.7			2.83e-06
	1356.7			2.83e-06
	1365.7			2.82e-06
	1375.7			2.82e-06
	1386.7			2.83e-06
	1395.7			2.83e-06
	1405.7			2.83e-06
	1415.7			2.85e-06
	1426.7			2.85e-06
	1435.7			2.86e-06
	1445.7			2.84e-06
	1456.7			2.9e-06
	1465.7			2.87e-06
	1475.7			2.88e-06
	1485.7			2.87e-06
	1496.7			2.87e-06
	1505.7			2.87e-06
	1515.7			2.88e-06
	1526.7			2.88e-06
	1535.7			2.89e-06
	1545.7			2.89e-06
	1555.7			2.89e-06
	1566.7			2.89e-06
	1575.7			2.89e-06
	1585.7			2.89e-06
	1595.7			2.87e-06
	1605.7			2.88e-06
	1615.7			2.86e-06
	1625.7			2.87e-06
	1636.7			2.89e-06
	1645.7			2.87e-06
	1655.7			2.89e-06
	1665.7			2.87e-06
	1675.7			2.89e-06
	1685.7			2.87e-06
	1695.7			2.9e-06
	1706.7			2.89e-06
	1715.7			2.88e-06
	25.67				7.21e-09
	28.42				8.83e-09
	31.17				1.06e-08
	33.92				1.26e-08
	36.67				1.47e-08
	38.92				1.65e-08
	41.17				1.85e-08
	43.42				2.06e-08
	45.67				2.27e-08
	48.17				2.53e-08
	50.67				2.8e-08
	53.17				3.08e-08
	55.67				3.37e-08
	58.17				3.68e-08
	60.67				4e-08
	63.17				4.33e-08
	65.67				4.67e-08
	68.42				5.07e-08
	71.17				5.48e-08
	73.92				5.9e-08
	76.67				6.34e-08
	78.92				6.71e-08
	81.17				7.09e-08
	83.42				7.48e-08
	85.67				7.88e-08
	88.17				8.34e-08
	90.67				8.81e-08
	93.17				9.29e-08
	95.67				9.78e-08
	98.42				1.03e-07
	101.17				1.09e-07
	103.92				1.15e-07
	106.67				1.21e-07
	108.92				1.26e-07
	111.17				1.31e-07
	113.42				1.36e-07
	115.67				1.41e-07
	118.17				1.47e-07
	120.67				1.53e-07
	123.17				1.59e-07
	125.67				1.66e-07
	128.17				1.72e-07
	130.67				1.78e-07
	133.17				1.85e-07
	135.67				1.91e-07
	138.42				1.99e-07
	141.17				2.06e-07
	143.92				2.14e-07
	146.67				2.22e-07
	148.92				2.28e-07
	151.17				2.35e-07
	153.42				2.41e-07
	155.67				2.48e-07
	158.17				2.55e-07
	160.67				2.63e-07
	163.17				2.7e-07
	165.67				2.78e-07
	168.42				2.87e-07
	171.17				2.95e-07
	173.92				3.04e-07
	176.67				3.13e-07
	178.92				3.2e-07
	181.17				3.28e-07
	183.42				3.35e-07
	185.67				3.43e-07
	188.17				3.51e-07
	190.67				3.59e-07
	193.17				3.68e-07
	195.67				3.77e-07
	198.17				3.85e-07
	200.67				3.94e-07
	203.17				4.03e-07
	205.67				4.11e-07
	208.42				4.21e-07
	211.17				4.31e-07
	213.92				4.41e-07
	216.67				4.51e-07
	218.92				4.59e-07
	221.17				4.67e-07
	223.42				4.76e-07
	225.67				4.84e-07
	228.17				4.93e-07
	230.67				5.03e-07
	233.17				5.12e-07
	235.67				5.21e-07
	238.17				5.31e-07
	240.67				5.4e-07
	243.17				5.5e-07
	245.67				5.6e-07
	248.17				5.69e-07
	250.67				5.79e-07
	253.17				5.89e-07
	255.67				5.98e-07
	258.17				6.08e-07
	260.67				6.18e-07
	263.17				6.28e-07
	265.67				6.38e-07
	268.17				6.47e-07
	270.67				6.57e-07
	273.17				6.67e-07
	275.67				6.77e-07
	278.42				6.88e-07
	281.17				6.99e-07
	283.92				7.1e-07
	286.67				7.21e-07
	288.92				7.3e-07
	291.17				7.39e-07
	293.42				7.48e-07
	295.67				7.57e-07
	298.17				7.68e-07
	300.67				7.78e-07
	303.17				7.88e-07
	305.67				7.98e-07
	308.17				8.08e-07
	310.67				8.18e-07
	313.17				8.28e-07
	315.67				8.38e-07
	318.17				8.49e-07
	320.67				8.59e-07
	323.17				8.69e-07
	325.67				8.79e-07
	328.17				8.89e-07
	330.67				9e-07
	333.17				9.1e-07
	335.67				9.2e-07
	338.17				9.3e-07
	340.67				9.4e-07
	343.17				9.5e-07
	345.67				9.6e-07
	348.42				9.72e-07
	351.17				9.83e-07
	353.92				9.94e-07
	356.67				1.01e-06
	358.92				1.01e-06
	361.17				1.02e-06
	363.42				1.03e-06
	365.67				1.04e-06
	368.17				1.05e-06
	370.67				1.06e-06
	373.17				1.07e-06
	375.67				1.08e-06
	378.17				1.09e-06
	380.67				1.1e-06
	383.17				1.11e-06
	385.67				1.12e-06
	388.42				1.13e-06
	391.17				1.14e-06
	393.92				1.15e-06
	396.67				1.16e-06
	398.92				1.17e-06
	401.17				1.18e-06
	403.42				1.19e-06
	405.67				1.2e-06
	408.17				1.21e-06
	410.67				1.22e-06
	413.17				1.23e-06
	415.67				1.24e-06
	418.42				1.25e-06
	421.17				1.26e-06
	423.92				1.27e-06
	426.67				1.28e-06
	428.92				1.29e-06
	431.17				1.3e-06
	433.42				1.31e-06
	435.67				1.32e-06
	438.17				1.33e-06
	440.67				1.33e-06
	443.17				1.34e-06
	445.67				1.35e-06
	448.17				1.36e-06
	450.67				1.37e-06
	453.17				1.38e-06
	455.67				1.39e-06
	458.42				1.4e-06
	461.17				1.41e-06
	463.92				1.42e-06
	466.67				1.43e-06
	468.92				1.44e-06
	471.17				1.45e-06
	473.42				1.46e-06
	475.67				1.46e-06
	478.17				1.47e-06
	480.67				1.48e-06
	483.17				1.49e-06
	485.67				1.5e-06
	488.42				1.51e-06
	491.17				1.52e-06
	493.92				1.53e-06
	496.67				1.54e-06
	498.92				1.55e-06
	501.17				1.55e-06
	503.42				1.56e-06
	505.67				1.57e-06
	508.17				1.58e-06
	510.67				1.59e-06
	513.17				1.59e-06
	515.67				1.6e-06
	518.17				1.61e-06
	520.67				1.62e-06
	523.17				1.63e-06
	525.67				1.64e-06
	528.42				1.64e-06
	531.17				1.65e-06
	533.92				1.66e-06
	536.67				1.67e-06
	538.92				1.68e-06
	541.17				1.69e-06
	543.42				1.69e-06
	545.67				1.7e-06
	548.17				1.71e-06
	550.67				1.72e-06
	553.17				1.72e-06
	555.67				1.73e-06
	558.17				1.74e-06
	560.67				1.75e-06
	563.17				1.75e-06
	565.67				1.76e-06
	568.17				1.77e-06
	570.67				1.78e-06
	573.17				1.79e-06
	575.67				1.79e-06
	578.17				1.8e-06
	580.67				1.81e-06
	583.17				1.82e-06
	585.67				1.82e-06
	588.17				1.83e-06
	590.67				1.84e-06
	593.17				1.84e-06
	595.67				1.85e-06
	598.42				1.86e-06
	601.17				1.87e-06
	603.92				1.87e-06
	606.67				1.88e-06
	608.92				1.89e-06
	611.17				1.9e-06
	613.42				1.9e-06
	615.67				1.91e-06
	618.17				1.91e-06
	620.67				1.92e-06
	623.17				1.93e-06
	625.67				1.93e-06
	628.17				1.94e-06
	630.67				1.95e-06
	633.17				1.95e-06
	635.67				1.96e-06
	638.17				1.97e-06
	640.67				1.97e-06
	643.17				1.98e-06
	645.67				1.99e-06
	648.17				1.99e-06
	650.67				2e-06
	653.17				2.01e-06
	655.67				2.01e-06
	658.17				2.02e-06
	660.67				2.02e-06
	663.17				2.03e-06
	665.67				2.04e-06
	668.42				2.04e-06
	671.17				2.05e-06
	673.92				2.06e-06
	676.67				2.06e-06
	678.92				2.07e-06
	681.17				2.07e-06
	683.42				2.08e-06
	685.67				2.08e-06
	688.17				2.09e-06
	690.67				2.1e-06
	693.17				2.1e-06
	695.67				2.11e-06
	698.17				2.11e-06
	700.67				2.12e-06
	703.17				2.12e-06
	705.67				2.13e-06
	708.42				2.14e-06
	711.17				2.14e-06
	713.92				2.15e-06
	716.67				2.15e-06
	718.92				2.16e-06
	721.17				2.16e-06
	723.42				2.17e-06
	725.67				2.17e-06
	728.17				2.18e-06
	730.67				2.18e-06
	733.17				2.19e-06
	735.67				2.19e-06
	738.42				2.2e-06
	741.17				2.2e-06
	743.92				2.21e-06
	746.67				2.22e-06
	748.92				2.22e-06
	751.17				2.22e-06
	753.42				2.23e-06
	755.67				2.23e-06
	758.17				2.24e-06
	760.67				2.24e-06
	763.17				2.25e-06
	765.67				2.25e-06
	768.17				2.26e-06
	770.67				2.26e-06
	773.17				2.27e-06
	775.67				2.27e-06
	778.42				2.28e-06
	781.17				2.28e-06
	783.92				2.29e-06
	786.67				2.29e-06
	788.92				2.3e-06
	791.17				2.3e-06
	793.42				2.3e-06
	795.67				2.31e-06
	798.17				2.31e-06
	800.67				2.32e-06
	803.17				2.32e-06
	805.67				2.32e-06
	808.42				2.33e-06
	811.17				2.33e-06
	813.92				2.34e-06
	816.67				2.34e-06
	818.92				2.35e-06
	821.17				2.35e-06
	823.42				2.35e-06
	825.67				2.36e-06
	828.17				2.36e-06
	830.67				2.37e-06
	833.17				2.37e-06
	835.67				2.37e-06
	838.17				2.38e-06
	840.67				2.38e-06
	843.17				2.38e-06
	845.67				2.39e-06
	848.42				2.39e-06
	851.17				2.4e-06
	853.92				2.4e-06
	856.67				2.4e-06
	858.92				2.41e-06
	861.17				2.41e-06
	863.42				2.41e-06
	865.67				2.42e-06
	868.17				2.42e-06
	870.67				2.42e-06
	873.17				2.43e-06
	875.67				2.43e-06
	878.17				2.44e-06
	880.67				2.44e-06
	883.17				2.44e-06
	885.67				2.45e-06
	888.17				2.45e-06
	890.67				2.45e-06
	893.17				2.46e-06
	895.67				2.46e-06
	898.17				2.46e-06
	900.67				2.47e-06
	903.17				2.47e-06
	905.67				2.47e-06
	908.17				2.47e-06
	910.67				2.48e-06
	913.17				2.48e-06
	915.67				2.48e-06
	918.42				2.49e-06
	921.17				2.49e-06
	923.92				2.49e-06
	926.67				2.5e-06
	928.92				2.5e-06
	931.17				2.5e-06
	933.42				2.51e-06
	935.67				2.51e-06
	938.17				2.51e-06
	940.67				2.51e-06
	943.17				2.52e-06
	945.67				2.52e-06
	948.17				2.52e-06
	950.67				2.53e-06
	953.17				2.53e-06
	955.67				2.53e-06
	958.17				2.53e-06
	960.67				2.54e-06
	963.17				2.54e-06
	965.67				2.54e-06
	968.17				2.54e-06
	970.67				2.55e-06
	973.17				2.55e-06
	975.67				2.55e-06
	978.17				2.55e-06
	980.67				2.56e-06
	983.17				2.56e-06
	985.67				2.56e-06
	988.42				2.57e-06
	991.17				2.57e-06
	993.92				2.57e-06
	996.67				2.57e-06
	998.928				2.58e-06
	1001.18				2.58e-06
	1003.44				2.58e-06
	1005.7				2.58e-06
	1008.2				2.58e-06
	1010.7				2.59e-06
	1013.2				2.59e-06
	1015.7				2.59e-06
	1018.2				2.59e-06
	1020.7				2.6e-06
	1023.2				2.6e-06
	1025.7				2.6e-06
	1028.45				2.6e-06
	1031.2				2.61e-06
	1033.95				2.61e-06
	1036.7				2.61e-06
	1038.95				2.61e-06
	1041.2				2.61e-06
	1043.45				2.62e-06
	1045.7				2.62e-06
	1048.2				2.62e-06
	1050.7				2.62e-06
	1053.2				2.62e-06
	1055.7				2.63e-06
	1058.45				2.63e-06
	1061.2				2.63e-06
	1063.95				2.63e-06
	1066.7				2.63e-06
	1068.95				2.64e-06
	1071.2				2.64e-06
	1073.45				2.64e-06
	1075.7				2.64e-06
	1078.2				2.64e-06
	1080.7				2.65e-06
	1083.2				2.65e-06
	1085.7				2.65e-06
	1088.2				2.65e-06
	1090.7				2.65e-06
	1093.2				2.65e-06
	1095.7				2.66e-06
	1098.45				2.66e-06
	1101.2				2.66e-06
	1103.95				2.66e-06
	1106.7				2.66e-06
	1108.95				2.67e-06
	1111.2				2.67e-06
	1113.45				2.67e-06
	1115.7				2.67e-06
	1118.2				2.67e-06
	1120.7				2.67e-06
	1123.2				2.68e-06
	1125.7				2.68e-06
	1128.45				2.68e-06
	1131.2				2.68e-06
	1133.95				2.68e-06
	1136.7				2.68e-06
	1138.95				2.69e-06
	1141.2				2.69e-06
	1143.45				2.69e-06
	1145.7				2.69e-06
	1148.2				2.69e-06
	1150.7				2.69e-06
	1153.2				2.69e-06
	1155.7				2.7e-06
	1158.2				2.7e-06
	1160.7				2.7e-06
	1163.2				2.7e-06
	1165.7				2.7e-06
	1168.45				2.7e-06
	1171.2				2.7e-06
	1173.95				2.71e-06
	1176.7				2.71e-06
	1178.95				2.71e-06
	1181.2				2.71e-06
	1183.45				2.71e-06
	1185.7				2.71e-06
	1188.2				2.71e-06
	1190.7				2.72e-06
	1193.2				2.72e-06
	1195.7				2.72e-06
	1198.2				2.72e-06
	1200.7				2.72e-06
	1203.2				2.72e-06
	1205.7				2.72e-06
	1208.2				2.72e-06
	1210.7				2.73e-06
	1213.2				2.73e-06
	1215.7				2.73e-06
	1218.2				2.73e-06
	1220.7				2.73e-06
	1223.2				2.73e-06
	1225.7				2.73e-06
	1228.2				2.73e-06
	1230.7				2.74e-06
	1233.2				2.74e-06
	1235.7				2.74e-06
	1238.45				2.74e-06
	1241.2				2.74e-06
	1243.95				2.74e-06
	1246.7				2.74e-06
	1248.95				2.74e-06
	1251.2				2.74e-06
	1253.45				2.75e-06
	1255.7				2.75e-06
	1258.2				2.75e-06
	1260.7				2.75e-06
	1263.2				2.75e-06
	1265.7				2.75e-06
	1268.2				2.75e-06
	1270.7				2.75e-06
	1273.2				2.75e-06
	1275.7				2.76e-06
	1278.2				2.76e-06
	1280.7				2.76e-06
	1283.2				2.76e-06
	1285.7				2.76e-06
	1288.2				2.76e-06
	1290.7				2.76e-06
	1293.2				2.76e-06
	1295.7				2.76e-06
	1298.2				2.76e-06
	1300.7				2.76e-06
	1303.2				2.77e-06
	1305.7				2.77e-06
	1308.45				2.77e-06
	1311.2				2.77e-06
	1313.95				2.77e-06
	1316.7				2.77e-06
	1318.95				2.77e-06
	1321.2				2.77e-06
	1323.45				2.77e-06
	1325.7				2.77e-06
	1328.2				2.77e-06
	1330.7				2.78e-06
	1333.2				2.78e-06
	1335.7				2.78e-06
	1338.2				2.78e-06
	1340.7				2.78e-06
	1343.2				2.78e-06
	1345.7				2.78e-06
	1348.45				2.78e-06
	1351.2				2.78e-06
	1353.95				2.78e-06
	1356.7				2.78e-06
	1358.95				2.78e-06
	1361.2				2.79e-06
	1363.45				2.79e-06
	1365.7				2.79e-06
	1368.2				2.79e-06
	1370.7				2.79e-06
	1373.2				2.79e-06
	1375.7				2.79e-06
	1378.45				2.79e-06
	1381.2				2.79e-06
	1383.95				2.79e-06
	1386.7				2.79e-06
	1388.95				2.79e-06
	1391.2				2.79e-06
	1393.45				2.8e-06
	1395.7				2.8e-06
	1398.2				2.8e-06
	1400.7				2.8e-06
	1403.2				2.8e-06
	1405.7				2.8e-06
	1408.2				2.8e-06
	1410.7				2.8e-06
	1413.2				2.8e-06
	1415.7				2.8e-06
	1418.45				2.8e-06
	1421.2				2.8e-06
	1423.95				2.8e-06
	1426.7				2.8e-06
	1428.95				2.8e-06
	1431.2				2.8e-06
	1433.45				2.81e-06
	1435.7				2.81e-06
	1438.2				2.81e-06
	1440.7				2.81e-06
	1443.2				2.81e-06
	1445.7				2.81e-06
	1448.45				2.81e-06
	1451.2				2.81e-06
	1453.95				2.81e-06
	1456.7				2.81e-06
	1458.95				2.81e-06
	1461.2				2.81e-06
	1463.45				2.81e-06
	1465.7				2.81e-06
	1468.2				2.81e-06
	1470.7				2.81e-06
	1473.2				2.81e-06
	1475.7				2.82e-06
	1478.2				2.82e-06
	1480.7				2.82e-06
	1483.2				2.82e-06
	1485.7				2.82e-06
	1488.45				2.82e-06
	1491.2				2.82e-06
	1493.95				2.82e-06
	1496.7				2.82e-06
	1498.95				2.82e-06
	1501.2				2.82e-06
	1503.45				2.82e-06
	1505.7				2.82e-06
	1508.2				2.82e-06
	1510.7				2.82e-06
	1513.2				2.82e-06
	1515.7				2.82e-06
	1518.45				2.82e-06
	1521.2				2.82e-06
[truncated: 3,516 more rows]

## Sheet: Panel E
	Fluorescence data from actin polymerization time courses
	Time (sec)	10nM Arp2/3 + 10uM Dip1	10nM Arp2/3 + 1uM Dip1	+ 10uM Dip1 + 1uM VCA	+ 1uM Dip1 + 1uM VCA	+ 10uM Dip1 + 1uM CA	+ 1uM Dip1 + 1uM CA
	0	826	692
	10	969	722
	21	1220	770
	30	1527	826
	40	1901	885
	50	2355	971
	61	2896	1065
	70	3407	1207
	80	3832	1330
	91	4446	1506
	100	4907	1685
	110	5302	1855
	120	5727	2074
	131	6157	2293
	140	6437	2501
	150	6838	2746
	161	7189	2990
	170	7410	3204
	180	7666	3406
	190	7907	3623
	201	8101	3859
	210	8284	4084
	220	8468	4333
	230	8653	4493
	240	8779	4750
	250	8912	4912
	260	8965	5095
	271	9131	5298
	280	9219	5515
	290	9288	5668
	300	9347	5842
	310	9407	5983
	320	9515	6226
	330	9559	6314
	341	9581	6500
	350	9657	6649
	360	9661	6757
	370	9710	6913
	381	9679	7011
	390	9749	7146
	400	9737	7266
	411	9749	7390
	420	9786	7523
	430	9728	7535
	440	9775	7673
	451	9768	7786
	460	9775	7856
	470	9742	8024
	481	9836	8137
	490	9815	8145
	500	9781	8222
	510	9780	8306
	521	9776	8332
	530	9798	8452
	540	9741	8416
	550	9732	8524
	560	9780	8630
	570	9780	8599
	580	9784	8712
	591	9758	8684
	600	9723	8821
	610	9777	8854
	620	9737	8915
	630	9755	8975
	640	9756	8962
	650	9790	9022
	661	9761	9068
	670	9779	9150
	680	9754	9145
	690	9754	9170
	701	9770	9189
	710	9714	9281
	720	9773	9281
	731	9785	9298
	740	9798	9362
	750	9778	9327
	760	9754	9338
	771	9736	9365
	780	9790	9393
	790	9724	9413
	801	9722	9451
	810	9773	9469
	820	9756	9535
	830	9727	9561
	841	9663	9479
	850	9709	9533
	860	9753	9576
	870	9737	9499
	880	9775	9574
	890	9750	9553
	900	9752	9572
	911	9759	9577
	920	9853	9601
	930	9745	9572
	940	9733	9583
	950	9718	9611
	960	9770	9572
	970	9782	9572
	981	9796	9632
	990	9745	9571
	1000	9818	9582
	1010	9770	9594
	1020	9786	9630
	1030	9812	9618
	1040	9872	9623
	1051	9874	9605
	1060	9904	9615
	1070	9832	9552
	1080	9836	9574
	1091	9821	9644
	1100	9780	9632
	1110	9789	9645
	1121	9781	9583
	1130	9837	9604
	1140	9845	9667
	1150	9865	9632
	1161	9811	9623
	1170	9816	9662
	1180	9880	9660
	1190	9849	9658
	1200	9856	9658
	1210	9819	9642
	1220	9827	9670
	1231	9773	9664
	1240	9840	9670
	1250	9811	9646
	1260	9762	9631
	1270	9801	9671
	1280	9813	9632
	1290	9855	9724
	1301	9782	9635
	1310	9837	9604
	1320	9869	9660
	1330	9849	9591
	1340	9793	9642
	1350	9835	9653
	1360	9859	9638
	1371	9866	9613
	1380	9824	9602
	1390	9814	9584
	1400	9856	9618
	1411	9837	9573
	1420	9851	9642
	1430	9849	9670
	1441	9771	9591
	1450	9859	9591
	1460	9898	9622
	1470	9829	9594
	1481	9802	9583
	1490	9842	9609
	1500	9803	9546
	1511	9830	9577
	1520	9795	9540
	1530	9778	9553
	1540	9826	9560
	1551	9836	9540
	1560	9833	9593
	1570	9915	9565
	1580	9775	9550
	1590	9766	9592
	1600	9780	9568
	1610	9791	9586
	1621	9778	9555
	1630	9804	9457
	1640	9759	9551
	1650	9738	9540
	1660	9707	9537
	1670	9805	9490
	1680	9771	9540
	1691	9765	9506
	1700	9781	9568
	1710	9754	9518
	1720	9728	9506
	1731	9694	9466
	1740	9723	9456
	1750	9708	9519
	1761	9691	9508
	1770	9795	9523
	1780	9663	9524
	1790	9650	9528
	1801	9683	9482
	1810	9718	9524
	1820	9707	9409
	1831	9669	9521
	1840	9647	9417
	1850	9694	9407
	1860	9645	9466
	1871	9618	9398
	1880	9637	9479
	1890	9663	9442
	1900	9691	9458
	1910	9705	9442
	1920	9651	9465
	1930	9662	9438
	1941	9662	9398
	1950	9635	9436
	1960	9681	9462
	1970	9643	9448
	1980	9625	9459
	1990	9611	9439
	2000	9615	9435
	2011	9643	9399
	2020	9672	9370
	2030	9617	9392
	2040	9624	9412
	2051	9591	9432
	2060	9632	9350
	2070	9627	9398
	2081	9577	9408
	2090	9619	9392
	2100	9648	9380
	2110	9643	9389
	2121	9672	9371
	2130	9614	9379
	2140	9596	9383
	2151	9564	9395
	2160	9612	9387
	2170	9586	9333
	2180	9597	9340
	2191	9580	9344
	2200	9587	9329
	2210	9564	9338
	2220	9621	9371
	2230	9578	9290
	2240	9591	9302
	2250	9623	9342
	2261	9591	9334
	2270	9577	9340
	2280	9581	9296
	2290	9669	9344
	2300	9646	9305
	2310	9591	9319
	2320	9610	9275
	2331	9631	9302
	2340	9616	9354
	2350	9589	9299
	2360	9617	9313
	2370	9643	9311
	2380	9580	9244
	2390	9561	9264
	2401	9573	9231
	2410	9598	9251
	2420	9603	9217
	2430	9546	9239
	2441	9644	9236
	2450	9548	9243
	2460	9621	9270
	2471	9583	9189
	2480	9499	9224
	2490	9558	9215
	2500	9598	9256
	2511	9529	9190
	2520	9530	9234
	2530	9566	9264
	2540	9562	9143
	2550	9543	9204
	2560	9564	9168
	2570	9558	9174
	2581	9580	9218
	2590	9498	9159
	2600	9573	9155
	2610	9541	9176
	2620	9575	9176
	2630	9564	9171
	2640	9576	9225
	2651	9576	9175
	2660	9525	9208
	2670	9498	9219
	2680	9537	9159
	2690	9547	9129
	0			1615	1053
	10			2368	1370
	20			3362	1945
	30			4318	2580
	40			5154	3314
	50			5975	4037
	60			6615	4723
	70			7109	5387
	80			7556	6006
	90			8011	6500
	100			8301	7028
	110			8647	7455
	120			8963	7837
	130			9202	8176
	140			9305	8490
	150			9373	8722
	160			9515	8954
	170			9526	9130
	180			9596	9354
	190			9591	9443
	200			9586	9551
	210			9615	9678
	220			9662	9768
	230			9598	9840
	240			9665	9870
	250			9574	9942
	260			9592	9946
	270			9642	9953
	280			9635	10047
	290			9646	10063
	300			9640	10051
	310			9636	9986
	320			9645	10036
	330			9628	10063
	340			9681	10038
	350			9628	10006
	360			9703	10065
	370			9678	9972
	380			9669	9971
	390			9677	9993
	400			9619	10038
	410			9654	9999
	420			9631	9967
	430			9634	9982
	440			9631	9966
	450			9569	9991
	460			9670	9997
	470			9600	9952
	480			9642	10004
	490			9559	10013
	500			9582	9932
	510			9599	9925
	520			9638	9983
	530			9649	9988
	540			9614	10008
	550			9624	9999
	560			9616	9947
	570			9634	9984
	580			9579	9968
	590			9591	9931
	600			9623	9992
	610			9628	9943
	620			9635	10003
	630			9617	9951
	640			9649	9961
	650			9603	9990
	660			9610	9956
	670			9614	9946
	680			9660	9973
	690			9636	9959
	700			9603	9952
	710			9609	9959
	720			9695	10033
	730			9648	9956
	740			9618	9984
	750			9585	9984
	760			9641	9975
	770			9582	9995
	780			9597	10009
	790			9640	9992
	800			9690	10002
	810			9658	10015
	820			9668	10040
	830			9704	10048
	840			9651	10077
	850			9689	10058
	860			9679	10017
	870			9702	10142
	880			9625	10071
	890			9690	10074
	900			9680	10058
	910			9658	10051
	920			9698	10025
	930			9663	10069
	940			9669	10092
	950			9656	10142
	960			9743	10105
	970			9681	10108
	980			9648	10163
	990			9727	10137
	1000			9703	10169
	1010			9676	10155
	1020			9646	10243
	1030			9657	10217
	1040			9579	10228
	1050			9677	10235
	1060			9614	10226
	1070			9656	10235
	1080			9643	10288
	1090			9669	10290
	1100			9645	10277
	1110			9680	10306
	1120			9699	10313
	1130			9707	10356
	1140			9720	10375
	1150			9779	10393
	1160			9742	10466
	1170			9794	10404
	1180			9709	10489
	1190			9781	10436
	1200			9789	10448
	1210			9724	10461
	1220			9759	10420
	1230			9693	10439
	1240			9778	10441
	1250			9815	10468
	1260			9857	10461
	1270			9864	10448
	1280			9832	10394
	1290			9784	10445
	1300			9886	10403
	1310			9836	10449
	1320			9852	10466
	1330			9872	10471
	1340			9935	10509
	1350			9916	10460
	1360			9908	10434
	1370			9866	10424
	1380			9841	10483
	1390			9882	10402
	1400			9943	10516
	1410			9877	10469
	1420			9847	10493
	1430			9878	10468
	1440			9891	10371
	1450			9917	10460
	1460			9906	10427
	1470			9899	10419
	1480			9955	10439
	1490			9920	10512
	1500			9838	10471
	1510			9872	10424
	1520			9866	10404
	1530			9873	10437
	1540			9917	10387
	1550			9895	10472
	1560			9860	10420
	1570			9844	10538
	1580			9884	10432
	1590			9903	10431
	1600			9944	10481
	1610			9913	10438
	1620			9874	10500
	1630			9890	10463
	1640			9907	10470
	1650			9886	10433
	1660			9922	10453
	1670			9934	10435
	1680			9889	10505
	1690			9879	10409
	1700			9896	10425
	1710			9865	10420
	1720			9885	10429
	1730			9907	10448
	1740			9877	10416
	1750			9818	10307
	1760			9892	10376
	1770			9899	10407
	1780			9913	10385
	1790			9814	10391
	1800			9841	10327
	1810			9846	10380
	1820			9910	10356
	1830			9867	10399
	1840			9859	10380
	1850			9828	10360
	1860			9862	10289
	1870			9888	10354
	1880			9849	10289
	1890			9828	10351
	1900			9867	10344
	1910			9883	10276
	1920			9849	10315
	1930			9861	10282
	1940			9889	10251
	1950			9838	10235
	1960			9887	10297
	1970			9901	10275
	1980			9922	10250
	1990			9834	10213
	2000			9859	10216
	2010			9910	10273
	2020			9936	10156
	2030			9876	10261
	2040			9899	10262
	2050			9881	10217
	2059			9889	10293
	2070			9897	10257
	2080			9915	10225
	2090			9870	10165
	2100			9892	10213
	2110			9847	10231
	2120			9914	10134
	2130			9818	10199
	2140			9864	10234
	2150			9800	10230
	2160			9836	10210
	2170			9784	10249
	2180			9808	10228
	2190			9841	10178
	2200			9806	10248
	2210			9822	10232
	2220			9768	10221
	2230			9840	10234
	2240			9865	10215
	2250			9816	10285
	2260			9781	10281
	2270			9866	10200
	2280			9850	10203
	2290			9798	10194
	2300			9751	10240
	2310			9786	10270
	2320			9799	10218
	2330			9804	10204
	2340			9788	10215
	2350			9779	10210
	2360			9804	10179
	2370			9809	10216
	2380			9785	10246
	2390			9818	10236
	2400			9754	10181
	2410			9788	10227
	2420			9716	10206
	2430			9784	10191
	2440			9754	10207
	2450			9860	10144
	2460			9730	10187
	2470			9740	10224
	2480			9720	10125
	2490			9757	10179
	2500			9743	10172
	2510			9761	10144
	2520			9762	10212
	2530			9786	10177
	2540			9737	10215
	2550			9724	10206
	2560			9824	10126
	2570			9724	10183
	2580			9769	10166
	2590			9761	10170
	2600			9703	10144
	2610			9720	10165
	2620			9736	10180
	2630			9747	10174
	2640			9733	10186
	2650			9753	10177
	2659			9778	10147
	2670			9723	10148
	2680			9735	10134
	2690			9738	10110
	0					915	773
	10					1078	796
	21					1353	860
	31					1714	929
	40					2151	1022
	50					2609	1127
	61					3161	1270
	70					3685	1430
	80					4128	1611
	91					4657	1854
	101					5091	2067
	110					5556	2280
	120					5930	2522
	131					6403	2807
	140					6698	3016
	150					7024	3239
	161					7408	3562
	171					7664	3823
	180					7901	4103
	190					8138	4325
	201					8426	4602
	211					8569	4894
	220					8740	5073
	230					8942	5329
	241					9023	5592
	250					9202	5774
	260					9335	6020
	271					9426	6251
	281					9499	6418
	290					9647	6634
	300					9736	6781
	311					9730	7008
	320					9851	7162
	330					9920	7332
	341					9959	7448
	351					9992	7633
	360					10053	7710
	370					10020	7857
	381					10066	8023
	390					10108	8166
	400					10117	8265
	411					10165	8378
	421					10139	8461
	430					10128	8580
	440					10199	8646
	451					10160	8751
	460					10168	8825
	470					10217	8975
	481					10179	9012
	491					10224	9077
	500					10222	9225
	510					10187	9240
	521					10183	9296
	531					10209	9436
	540					10224	9493
	550					10188	9541
	561					10269	9587
	570					10272	9610
	580					10270	9667
	591					10249	9766
	601					10279	9733
	610					10217	9806
	620					10229	9859
	631					10255	9936
	640					10211	9928
	650					10217	9968
	661					10241	10047
	671					10227	10015
	680					10272	10039
	690					10252	10112
	701					10290	10191
	710					10249	10165
	720					10230	10193
	731					10294	10183
	741					10291	10233
	750					10343	10278
	760					10205	10332
	771					10229	10272
	780					10267	10331
	790					10239	10367
	801					10243	10341
	811					10167	10324
	820					10151	10395
	830					10263	10404
	841					10182	10414
	851					10240	10420
	860					10245	10464
	870					10206	10425
	881					10206	10432
	890					10243	10410
	900					10222	10462
	911					10205	10397
	921					10176	10547
	930					10257	10444
	940					10220	10399
	951					10246	10513
	960					10235	10436
	970					10285	10423
	981					10286	10447
	991					10233	10467
	1000					10325	10474
	1010					10329	10430
	1021					10286	10537
	1030					10291	10447
	1040					10269	10455
	1051					10375	10479
	1061					10301	10477
	1070					10332	10513
	1080					10295	10462
	1091					10280	10489
	1100					10336	10520
	1110					10378	10457
	1121					10352	10468
	1131					10347	10457
	1140					10332	10573
	1150					10292	10521
	1161					10363	10510
	1170					10296	10518
	1180					10373	10482
	1190					10383	10484
	1201					10323	10480
	1210					10389	10518
	1220					10417	10495
	1231					10411	10490
	1241					10331	10495
	1250					10368	10485
	1260					10383	10452
	1271					10397	10489
	1280					10374	10460
	1290					10367	10504
	1301					10387	10483
	1311					10429	10479
	1320					10458	10461
	1330					10386	10449
	1341					10445	10429
	1350					10415	10439
	1360					10407	10421
	1371					10376	10428
	1381					10367	10415
	1390					10377	10439
	1400					10378	10430
	1411					10470	10484
	1420					10450	10386
	1430					10391	10409
	1441					10385	10467
	1451					10356	10439
	1460					10422	10391
	1470					10420	10428
	1481					10445	10438
	1490					10383	10404
	1500					10386	10426
	1511					10406	10403
	1521					10410	10408
	1530					10386	10441
	1540					10361	10416
	1551					10407	10346
	1561					10404	10366
	1570					10392	10353
	1580					10337	10374
	1591					10410	10417
	1600					10360	10283
	1610					10299	10335
	1621					10374	10318
	1631					10363	10343
	1640					10401	10340
	1650					10383	10318
	1661					10387	10367
	1670					10381	10348
	1680					10308	10361
	1691					10282	10290
	1701					10337	10329
	1710					10267	10322
	1720					10292	10340
	1731					10298	10280
	1740					10290	10312
	1750					10264	10286
	1761					10291	10343
	1771					10304	10352
	1780					10273	10254
	1790					10290	10323
	1801					10277	10280
	1810					10325	10305
	1820					10188	10237
	1831					10289	10253
	1841					10268	10283
	1850					10201	10287
	1860					10294	10276
	1871					10302	10328
	1881					10264	10232
	1890					10212	10194
	1900					10254	10245
	1911					10251	10247
	1920					10218	10240
	1930					10293	10194
	1941					10259	10231
	1951					10279	10249
	1960					10281	10223
	1970					10220	10220
	1981					10228	10148
	1990					10216	10213
	2000					10211	10172
	2011					10233	10153
	2021					10226	10201
	2030					10260	10168
	2040					10206	10134
	2051					10239	10147
	2060					10266	10215
	2070					10191	10160
	2081					10182	10180
	2091					10163	10122
	2100					10203	10145
	2110					10232	10172
	2121					10242	10127
	2130					10179	10205
	2140					10175	10085
	2151					10197	10125
	2161					10292	10161
	2170					10218	10140
	2180					10209	10129
	2191					10191	10128
	2201					10237	10063
	2210					10212	10121
	2220					10291	10091
	2231					10215	10146
	2240					10190	10139
	2250					10134	10097
	2261					10178	10073
	2271					10177	10059
	2280					10243	10103
	2290					10194	10051
	2301					10197	10108
	2310					10155	10058
	2320					10164	10031
	2331					10152	10040
	2341					10138	10049
	2350					10209	10042
	2360					10122	10029
	2371					10149	10018
	2380					10169	9999
	2390					10150	10019
	2401					10099	10061
	2411					10164	10068
	2420					10121	10068
	2430					10177	9964
	2441					10145	10008
	2450					10169	10057
	2460					10175	9979
	2471					10165	10020
	2481					10149	9959
	2490					10135	9942
	2500					10086	10007
	2511					10188	9975
	2520					10116	9931
	2529					10174	9971
	2540					10084	10004
	2551					10133	9954
	2560					10181	9954
	2570					10148	9940
	2581					10120	9931
	2591					10076	9913
	2600					10059	9967
	2610					10111	9921
	2621					10110	9933
	2630					10073	9953
	2640					10092	9907
	2651					10078	9831
	2661					10137	9852
	2670					10097	9897
	2680					10054	9927
	2691					10107	9856

## Sheet: Panel F
	Maximum Polymerization Rates
	[Dip1] (µM)	Dip1 and Wsp1-VCA	Dip1 and Wsp1-CA	Dip1 Alone
	0	4.32	2.91	2.82
	0.05	8.24	3.39	3.05
	0.1	10.64	3.67	3.26
	0.25	15.11	5.11	4.12
	0.5	19.84	6.74	5.38
	1	21.47	8.11	7.49
	5	27.59	12.36	12.98
	10	31.39	15.26	16.31
	20	31.91	18.07	19.07
	30	35.59	18.99	20.32
	40	33.29	19.42	21.01
