# Supplementary material for: Synergy between Wsp1 and Dip1 may initiate assembly of endocytic actin networks
Source: eLife. 2020 Nov 12;9:e60419. doi: 10.7554/eLife.60419 (PMC7707826; doi:10.7554/eLife.60419)
Supplement: Figure 4—source data 1. [file elife-60419-fig4-data1.xlsx]

## Sheet: Panel B
	Time	Actin Exp.	Actin Fit	0.5uM Dip1 Exp.	0.5uM Dip1 Fit	1uM Dip1 Exp.	1uM Dip1 Fit	5uM Dip1 Exp.	5uM Dip1 Fit	10uM Dip1 Exp.	10uM Dip1 Fit
	32.33	8.21e-09
	42.33	2.46e-08
	52.33	3.19e-08
	62.33	4.99e-08
	72.33	7.95e-08
	82.33	9.07e-08
	92.33	1.1e-07
	102.33	1.37e-07
	112.33	1.6e-07
	122.33	1.76e-07
	132.33	1.93e-07
	142.33	2.19e-07
	152.33	2.38e-07
	162.33	2.55e-07
	172.33	2.85e-07
	182.33	3.09e-07
	192.33	3.34e-07
	202.33	3.61e-07
	212.33	3.86e-07
	222.33	4.1e-07
	232.33	4.35e-07
	242.33	4.69e-07
	252.33	4.95e-07
	262.33	5.3e-07
	272.33	5.51e-07
	282.33	5.88e-07
	292.33	6.19e-07
	302.33	6.48e-07
	312.33	6.72e-07
	322.33	7.05e-07
	332.33	7.4e-07
	342.33	7.68e-07
	352.33	7.93e-07
	362.33	8.39e-07
	32.33		7.56e-09
	34.83		8.77e-09
	37.33		1.01e-08
	39.83		1.15e-08
	42.33		1.29e-08
	44.83		1.45e-08
	47.33		1.62e-08
	49.83		1.79e-08
	52.33		1.97e-08
	54.83		2.16e-08
	57.33		2.36e-08
	59.83		2.57e-08
	62.33		2.79e-08
	64.83		3.02e-08
	67.33		3.25e-08
	69.83		3.49e-08
	72.33		3.75e-08
	74.83		4.01e-08
	77.33		4.27e-08
	79.83		4.55e-08
	82.33		4.84e-08
	84.83		5.13e-08
	87.33		5.43e-08
	89.83		5.74e-08
	92.33		6.06e-08
	94.83		6.38e-08
	97.33		6.72e-08
	99.83		7.06e-08
	102.33		7.41e-08
	104.83		7.76e-08
	107.33		8.13e-08
	109.83		8.5e-08
	112.33		8.88e-08
	114.83		9.27e-08
	117.33		9.66e-08
	119.83		1.01e-07
	122.33		1.05e-07
	124.83		1.09e-07
	127.33		1.13e-07
	129.83		1.17e-07
	132.33		1.22e-07
	134.83		1.26e-07
	137.33		1.31e-07
	139.83		1.35e-07
	142.33		1.4e-07
	144.83		1.45e-07
	147.33		1.5e-07
	149.83		1.54e-07
	152.33		1.59e-07
	154.83		1.64e-07
	157.33		1.69e-07
	159.83		1.75e-07
	162.33		1.8e-07
	164.83		1.85e-07
	167.33		1.9e-07
	169.83		1.96e-07
	172.33		2.01e-07
	174.83		2.07e-07
	177.33		2.12e-07
	179.83		2.18e-07
	182.33		2.23e-07
	184.83		2.29e-07
	187.33		2.35e-07
	189.83		2.41e-07
	192.33		2.47e-07
	194.83		2.52e-07
	197.33		2.58e-07
	199.83		2.64e-07
	202.33		2.71e-07
	204.83		2.77e-07
	207.33		2.83e-07
	209.83		2.89e-07
	212.33		2.95e-07
	214.83		3.02e-07
	217.33		3.08e-07
	219.83		3.14e-07
	222.33		3.21e-07
	224.83		3.27e-07
	227.33		3.34e-07
	229.83		3.4e-07
	232.33		3.47e-07
	234.83		3.54e-07
	237.33		3.6e-07
	239.83		3.67e-07
	242.33		3.74e-07
	244.83		3.81e-07
	247.33		3.88e-07
	249.83		3.94e-07
	252.33		4.01e-07
	254.83		4.08e-07
	257.33		4.15e-07
	259.83		4.22e-07
	262.33		4.29e-07
	264.83		4.36e-07
	267.33		4.43e-07
	269.83		4.51e-07
	272.33		4.58e-07
	274.83		4.65e-07
	277.33		4.72e-07
	279.83		4.79e-07
	282.33		4.87e-07
	284.83		4.94e-07
	287.33		5.01e-07
	289.83		5.08e-07
	292.33		5.16e-07
	294.83		5.23e-07
	297.33		5.31e-07
	299.83		5.38e-07
	302.33		5.45e-07
	304.83		5.53e-07
	307.33		5.6e-07
	309.83		5.68e-07
	312.33		5.75e-07
	314.83		5.83e-07
	317.33		5.9e-07
	319.83		5.98e-07
	322.33		6.06e-07
	324.83		6.13e-07
	327.33		6.21e-07
	329.83		6.28e-07
	332.33		6.36e-07
	334.83		6.44e-07
	337.33		6.51e-07
	339.83		6.59e-07
	342.33		6.67e-07
	344.83		6.74e-07
	347.33		6.82e-07
	349.83		6.9e-07
	352.33		6.97e-07
	354.83		7.05e-07
	357.33		7.13e-07
	359.83		7.2e-07
	362.33		7.28e-07
	29			7.7886e-08
	39			1.8451e-07
	49			3.3781e-07
	59			5.1275e-07
	69			7.2106e-07
	79			9.3926e-07
	89			1.1352e-06
	99			1.3253e-06
	109			1.4978e-06
	119			1.6498e-06
	129			1.8047e-06
	139			1.9314e-06
	149			2.0544e-06
	159			2.1524e-06
	169			2.2704e-06
	179			2.3403e-06
	189			2.4355e-06
	199			2.4902e-06
	209			2.5446e-06
	219			2.6092e-06
	229			2.6515e-06
	239			2.6917e-06
	249			2.7226e-06
	259			2.7618e-06
	269			2.7776e-06
	279			2.7996e-06
	289			2.8125e-06
	299			2.8286e-06
	309			2.8546e-06
	319			2.8505e-06
	329			2.8629e-06
	339			2.8552e-06
	349			2.8586e-06
	359			2.8539e-06
	29				9.73e-08
	31.5				1.14e-07
	34				1.33e-07
	36.5				1.52e-07
	39				1.73e-07
	41.5				1.94e-07
	44				2.17e-07
	46.5				2.41e-07
	49				2.66e-07
	51.5				2.92e-07
	54				3.19e-07
	56.5				3.46e-07
	59				3.74e-07
	61.5				4.04e-07
	64				4.33e-07
	66.5				4.64e-07
	69				4.95e-07
	71.5				5.27e-07
	74				5.59e-07
	76.5				5.91e-07
	79				6.24e-07
	81.5				6.58e-07
	84				6.92e-07
	86.5				7.26e-07
	89				7.6e-07
	91.5				7.95e-07
	94				8.29e-07
	96.5				8.64e-07
	99				8.99e-07
	101.5				9.34e-07
	104				9.69e-07
	106.5				1e-06
	109				1.04e-06
	111.5				1.07e-06
	114				1.11e-06
	116.5				1.14e-06
	119				1.18e-06
	121.5				1.21e-06
	124				1.24e-06
	126.5				1.28e-06
	129				1.31e-06
	131.5				1.34e-06
	134				1.38e-06
	136.5				1.41e-06
	139				1.44e-06
	141.5				1.47e-06
	144				1.51e-06
	146.5				1.54e-06
	149				1.57e-06
	151.5				1.6e-06
	154				1.63e-06
	156.5				1.66e-06
	159				1.68e-06
	161.5				1.71e-06
	164				1.74e-06
	166.5				1.77e-06
	169				1.8e-06
	171.5				1.82e-06
	174				1.85e-06
	176.5				1.87e-06
	179				1.9e-06
	181.5				1.92e-06
	184				1.95e-06
	186.5				1.97e-06
	189				1.99e-06
	191.5				2.02e-06
	194				2.04e-06
	196.5				2.06e-06
	199				2.08e-06
	201.5				2.1e-06
	204				2.12e-06
	206.5				2.14e-06
	209				2.16e-06
	211.5				2.18e-06
	214				2.2e-06
	216.5				2.22e-06
	219				2.24e-06
	221.5				2.26e-06
	224				2.27e-06
	226.5				2.29e-06
	229				2.31e-06
	231.5				2.32e-06
	234				2.34e-06
	236.5				2.35e-06
	239				2.37e-06
	241.5				2.38e-06
	244				2.39e-06
	246.5				2.41e-06
	249				2.42e-06
	251.5				2.43e-06
	254				2.45e-06
	256.5				2.46e-06
	259				2.47e-06
	261.5				2.48e-06
	264				2.49e-06
	266.5				2.51e-06
	269				2.52e-06
	271.5				2.53e-06
	274				2.54e-06
	276.5				2.55e-06
	279				2.56e-06
	281.5				2.57e-06
	284				2.57e-06
	286.5				2.58e-06
	289				2.59e-06
	291.5				2.6e-06
	294				2.61e-06
	296.5				2.62e-06
	299				2.62e-06
	301.5				2.63e-06
	304				2.64e-06
	306.5				2.65e-06
	309				2.65e-06
	311.5				2.66e-06
	314				2.67e-06
	316.5				2.67e-06
	319				2.68e-06
	321.5				2.69e-06
	324				2.69e-06
	326.5				2.7e-06
	329				2.7e-06
	331.5				2.71e-06
	334				2.71e-06
	336.5				2.72e-06
	339				2.72e-06
	341.5				2.73e-06
	344				2.73e-06
	346.5				2.74e-06
	349				2.74e-06
	351.5				2.74e-06
	354				2.75e-06
	356.5				2.75e-06
	359				2.76e-06
	28.33					1.02e-07
	38.33					2.87e-07
	48.33					4.91e-07
	58.33					7.28e-07
	68.33					9.6e-07
	78.33					1.18e-06
	88.33					1.39e-06
	98.33					1.59e-06
	108.33					1.75e-06
	118.33					1.92e-06
	128.33					2.06e-06
	138.33					2.18e-06
	148.33					2.29e-06
	158.33					2.39e-06
	168.33					2.47e-06
	178.33					2.54e-06
	188.33					2.6e-06
	198.33					2.67e-06
	208.33					2.7e-06
	218.33					2.73e-06
	228.33					2.78e-06
	238.33					2.8e-06
	248.33					2.83e-06
	258.33					2.84e-06
	268.33					2.86e-06
	278.33					2.86e-06
	288.33					2.86e-06
	298.33					2.89e-06
	308.33					2.9e-06
	318.33					2.9e-06
	328.33					2.87e-06
	338.33					2.89e-06
	348.33					2.9e-06
	358.33					2.89e-06
	28.33						1.68e-07
	30.83						1.98e-07
	33.33						2.29e-07
	35.83						2.63e-07
	38.33						2.98e-07
	40.83						3.34e-07
	43.33						3.72e-07
	45.83						4.12e-07
	48.33						4.53e-07
	50.83						4.95e-07
	53.33						5.38e-07
	55.83						5.82e-07
	58.33						6.27e-07
	60.83						6.72e-07
	63.33						7.18e-07
	65.83						7.65e-07
	68.33						8.11e-07
	70.83						8.59e-07
	73.33						9.06e-07
	75.83						9.53e-07
	78.33						1e-06
	80.83						1.05e-06
	83.33						1.09e-06
	85.83						1.14e-06
	88.33						1.19e-06
	90.83						1.23e-06
	93.33						1.28e-06
	95.83						1.32e-06
	98.33						1.37e-06
	100.83						1.41e-06
	103.33						1.46e-06
	105.83						1.5e-06
	108.33						1.54e-06
	110.83						1.58e-06
	113.33						1.62e-06
	115.83						1.66e-06
	118.33						1.7e-06
	120.83						1.74e-06
	123.33						1.78e-06
	125.83						1.81e-06
	128.33						1.85e-06
	130.83						1.88e-06
	133.33						1.92e-06
	135.83						1.95e-06
	138.33						1.98e-06
	140.83						2.01e-06
	143.33						2.04e-06
	145.83						2.07e-06
	148.33						2.1e-06
	150.83						2.13e-06
	153.33						2.15e-06
	155.83						2.18e-06
	158.33						2.21e-06
	160.83						2.23e-06
	163.33						2.25e-06
	165.83						2.28e-06
	168.33						2.3e-06
	170.83						2.32e-06
	173.33						2.34e-06
	175.83						2.36e-06
	178.33						2.38e-06
	180.83						2.4e-06
	183.33						2.42e-06
	185.83						2.44e-06
	188.33						2.45e-06
	190.83						2.47e-06
	193.33						2.49e-06
	195.83						2.5e-06
	198.33						2.52e-06
	200.83						2.53e-06
	203.33						2.54e-06
	205.83						2.56e-06
	208.33						2.57e-06
	210.83						2.58e-06
	213.33						2.59e-06
	215.83						2.6e-06
	218.33						2.62e-06
	220.83						2.63e-06
	223.33						2.64e-06
	225.83						2.65e-06
	228.33						2.65e-06
	230.83						2.66e-06
	233.33						2.67e-06
	235.83						2.68e-06
	238.33						2.69e-06
	240.83						2.7e-06
	243.33						2.7e-06
	245.83						2.71e-06
	248.33						2.72e-06
	250.83						2.72e-06
	253.33						2.73e-06
	255.83						2.74e-06
	258.33						2.74e-06
	260.83						2.75e-06
	263.33						2.75e-06
	265.83						2.76e-06
	268.33						2.76e-06
	270.83						2.77e-06
	273.33						2.77e-06
	275.83						2.78e-06
	278.33						2.78e-06
	280.83						2.79e-06
	283.33						2.79e-06
	285.83						2.79e-06
	288.33						2.8e-06
	290.83						2.8e-06
	293.33						2.8e-06
	295.83						2.81e-06
	298.33						2.81e-06
	300.83						2.81e-06
	303.33						2.81e-06
	305.83						2.82e-06
	308.33						2.82e-06
	310.83						2.82e-06
	313.33						2.82e-06
	315.83						2.83e-06
	318.33						2.83e-06
	320.83						2.83e-06
	323.33						2.83e-06
	325.83						2.84e-06
	328.33						2.84e-06
	330.83						2.84e-06
	333.33						2.84e-06
	335.83						2.84e-06
	338.33						2.84e-06
	340.83						2.84e-06
	343.33						2.85e-06
	345.83						2.85e-06
	348.33						2.85e-06
	350.83						2.85e-06
	353.33						2.85e-06
	355.83						2.85e-06
	358.33						2.85e-06
	27.67							2.48e-07
	37.67							5.32e-07
	47.67							8.17e-07
	57.67							1.1e-06
	67.67							1.38e-06
	77.67							1.63e-06
	87.67							1.83e-06
	97.67							2.03e-06
	107.67							2.18e-06
	117.67							2.32e-06
	127.67							2.46e-06
	137.67							2.53e-06
	147.67							2.63e-06
	157.67							2.69e-06
	167.67							2.75e-06
	177.67							2.79e-06
	187.67							2.81e-06
	197.67							2.84e-06
	207.67							2.88e-06
	217.67							2.87e-06
	227.67							2.89e-06
	237.67							2.87e-06
	247.67							2.89e-06
	257.67							2.89e-06
	267.67							2.88e-06
	277.67							2.88e-06
	287.67							2.88e-06
	297.67							2.89e-06
	307.67							2.88e-06
	317.67							2.88e-06
	327.67							2.88e-06
	337.67							2.87e-06
	347.67							2.88e-06
	357.67							2.9e-06
	27.67								5.1e-07
	30.17								5.91e-07
	32.67								6.75e-07
	35.17								7.61e-07
	37.67								8.47e-07
	40.17								9.34e-07
	42.67								1.02e-06
	45.17								1.11e-06
	47.67								1.19e-06
	50.17								1.28e-06
	52.67								1.36e-06
	55.17								1.44e-06
	57.67								1.52e-06
	60.17								1.59e-06
	62.67								1.67e-06
	65.17								1.74e-06
	67.67								1.81e-06
	70.17								1.87e-06
	72.67								1.93e-06
	75.17								1.99e-06
	77.67								2.05e-06
	80.17								2.1e-06
	82.67								2.15e-06
	85.17								2.2e-06
	87.67								2.24e-06
	90.17								2.28e-06
	92.67								2.32e-06
	95.17								2.36e-06
	97.67								2.39e-06
	100.17								2.43e-06
	102.67								2.46e-06
	105.17								2.49e-06
	107.67								2.51e-06
	110.17								2.54e-06
	112.67								2.56e-06
	115.17								2.59e-06
	117.67								2.61e-06
	120.17								2.63e-06
	122.67								2.64e-06
	125.17								2.66e-06
	127.67								2.68e-06
	130.17								2.69e-06
	132.67								2.7e-06
	135.17								2.72e-06
	137.67								2.73e-06
	140.17								2.74e-06
	142.67								2.75e-06
	145.17								2.76e-06
	147.67								2.77e-06
	150.17								2.78e-06
	152.67								2.78e-06
	155.17								2.79e-06
	157.67								2.8e-06
	160.17								2.8e-06
	162.67								2.81e-06
	165.17								2.81e-06
	167.67								2.82e-06
	170.17								2.82e-06
	172.67								2.83e-06
	175.17								2.83e-06
	177.67								2.83e-06
	180.17								2.84e-06
	182.67								2.84e-06
	185.17								2.84e-06
	187.67								2.85e-06
	190.17								2.85e-06
	192.67								2.85e-06
	195.17								2.85e-06
	197.67								2.85e-06
	200.17								2.86e-06
	202.67								2.86e-06
	205.17								2.86e-06
	207.67								2.86e-06
	210.17								2.86e-06
	212.67								2.86e-06
	215.17								2.86e-06
	217.67								2.86e-06
	220.17								2.87e-06
	222.67								2.87e-06
	225.17								2.87e-06
	227.67								2.87e-06
	230.17								2.87e-06
	232.67								2.87e-06
	235.17								2.87e-06
	237.67								2.87e-06
	240.17								2.87e-06
	242.67								2.87e-06
	245.17								2.87e-06
	247.67								2.87e-06
	250.17								2.87e-06
	252.67								2.87e-06
	255.17								2.87e-06
	257.67								2.87e-06
	260.17								2.87e-06
	262.67								2.87e-06
	265.17								2.87e-06
	267.67								2.87e-06
	270.17								2.87e-06
	272.67								2.87e-06
	275.17								2.87e-06
	277.67								2.87e-06
	280.17								2.87e-06
	282.67								2.88e-06
	285.17								2.88e-06
	287.67								2.88e-06
	290.17								2.88e-06
	292.67								2.88e-06
	295.17								2.88e-06
	297.67								2.88e-06
	300.17								2.88e-06
	302.67								2.88e-06
	305.17								2.88e-06
	307.67								2.88e-06
	310.17								2.88e-06
	312.67								2.88e-06
	315.17								2.88e-06
	317.67								2.88e-06
	320.17								2.88e-06
	322.67								2.88e-06
	325.17								2.88e-06
	327.67								2.88e-06
	330.17								2.88e-06
	332.67								2.88e-06
	335.17								2.88e-06
	337.67								2.88e-06
	340.17								2.88e-06
	342.67								2.88e-06
	345.17								2.88e-06
	347.67								2.88e-06
	350.17								2.88e-06
	352.67								2.88e-06
	355.17								2.88e-06
	357.67								2.88e-06
	27									2.71e-07
	37									6.29e-07
	47									9.74e-07
	57									1.27e-06
	67									1.57e-06
	77									1.8e-06
	87									1.98e-06
	97									2.14e-06
	107									2.3e-06
	117									2.41e-06
	127									2.53e-06
	137									2.65e-06
	147									2.73e-06
	157									2.77e-06
	167									2.79e-06
	177									2.85e-06
	187									2.85e-06
	197									2.88e-06
	207									2.87e-06
	217									2.87e-06
	227									2.88e-06
	237									2.9e-06
	247									2.88e-06
	257									2.9e-06
	267									2.87e-06
	277									2.87e-06
	287									2.89e-06
	297									2.89e-06
	307									2.89e-06
	317									2.89e-06
	327									2.89e-06
	337									2.89e-06
	347									2.89e-06
	27										6.8e-07
	29.5										7.83e-07
	32										8.88e-07
	34.5										9.93e-07
	37										1.1e-06
	39.5										1.2e-06
	42										1.3e-06
	44.5										1.4e-06
	47										1.5e-06
	49.5										1.59e-06
	52										1.67e-06
	54.5										1.76e-06
	57										1.84e-06
	59.5										1.91e-06
	62										1.98e-06
	64.5										2.05e-06
	67										2.11e-06
	69.5										2.17e-06
	72										2.23e-06
	74.5										2.28e-06
	77										2.33e-06
	79.5										2.37e-06
	82										2.41e-06
	84.5										2.45e-06
	87										2.48e-06
	89.5										2.52e-06
	92										2.55e-06
	94.5										2.57e-06
	97										2.6e-06
	99.5										2.62e-06
	102										2.64e-06
	104.5										2.66e-06
	107										2.68e-06
	109.5										2.7e-06
	112										2.71e-06
	114.5										2.73e-06
	117										2.74e-06
	119.5										2.75e-06
	122										2.76e-06
	124.5										2.77e-06
	127										2.78e-06
	129.5										2.79e-06
	132										2.8e-06
	134.5										2.81e-06
	137										2.81e-06
	139.5										2.82e-06
	142										2.82e-06
	144.5										2.83e-06
	147										2.83e-06
	149.5										2.84e-06
	152										2.84e-06
	154.5										2.84e-06
	157										2.85e-06
	159.5										2.85e-06
	162										2.85e-06
	164.5										2.85e-06
	167										2.86e-06
	169.5										2.86e-06
	172										2.86e-06
	174.5										2.86e-06
	177										2.86e-06
	179.5										2.86e-06
	182										2.86e-06
	184.5										2.87e-06
	187										2.87e-06
	189.5										2.87e-06
	192										2.87e-06
	194.5										2.87e-06
	197										2.87e-06
	199.5										2.87e-06
	202										2.87e-06
	204.5										2.87e-06
	207										2.87e-06
	209.5										2.87e-06
	212										2.87e-06
	214.5										2.87e-06
	217										2.87e-06
	219.5										2.87e-06
	222										2.87e-06
	224.5										2.87e-06
	227										2.87e-06
	229.5										2.87e-06
	232										2.87e-06
	234.5										2.87e-06
	237										2.87e-06
	239.5										2.87e-06
	242										2.87e-06
	244.5										2.87e-06
	247										2.87e-06
	249.5										2.88e-06
	252										2.88e-06
	254.5										2.88e-06
	257										2.88e-06
	259.5										2.88e-06
	262										2.88e-06
	264.5										2.88e-06
	267										2.88e-06
	269.5										2.88e-06
	272										2.88e-06
	274.5										2.88e-06
	277										2.88e-06
	279.5										2.88e-06
	282										2.88e-06
	284.5										2.88e-06
	287										2.88e-06
	289.5										2.88e-06
	292										2.88e-06
	294.5										2.88e-06
	297										2.88e-06
	299.5										2.88e-06
	302										2.88e-06
	304.5										2.88e-06
	307										2.88e-06
	309.5										2.88e-06
	312										2.88e-06
	314.5										2.88e-06
	317										2.88e-06
	319.5										2.88e-06
	322										2.88e-06
	324.5										2.88e-06
	327										2.88e-06
	329.5										2.88e-06
	332										2.88e-06
	334.5										2.88e-06
	337										2.88e-06
	339.5										2.88e-06
	342										2.88e-06
	344.5										2.88e-06
	347										2.88e-06

## Sheet: Panel D
	Time	Actin Exp.	Actin Fit	0.5uM Dip1 Exp.	0.5uM Dip1 Fit	1uM Dip1 Exp.	1uM Dip1 Fit	5uM Dip1 Exp.	5uM Dip1 Fit	10uM Dip1 Exp.	10uM Dip1 Fit
	32.33	8.21e-09
	42.33	2.46e-08
	52.33	3.19e-08
	62.33	4.99e-08
	72.33	7.95e-08
	82.33	9.07e-08
	92.33	1.1e-07
	102.33	1.37e-07
	112.33	1.6e-07
	122.33	1.76e-07
	132.33	1.93e-07
	142.33	2.19e-07
	152.33	2.38e-07
	162.33	2.55e-07
	172.33	2.85e-07
	182.33	3.09e-07
	192.33	3.34e-07
	202.33	3.61e-07
	212.33	3.86e-07
	222.33	4.1e-07
	232.33	4.35e-07
	242.33	4.69e-07
	252.33	4.95e-07
	262.33	5.3e-07
	272.33	5.51e-07
	282.33	5.88e-07
	292.33	6.19e-07
	302.33	6.48e-07
	312.33	6.72e-07
	322.33	7.05e-07
	332.33	7.4e-07
	342.33	7.68e-07
	352.33	7.93e-07
	362.33	8.39e-07
	32.33		7.56e-09
	34.83		8.77e-09
	37.33		1.01e-08
	39.83		1.15e-08
	42.33		1.29e-08
	44.83		1.45e-08
	47.33		1.62e-08
	49.83		1.79e-08
	52.33		1.97e-08
	54.83		2.16e-08
	57.33		2.36e-08
	59.83		2.57e-08
	62.33		2.79e-08
	64.83		3.02e-08
	67.33		3.25e-08
	69.83		3.49e-08
	72.33		3.75e-08
	74.83		4.01e-08
	77.33		4.27e-08
	79.83		4.55e-08
	82.33		4.84e-08
	84.83		5.13e-08
	87.33		5.43e-08
	89.83		5.74e-08
	92.33		6.06e-08
	94.83		6.38e-08
	97.33		6.72e-08
	99.83		7.06e-08
	102.33		7.41e-08
	104.83		7.76e-08
	107.33		8.13e-08
	109.83		8.5e-08
	112.33		8.88e-08
	114.83		9.27e-08
	117.33		9.66e-08
	119.83		1.01e-07
	122.33		1.05e-07
	124.83		1.09e-07
	127.33		1.13e-07
	129.83		1.17e-07
	132.33		1.22e-07
	134.83		1.26e-07
	137.33		1.31e-07
	139.83		1.35e-07
	142.33		1.4e-07
	144.83		1.45e-07
	147.33		1.5e-07
	149.83		1.54e-07
	152.33		1.59e-07
	154.83		1.64e-07
	157.33		1.69e-07
	159.83		1.75e-07
	162.33		1.8e-07
	164.83		1.85e-07
	167.33		1.9e-07
	169.83		1.96e-07
	172.33		2.01e-07
	174.83		2.07e-07
	177.33		2.12e-07
	179.83		2.18e-07
	182.33		2.23e-07
	184.83		2.29e-07
	187.33		2.35e-07
	189.83		2.41e-07
	192.33		2.47e-07
	194.83		2.52e-07
	197.33		2.58e-07
	199.83		2.64e-07
	202.33		2.71e-07
	204.83		2.77e-07
	207.33		2.83e-07
	209.83		2.89e-07
	212.33		2.95e-07
	214.83		3.02e-07
	217.33		3.08e-07
	219.83		3.14e-07
	222.33		3.21e-07
	224.83		3.27e-07
	227.33		3.34e-07
	229.83		3.4e-07
	232.33		3.47e-07
	234.83		3.54e-07
	237.33		3.6e-07
	239.83		3.67e-07
	242.33		3.74e-07
	244.83		3.81e-07
	247.33		3.88e-07
	249.83		3.94e-07
	252.33		4.01e-07
	254.83		4.08e-07
	257.33		4.15e-07
	259.83		4.22e-07
	262.33		4.29e-07
	264.83		4.36e-07
	267.33		4.43e-07
	269.83		4.51e-07
	272.33		4.58e-07
	274.83		4.65e-07
	277.33		4.72e-07
	279.83		4.79e-07
	282.33		4.87e-07
	284.83		4.94e-07
	287.33		5.01e-07
	289.83		5.08e-07
	292.33		5.16e-07
	294.83		5.23e-07
	297.33		5.31e-07
	299.83		5.38e-07
	302.33		5.45e-07
	304.83		5.53e-07
	307.33		5.6e-07
	309.83		5.68e-07
	312.33		5.75e-07
	314.83		5.83e-07
	317.33		5.9e-07
	319.83		5.98e-07
	322.33		6.06e-07
	324.83		6.13e-07
	327.33		6.21e-07
	329.83		6.28e-07
	332.33		6.36e-07
	334.83		6.44e-07
	337.33		6.51e-07
	339.83		6.59e-07
	342.33		6.67e-07
	344.83		6.74e-07
	347.33		6.82e-07
	349.83		6.9e-07
	352.33		6.97e-07
	354.83		7.05e-07
	357.33		7.13e-07
	359.83		7.2e-07
	362.33		7.28e-07
	29			7.79e-08
	39			1.85e-07
	49			3.38e-07
	59			5.13e-07
	69			7.21e-07
	79			9.39e-07
	89			1.14e-06
	99			1.33e-06
	109			1.5e-06
	119			1.65e-06
	129			1.8e-06
	139			1.93e-06
	149			2.05e-06
	159			2.15e-06
	169			2.27e-06
	179			2.34e-06
	189			2.44e-06
	199			2.49e-06
	209			2.54e-06
	219			2.61e-06
	229			2.65e-06
	239			2.69e-06
	249			2.72e-06
	259			2.76e-06
	269			2.78e-06
	279			2.8e-06
	289			2.81e-06
	299			2.83e-06
	309			2.85e-06
	319			2.85e-06
	329			2.86e-06
	339			2.86e-06
	349			2.86e-06
	359			2.85e-06
	29				1.5e-07
	31.5				1.76e-07
	34				2.04e-07
	36.5				2.34e-07
	39				2.66e-07
	41.5				2.99e-07
	44				3.34e-07
	46.5				3.7e-07
	49				4.07e-07
	51.5				4.45e-07
	54				4.85e-07
	56.5				5.25e-07
	59				5.67e-07
	61.5				6.09e-07
	64				6.52e-07
	66.5				6.95e-07
	69				7.39e-07
	71.5				7.84e-07
	74				8.28e-07
	76.5				8.73e-07
	79				9.18e-07
	81.5				9.64e-07
	84				1.01e-06
	86.5				1.05e-06
	89				1.1e-06
	91.5				1.14e-06
	94				1.19e-06
	96.5				1.23e-06
	99				1.28e-06
	101.5				1.32e-06
	104				1.36e-06
	106.5				1.4e-06
	109				1.45e-06
	111.5				1.49e-06
	114				1.53e-06
	116.5				1.57e-06
	119				1.61e-06
	121.5				1.65e-06
	124				1.68e-06
	126.5				1.72e-06
	129				1.76e-06
	131.5				1.79e-06
	134				1.83e-06
	136.5				1.86e-06
	139				1.9e-06
	141.5				1.93e-06
	144				1.96e-06
	146.5				1.99e-06
	149				2.02e-06
	151.5				2.05e-06
	154				2.08e-06
	156.5				2.11e-06
	159				2.13e-06
	161.5				2.16e-06
	164				2.18e-06
	166.5				2.21e-06
	169				2.23e-06
	171.5				2.26e-06
	174				2.28e-06
	176.5				2.3e-06
	179				2.32e-06
	181.5				2.34e-06
	184				2.36e-06
	186.5				2.38e-06
	189				2.4e-06
	191.5				2.42e-06
	194				2.44e-06
	196.5				2.45e-06
	199				2.47e-06
	201.5				2.48e-06
	204				2.5e-06
	206.5				2.51e-06
	209				2.53e-06
	211.5				2.54e-06
	214				2.55e-06
	216.5				2.57e-06
	219				2.58e-06
	221.5				2.59e-06
	224				2.6e-06
	226.5				2.61e-06
	229				2.62e-06
	231.5				2.63e-06
	234				2.64e-06
	236.5				2.65e-06
	239				2.66e-06
	241.5				2.67e-06
	244				2.68e-06
	246.5				2.69e-06
	249				2.69e-06
	251.5				2.7e-06
	254				2.71e-06
	256.5				2.71e-06
	259				2.72e-06
	261.5				2.73e-06
	264				2.73e-06
	266.5				2.74e-06
	269				2.75e-06
	271.5				2.75e-06
	274				2.76e-06
	276.5				2.76e-06
	279				2.77e-06
	281.5				2.77e-06
	284				2.77e-06
	286.5				2.78e-06
	289				2.78e-06
	291.5				2.79e-06
	294				2.79e-06
	296.5				2.79e-06
	299				2.8e-06
	301.5				2.8e-06
	304				2.8e-06
	306.5				2.81e-06
	309				2.81e-06
	311.5				2.81e-06
	314				2.82e-06
	316.5				2.82e-06
	319				2.82e-06
	321.5				2.82e-06
	324				2.83e-06
	326.5				2.83e-06
	329				2.83e-06
	331.5				2.83e-06
	334				2.83e-06
	336.5				2.84e-06
	339				2.84e-06
	341.5				2.84e-06
	344				2.84e-06
	346.5				2.84e-06
	349				2.84e-06
	351.5				2.85e-06
	354				2.85e-06
	356.5				2.85e-06
	359				2.85e-06
	28.33					1.02e-07
	38.33					2.87e-07
	48.33					4.91e-07
	58.33					7.28e-07
	68.33					9.6e-07
	78.33					1.18e-06
	88.33					1.39e-06
	98.33					1.59e-06
	108.33					1.75e-06
	118.33					1.92e-06
	128.33					2.06e-06
	138.33					2.18e-06
	148.33					2.29e-06
	158.33					2.39e-06
	168.33					2.47e-06
	178.33					2.54e-06
	188.33					2.6e-06
	198.33					2.67e-06
	208.33					2.7e-06
	218.33					2.73e-06
	228.33					2.78e-06
	238.33					2.8e-06
	248.33					2.83e-06
	258.33					2.84e-06
	268.33					2.86e-06
	278.33					2.86e-06
	288.33					2.86e-06
	298.33					2.89e-06
	308.33					2.9e-06
	318.33					2.9e-06
	328.33					2.87e-06
	338.33					2.89e-06
	348.33					2.9e-06
	358.33					2.89e-06
	28.33						2.1e-07
	30.83						2.47e-07
	33.33						2.87e-07
	35.83						3.28e-07
	38.33						3.72e-07
	40.83						4.18e-07
	43.33						4.65e-07
	45.83						5.14e-07
	48.33						5.64e-07
	50.83						6.16e-07
	53.33						6.68e-07
	55.83						7.22e-07
	58.33						7.76e-07
	60.83						8.3e-07
	63.33						8.85e-07
	65.83						9.4e-07
	68.33						9.95e-07
	70.83						1.05e-06
	73.33						1.11e-06
	75.83						1.16e-06
	78.33						1.21e-06
	80.83						1.27e-06
	83.33						1.32e-06
	85.83						1.37e-06
	88.33						1.43e-06
	90.83						1.48e-06
	93.33						1.53e-06
	95.83						1.58e-06
	98.33						1.62e-06
	100.83						1.67e-06
	103.33						1.72e-06
	105.83						1.76e-06
	108.33						1.81e-06
	110.83						1.85e-06
	113.33						1.89e-06
	115.83						1.93e-06
	118.33						1.97e-06
	120.83						2.01e-06
	123.33						2.04e-06
	125.83						2.08e-06
	128.33						2.11e-06
	130.83						2.14e-06
	133.33						2.18e-06
	135.83						2.21e-06
	138.33						2.24e-06
	140.83						2.27e-06
	143.33						2.29e-06
	145.83						2.32e-06
	148.33						2.34e-06
	150.83						2.37e-06
	153.33						2.39e-06
	155.83						2.41e-06
	158.33						2.44e-06
	160.83						2.46e-06
	163.33						2.48e-06
	165.83						2.5e-06
	168.33						2.51e-06
	170.83						2.53e-06
	173.33						2.55e-06
	175.83						2.56e-06
	178.33						2.58e-06
	180.83						2.59e-06
	183.33						2.61e-06
	185.83						2.62e-06
	188.33						2.63e-06
	190.83						2.64e-06
	193.33						2.66e-06
	195.83						2.67e-06
	198.33						2.68e-06
	200.83						2.69e-06
	203.33						2.7e-06
	205.83						2.71e-06
	208.33						2.71e-06
	210.83						2.72e-06
	213.33						2.73e-06
	215.83						2.74e-06
	218.33						2.74e-06
	220.83						2.75e-06
	223.33						2.76e-06
	225.83						2.76e-06
	228.33						2.77e-06
	230.83						2.78e-06
	233.33						2.78e-06
	235.83						2.79e-06
	238.33						2.79e-06
	240.83						2.79e-06
	243.33						2.8e-06
	245.83						2.8e-06
	248.33						2.81e-06
	250.83						2.81e-06
	253.33						2.81e-06
	255.83						2.82e-06
	258.33						2.82e-06
	260.83						2.82e-06
	263.33						2.83e-06
	265.83						2.83e-06
	268.33						2.83e-06
	270.83						2.83e-06
	273.33						2.84e-06
	275.83						2.84e-06
	278.33						2.84e-06
	280.83						2.84e-06
	283.33						2.84e-06
	285.83						2.85e-06
	288.33						2.85e-06
	290.83						2.85e-06
	293.33						2.85e-06
	295.83						2.85e-06
	298.33						2.85e-06
	300.83						2.85e-06
	303.33						2.86e-06
	305.83						2.86e-06
	308.33						2.86e-06
	310.83						2.86e-06
	313.33						2.86e-06
	315.83						2.86e-06
	318.33						2.86e-06
	320.83						2.86e-06
	323.33						2.86e-06
	325.83						2.86e-06
	328.33						2.86e-06
	330.83						2.87e-06
	333.33						2.87e-06
	335.83						2.87e-06
	338.33						2.87e-06
	340.83						2.87e-06
	343.33						2.87e-06
	345.83						2.87e-06
	348.33						2.87e-06
	350.83						2.87e-06
	353.33						2.87e-06
	355.83						2.87e-06
	358.33						2.87e-06
	27.67							2.48e-07
	37.67							5.32e-07
	47.67							8.17e-07
	57.67							1.1e-06
	67.67							1.38e-06
	77.67							1.63e-06
	87.67							1.83e-06
	97.67							2.03e-06
	107.67							2.18e-06
	117.67							2.32e-06
	127.67							2.46e-06
	137.67							2.53e-06
	147.67							2.63e-06
	157.67							2.69e-06
	167.67							2.75e-06
	177.67							2.79e-06
	187.67							2.81e-06
	197.67							2.84e-06
	207.67							2.88e-06
	217.67							2.87e-06
	227.67							2.89e-06
	237.67							2.87e-06
	247.67							2.89e-06
	257.67							2.89e-06
	267.67							2.88e-06
	277.67							2.88e-06
	287.67							2.88e-06
	297.67							2.89e-06
	307.67							2.88e-06
	317.67							2.88e-06
	327.67							2.88e-06
	337.67							2.87e-06
	347.67							2.88e-06
	357.67							2.9e-06
	27.67								3.27e-07
	30.17								3.84e-07
	32.67								4.43e-07
	35.17								5.06e-07
	37.67								5.7e-07
	40.17								6.37e-07
	42.67								7.05e-07
	45.17								7.75e-07
	47.67								8.45e-07
	50.17								9.16e-07
	52.67								9.88e-07
	55.17								1.06e-06
	57.67								1.13e-06
	60.17								1.2e-06
	62.67								1.27e-06
	65.17								1.34e-06
	67.67								1.41e-06
	70.17								1.48e-06
	72.67								1.54e-06
	75.17								1.6e-06
	77.67								1.67e-06
	80.17								1.73e-06
	82.67								1.78e-06
	85.17								1.84e-06
	87.67								1.9e-06
	90.17								1.95e-06
	92.67								2e-06
	95.17								2.05e-06
	97.67								2.09e-06
	100.17								2.14e-06
	102.67								2.18e-06
	105.17								2.22e-06
	107.67								2.26e-06
	110.17								2.3e-06
	112.67								2.33e-06
	115.17								2.36e-06
	117.67								2.39e-06
	120.17								2.42e-06
	122.67								2.45e-06
	125.17								2.48e-06
	127.67								2.5e-06
	130.17								2.53e-06
	132.67								2.55e-06
	135.17								2.57e-06
	137.67								2.59e-06
	140.17								2.61e-06
	142.67								2.63e-06
	145.17								2.64e-06
	147.67								2.66e-06
	150.17								2.67e-06
	152.67								2.69e-06
	155.17								2.7e-06
	157.67								2.71e-06
	160.17								2.72e-06
	162.67								2.73e-06
	165.17								2.74e-06
	167.67								2.75e-06
	170.17								2.76e-06
	172.67								2.77e-06
	175.17								2.78e-06
	177.67								2.78e-06
	180.17								2.79e-06
	182.67								2.8e-06
	185.17								2.8e-06
	187.67								2.81e-06
	190.17								2.81e-06
	192.67								2.82e-06
	195.17								2.82e-06
	197.67								2.82e-06
	200.17								2.83e-06
	202.67								2.83e-06
	205.17								2.83e-06
	207.67								2.84e-06
	210.17								2.84e-06
	212.67								2.84e-06
	215.17								2.85e-06
	217.67								2.85e-06
	220.17								2.85e-06
	222.67								2.85e-06
	225.17								2.85e-06
	227.67								2.85e-06
	230.17								2.86e-06
	232.67								2.86e-06
	235.17								2.86e-06
	237.67								2.86e-06
	240.17								2.86e-06
	242.67								2.86e-06
	245.17								2.86e-06
	247.67								2.86e-06
	250.17								2.87e-06
	252.67								2.87e-06
	255.17								2.87e-06
	257.67								2.87e-06
	260.17								2.87e-06
	262.67								2.87e-06
	265.17								2.87e-06
	267.67								2.87e-06
	270.17								2.87e-06
	272.67								2.87e-06
	275.17								2.87e-06
	277.67								2.87e-06
	280.17								2.87e-06
	282.67								2.87e-06
	285.17								2.87e-06
	287.67								2.87e-06
	290.17								2.87e-06
	292.67								2.87e-06
	295.17								2.87e-06
	297.67								2.87e-06
	300.17								2.87e-06
	302.67								2.87e-06
	305.17								2.87e-06
	307.67								2.87e-06
	310.17								2.87e-06
	312.67								2.87e-06
	315.17								2.87e-06
	317.67								2.87e-06
	320.17								2.88e-06
	322.67								2.88e-06
	325.17								2.88e-06
	327.67								2.88e-06
	330.17								2.88e-06
	332.67								2.88e-06
	335.17								2.88e-06
	337.67								2.88e-06
	340.17								2.88e-06
	342.67								2.88e-06
	345.17								2.88e-06
	347.67								2.88e-06
	350.17								2.88e-06
	352.67								2.88e-06
	355.17								2.88e-06
	357.67								2.88e-06
	27									2.71e-07
	37									6.29e-07
	47									9.74e-07
	57									1.27e-06
	67									1.57e-06
	77									1.8e-06
	87									1.98e-06
	97									2.14e-06
	107									2.3e-06
	117									2.41e-06
	127									2.53e-06
	137									2.65e-06
	147									2.73e-06
	157									2.77e-06
	167									2.79e-06
	177									2.85e-06
	187									2.85e-06
	197									2.88e-06
	207									2.87e-06
	217									2.87e-06
	227									2.88e-06
	237									2.9e-06
	247									2.88e-06
	257									2.9e-06
	267									2.87e-06
	277									2.87e-06
	287									2.89e-06
	297									2.89e-06
	307									2.89e-06
	317									2.89e-06
	327									2.89e-06
	337									2.89e-06
	347									2.89e-06
	27										3.4e-07
	29.5										4e-07
	32										4.63e-07
	34.5										5.29e-07
	37										5.97e-07
	39.5										6.67e-07
	42										7.39e-07
	44.5										8.13e-07
	47										8.87e-07
	49.5										9.61e-07
	52										1.04e-06
	54.5										1.11e-06
	57										1.19e-06
	59.5										1.26e-06
	62										1.33e-06
	64.5										1.4e-06
	67										1.47e-06
	69.5										1.54e-06
	72										1.61e-06
	74.5										1.67e-06
	77										1.74e-06
	79.5										1.8e-06
	82										1.86e-06
	84.5										1.91e-06
	87										1.97e-06
	89.5										2.02e-06
	92										2.07e-06
	94.5										2.12e-06
	97										2.16e-06
	99.5										2.21e-06
	102										2.25e-06
	104.5										2.29e-06
	107										2.32e-06
	109.5										2.36e-06
	112										2.39e-06
	114.5										2.42e-06
	117										2.45e-06
	119.5										2.48e-06
	122										2.51e-06
	124.5										2.53e-06
	127										2.55e-06
	129.5										2.58e-06
	132										2.6e-06
	134.5										2.62e-06
	137										2.63e-06
	139.5										2.65e-06
	142										2.67e-06
	144.5										2.68e-06
	147										2.7e-06
	149.5										2.71e-06
	152										2.72e-06
	154.5										2.73e-06
	157										2.74e-06
	159.5										2.75e-06
	162										2.76e-06
	164.5										2.77e-06
	167										2.78e-06
	169.5										2.78e-06
	172										2.79e-06
	174.5										2.8e-06
	177										2.8e-06
	179.5										2.81e-06
	182										2.81e-06
	184.5										2.82e-06
	187										2.82e-06
	189.5										2.83e-06
	192										2.83e-06
	194.5										2.83e-06
	197										2.84e-06
	199.5										2.84e-06
	202										2.84e-06
	204.5										2.85e-06
	207										2.85e-06
	209.5										2.85e-06
	212										2.85e-06
	214.5										2.85e-06
	217										2.86e-06
	219.5										2.86e-06
	222										2.86e-06
	224.5										2.86e-06
	227										2.86e-06
	229.5										2.86e-06
	232										2.86e-06
	234.5										2.86e-06
	237										2.87e-06
	239.5										2.87e-06
	242										2.87e-06
	244.5										2.87e-06
	247										2.87e-06
	249.5										2.87e-06
	252										2.87e-06
	254.5										2.87e-06
	257										2.87e-06
	259.5										2.87e-06
	262										2.87e-06
	264.5										2.87e-06
	267										2.87e-06
	269.5										2.87e-06
	272										2.87e-06
	274.5										2.87e-06
	277										2.87e-06
	279.5										2.87e-06
	282										2.87e-06
	284.5										2.87e-06
	287										2.87e-06
	289.5										2.87e-06
	292										2.87e-06
	294.5										2.87e-06
	297										2.87e-06
	299.5										2.87e-06
	302										2.87e-06
	304.5										2.87e-06
	307										2.87e-06
	309.5										2.88e-06
	312										2.88e-06
	314.5										2.88e-06
	317										2.88e-06
	319.5										2.88e-06
	322										2.88e-06
	324.5										2.88e-06
	327										2.88e-06
	329.5										2.88e-06
	332										2.88e-06
	334.5										2.88e-06
	337										2.88e-06
	339.5										2.88e-06
	342										2.88e-06
	344.5										2.88e-06
	347										2.88e-06
