# Supplementary material for: Synergy between Wsp1 and Dip1 may initiate assembly of endocytic actin networks
Source: eLife journal article supplement (doi:10.7554/elife.60419), 2020-11-12
Supplement: supp [file elife_poa_e60419_Figure_1_source_data_1.xlsx]

## Sheet: Panel B
		Time Course of Fim1 Intensity in Endocytic Patches
	Time	WT Fim1 intensity		wsp1∆CA Fim1 intensity		dip1∆ Fim1 Intensity		wsp1∆CA/dip1∆ Fim1 Intensity
		Ave	SD	Ave	SD	Ave	SD	Ave	SD
	-12
	-11			-0.085987	0.0404105			0.0371116	0.132376
	-10			-0.0547309	0.0417045			-0.0356902	0.116976
	-9			-0.045937	0.0372096	-0.0793308	0.0575757	-0.01419	0.139091
	-8	-0.0285782	0.022177	-0.0154687	0.0785756	-0.102275	0.0244196	0.123519	0.241133
	-7	-0.0271017	0.0255982	0.0292557	0.0934694	-0.0556963	0.0859428	0.377191	0.344707
	-6	0.00127389	0.0621632	0.0868285	0.145436	0.0502066	0.234274	0.727322	0.374911
	-5	0.037681	0.116879	0.233598	0.17947	0.232763	0.429415	1.11143	0.493485
	-4	0.156853	0.172145	0.409509	0.174917	0.589863	0.650819	1.45065	0.540601
	-3	0.365481	0.207419	0.597403	0.185462	1.00979	0.686092	1.78329	0.535489
	-2	0.610586	0.201572	0.743004	0.215917	1.66615	0.711399	2.0299	0.609693
	-1	0.806082	0.18518	0.829146	0.227283	2.32676	0.614038	2.25004	0.6702
	0	1	0.195456	0.916427	0.224174	2.7861	0.905279	2.57141	0.812398
	1	0.878279	0.200584	0.839998	0.222082	2.3358	0.799224	2.31021	0.733599
	2	0.773475	0.233322	0.776836	0.245609	1.88995	0.825082	2.1269	0.697182
	3	0.609283	0.209272	0.658563	0.268727	1.69273	0.833524	1.90527	0.69562
	4	0.460118	0.218454	0.512505	0.247409	1.48422	0.797136	1.75124	0.828672
	5	0.369641	0.174993	0.39136	0.239811	1.30199	0.638223	1.59978	0.780005
	6	0.279577	0.1745	0.308717	0.23427	1.1769	0.546334	1.45186	0.769796
	7	0.160157	0.145114	0.204886	0.21742	0.856557	0.553499	1.30097	0.746156
	8	0.102556	0.14655	0.134856	0.181293	0.661379	0.428481	1.14144	0.71041
	9	0.0455824	0.122084	0.0987176	0.176406	0.539144	0.422566	0.936774	0.639524
	10	0.0547704	0.122271	0.0716792	0.150909	0.391402	0.253393	0.776741	0.553081
	11	0.0154822	0.124525	0.0572826	0.161638	0.319845	0.274148	0.693295	0.525201
	12	0.0538102	0.119207	0.0569094	0.184503	0.268757	0.233228	0.712642	0.453274
	13			0.0519758	0.165511	0.232957	0.216213	0.690412	0.483413
	14			0.0647529	0.154231	0.199403	0.160735	0.598356	0.497003
	15			0.0578057	0.148484	0.151437	0.121127	0.505636	0.42663
	16					0.0642751	0.136314	0.420305	0.358312
	17					0.0588603	0.0519414	0.34474	0.322175
	18							0.227215	0.292833
	19							0.239186	0.287445
	20							0.213426	0.310755
	21							0.161057	0.343406
	22							0.112598	0.227041
	23							0.145069	0.232708
	24							0.267472	0.321337
	Measured Values
		WT Fim1 intensity Biological Replicates
	Time	Average	Patch 1	Patch 2	Patch 3	Patch 4	Patch 5	Patch 6	Patch 7	Patch 8	Patch 9	Patch 10	Patch 11	Patch 12	Patch 13	Patch 14	Patch 15	Patch 16	Patch 17	Patch 18
	-10	-0.0775212	-0.0775212
	-9	-0.0583571	-0.0393776														-0.0773365
	-8	-0.0285782	-0.00708737												-0.0272644		-0.0513829
	-7	-0.0271017	-0.000178441			-0.0414787	-0.0541028								-0.0495478	0.00602962	-0.023332
	-6	0.00127389	0.115381	-0.0344843		-0.0700091	-0.0491039	-0.0585537	-0.00772322	-0.0221744	-0.0146799	0.119224	-0.019924	-0.0228077	-0.0500721	0.0123214	0.121903	0.0238563	0.0238563	-0.0453533
	-5	0.037681	0.302824	0.0242001	-0.0499886	-0.0143783	-0.0254793	-0.0141421	-0.0185403	-0.00343059	0.0162482	0.0934	-0.0734041	-0.00734041	0.103028	0.068161	0.357321	-0.00812688	-0.00812688	-0.0639664
	-4	0.156853	0.487106	0.121222	-0.021991	0.119098	0.0880342	0.0934879	0.0931537	0.162695	0.113539	0.141654	0.0555774	0.0414209	0.214707	0.225193	0.688426	0.0996199	0.0996199	0.000786473
	-3	0.365481	0.745863	0.415576	0.152871	0.394178	0.264077	0.357922	0.282552	0.411261	0.316441	0.290218	0.315376	0.214183	0.448814	0.46664	0.965526	0.204483	0.204483	0.128195
	-2	0.610586	1.03261	0.644365	0.314066	0.651603	0.519529	0.692084	0.597571	0.656258	0.526127	0.540505	0.599292	0.651462	0.699174	0.78123	1.00983	0.382488	0.382488	0.30987
	-1	0.806082	1.05892	0.913336	0.530942	1.01109	0.82731	0.957938	0.804781	0.767381	0.778618	0.827176	0.912308	1.04155	0.713331	0.891598	0.939311	0.531656	0.531656	0.470573
	0	1	1.07088	1.32872	0.913328	1.11333	0.910239	1.14405	0.873694	0.865114	0.84071	0.939926	1.08848	1.54149	0.77887	0.97575	1.05545	0.884782	0.884782	0.790405
	1	0.878279	0.802723	1.1432	0.908654	0.854244	0.892601	1.04262	0.774383	0.629678	0.642354	0.876215	0.785162	1.4631	0.751344	0.966837	1.01429	0.797745	0.797745	0.666142
	2	0.773475	0.775768	1.01787	0.903202	0.49745	0.724767	0.819026	0.694444	0.394663	0.564833	0.847092	0.811378	1.45707	0.580679	0.736925	0.989383	0.692096	0.692096	0.723817
	3	0.609283	0.644692	0.428708	0.753041	0.520869	0.637439	0.771518	0.65437	0.329902	0.415823	0.742445	0.257177	1.1881	0.462446	0.650675	0.790143	0.58566	0.58566	0.548434
	4	0.460118	0.123908	0.363039	0.664406	0.27457	0.247907	0.517524	0.558073	0.330048	0.264706	0.773046	0.19688	0.979158	0.328483	0.536112	0.636781	0.524315	0.524315	0.438852
	5	0.369641	0.0993137	0.45183	0.559264	0.211764	0.277747	0.216813	0.447459	0.255801	0.108899	0.725923	0.363088	0.604535	0.159654	0.486827	0.409752	0.466378	0.466378	0.342116
	6	0.279577	0.0382316	0.271683	0.443013	-0.0049888	0.208097	0.221319	0.333383	0.227102	0.102299	0.722467	0.258225	0.464019	0.0878228	0.450125	0.347883	0.315376	0.315376	0.230961
	7	0.160157	0.0316795	0.109412	0.211985	0.0114177	0.080228	0.159164	0.179057	0.0701147	0.0250596	0.605568	0.137108	0.348932	-0.0393236	0.221785	0.189802	0.169092	0.169092	0.202648
	8	0.102556		0.224737	0.159064		0.0470028	0.00529291	0.0727159	-0.0150393	0.0916583	0.563657	-0.00157295	0.140516	-0.0972605	0.173024	0.0804824	0.084939	0.084939	0.0267401
	9	0.0455824			0.0783104		0.015841	-0.0888862	-0.0266178	0.0321621		0.417356	0.024905	0.00734041	-0.114825	0.0901822	0.0623935	0.0526937	0.0526937	0.0346048
	10	0.0547704			0.0411143			-0.0560882	0.00673552			0.355937		-0.0188753		0.0435182		0.07655	0.07655	-0.0325075
	11	0.0154822			-0.049682							0.237723		-0.0264779		-0.0429938				-0.0411587
	12	0.0538102			0.0167558							0.187144				-0.0424695
	13	0.0895673										0.0895673
	14	0.0343059										0.0343059
	15	0.0601924										0.0601924
		wsp1∆CA Fim1 intensity Biological Replicates
	Time	Average	Patch 1	Patch 2	Patch 3	Patch 4	Patch 5	Patch 6	Patch 7	Patch 8	Patch 9	Patch 10	Patch 11	Patch 12	Patch 13	Patch 14	Patch 15	Patch 16	Patch 17	Patch 18
	-11	-0.085987					-0.114562											-0.0574125
	-10	-0.0547309					-0.114323							-0.0209726		-0.0319832		-0.051645
	-9	-0.045937					-0.0896929						-0.0503343	-0.0306724		-0.0671123		0.00812688
	-8	-0.0154687			-0.0211339		-0.192724	-0.0277966	0.0489657	0.00241775	0.00623789	0.0964536	-0.0713069	0.00262158	-0.0993577	-0.0238563		0.104339	-0.0259536
	-7	0.0292557	-0.0846463	0.0603809	-0.0214003	-0.082025	-0.0375103	0.0167558	0.0138279	-0.0477065	-0.0301791	0.0665157	0.130817	0.205794	-0.066588	0.128719	0.019924	0.214183	0.0104863
	-6	0.0868285	-0.0538339	0.0674708	-0.00371459	-0.0956745	0.1474	0.0283218	0.013363	-0.0208726	0.0359068	0.172557	0.243282	0.439638	0.0377507	0.294403	-0.0356534	0.259012	0.10329	-0.0697339
	-5	0.233598	0.101902	0.165947	0.17123	0.116839	0.17112	0.185232	0.264419	0.0654024	0.0830429	0.337756	0.36335	0.707563	0.235417	0.514353	0.0600341	0.387731	0.288635	-0.0152051
	-4	0.409509	0.329259	0.347394	0.382092	0.428987	0.350548	0.388757	0.535863	0.209515	0.231878	0.46284	0.548434	0.739809	0.344213	0.761568	0.244593	0.518548	0.475554	0.0713069
	-3	0.597403	0.588797	0.57034	0.72121	0.778095	0.426569	0.548128	0.83537	0.43533	0.407725	0.559005	0.610565	0.806921	0.441998	0.986761	0.465592	0.679512	0.662472	0.228864
	-2	0.743004	0.788382	0.831967	0.94634	0.896992	0.463479	0.637155	1.08399	0.58033	0.624081	0.71509	0.563901	0.904706	0.554201	1.16608	0.638616	0.877966	0.767597	0.333202
	-1	0.829146	0.946938	0.943103	1.10386	1.04402	0.478169	0.757999	1.22715	0.70226	0.751827	0.829305	0.637305	0.882947	0.596671	1.18784	0.710971	0.907327	0.809805	0.407131
	0	0.916427	1.00266	1.11407	1.1869	1.10245	0.638489	0.795846	1.3085	0.852399	0.864219	0.957461	0.638878	0.957924	0.683183	1.19334	0.712544	1.03395	0.959497	0.493381
	1	0.839998	0.908938	0.998007	1.17499	1.06774	0.572622	0.756883	1.23772	0.733784	0.801194	0.848677	0.489448	0.893957	0.643859	1.05414	0.703893	0.939573	0.850177	0.444357
	2	0.776836	0.932751	0.981724	1.15153	0.791476	0.405174	0.614548	1.21223	0.744139	0.807872	0.714389	0.388255	0.922795	0.594835	1.06252	0.648578	0.917027	0.667977	0.42522
	3	0.658563	0.814819	0.950391	1.09202	0.55713	0.355278	0.459639	1.10708	0.591655	0.759216	0.550829	0.0841526	0.910998	0.553939	0.833137	0.538472	0.799318	0.486564	0.40949
	4	0.512505	0.629889	0.778847	0.947209	0.366462	0.25088	0.327256	0.855229	0.521243	0.63575	0.180514	0.0629178	0.848604	0.500459	0.68292	0.463232	0.445144	0.412636	0.3159
	5	0.39136	0.358254	0.620042	0.894165	0.321364	0.126555	0.204285	0.659058	0.334401	0.478651	0.133034	0.0652772	0.818194	0.384585	0.597719	0.350242	0.224145	0.19321	0.281295
	6	0.308717	0.212935	0.528416	0.725488	0.0869183	-0.00520243	0.0727687	0.523269	0.220324	0.453916	0.1048		0.792502	0.340281	0.460349	0.245642	0.16044	0.148643	0.176694
	7	0.204886	0.00408152	0.39109	0.547793	0.00929149	-0.083631	0.0304129	0.349621	0.104511	0.344326	0.121134		0.738236	0.190064	0.329532	0.17984	0.0490235	0.0550531	0.12269
	8	0.134856	0.0150896	0.307464	0.400406	-0.0194702	-0.170796	0.0545602	0.217349	0.00614993	0.112968			0.582776	0.08992	0.24669	0.121117	0.0448289	0.0702582	0.0783851
	9	0.0987176		0.255889	0.317941	-0.0200231	-0.167297	0.0300258	0.0728642	-0.0274522	0.0498503			0.521431	0.0304103	0.136322	0.0212348			0.0621313
	10	0.0716792		0.149209	0.265676		-0.166375	0.0258513	0.0724244	-0.0586593	0.0605543			0.414209	0.0484991	0.0671123	-0.0123214			-0.00602962
	11	0.0572826		0.166015	0.147985		-0.182809		0.0766316	-0.01801				0.418666	0.00707825	0.029886	-0.0393236			-0.033294
	12	0.0569094			0.10866									0.40582	-0.0285752	0.00891336	-0.0610827			-0.0922795
	13	0.0519758			0.0286561									0.33294	-0.028313	0.0262158				-0.0996199
	14	0.0647529												0.17381	-0.0443046
	15	0.0578057												0.1628	-0.0471884
		dip1∆ Fim1 Intensity Biological Replicates
	Time	Average	Patch 1	Patch 2	Patch 3	Patch 4	Patch 5	Patch 6	Patch 7	Patch 8	Patch 9	Patch 10	Patch 11	Patch 12	Patch 13	Patch 14	Patch 15	Patch 16
	-9	-0.0793308						-0.120043			-0.0386186
	-8	-0.102275						-0.103385			-0.067413		-0.117971	-0.12033
	-7	-0.0556963		-0.147483	-0.0474678	-0.0996278	-0.0813992	0.106974	-0.034605	-0.0967527	0.00543616	-0.0592476	-0.135011	-0.164111			0.084939
	-6	0.0502066	0.0132172	-0.171512	-0.0221342	-0.0901529	-0.0521575	0.587307	-0.0147503	-0.00904268	0.585331	-0.0490235	0.0387993	-0.0618692			0.0484991	-0.0996199
	-5	0.232763	-0.0536378	-0.0204528	0.150775	-0.0737891	-0.02561	1.22487	0.014886	0.0379551	1.15922	0.00969983	0.533753	0.65854	-0.0508586	0.00943767	0.180627	-0.0311967
	-4	0.589863	0.0658246	0.558899	0.428188	0.127713	0.0356605	1.69321	0.35564	0.278594	1.82068	0.325862	1.09346	1.77166	-0.114563	-0.0238563	0.654607	0.366234
	-3	1.00979	0.514963	1.26923	0.763254	0.705035	0.450453	0.908895	0.846594	0.648595	2.2447	0.82501	1.3855	2.71726	0.370953	0.0364399	1.38026	1.08953
	-2	1.66615	1.71643	2.41854	1.18994	1.50264	1.23497	0.948247	1.61541	1.0569	2.87156	1.44868	1.5816	3.02268	1.15297	0.481059	2.42129	1.99554
	-1	2.32676	2.39206	3.10325	3.30699	2.10169	1.84462	1.60221	2.02712	1.67769	2.72947	2.17958	2.20684	2.50151	2.25849	1.23555	3.45104	2.61004
	0	2.7861	2.54003	3.71034	4.40114	2.289	2.08751	1.87617	2.2818	1.84842	3.40081	2.53061	2.28706	3.16424	2.92699	1.77953	4.83025	2.62367
	1	2.3358	2.18158	3.38391	4.01965	2.1159	1.84948	1.53962	1.71397	1.21762	2.9562	2.51855	1.47726	3.07668	2.84205	1.68331	2.9789	1.81806
	2	1.88995	1.82759	3.05703	2.9895	1.1917	1.58538	0.531472	1.34656	1.30082	2.76261	2.49417	0.6415	2.62813	2.87561	1.29008	1.90772	1.80941
	3	1.69273	1.40241	2.94244	3.15827	1.0896	1.02021	0.450083	1.03239	0.839959	2.56142	2.17224	1.28746	2.00813	2.92279	1.19308	1.60178	1.40149
	4	1.48422	0.609094	2.74898	2.36341	1.01889	0.711155	0.258176	0.56332	1.06465	2.25101	1.79971	1.04208	1.7617	2.79643	1.13619	1.68017	1.94259
	5	1.30199	1.29666	2.06559	2.09867	0.938501	0.672805	0.168287	0.525405	1.18692	1.96499	1.56167	0.546074	1.59969	2.2674	0.872198	1.72264	1.34434
	6	1.1769	1.19563	2.13092	1.6944	0.809272	0.479038	0.147065	0.595146	0.965074	1.56881	1.27068	1.01848	1.48591	1.82016	0.630489	1.41985	1.59942
	7	0.856557	1.30416	1.41983	1.64295	0.266181	0.268674	0.104536	0.289529	0.38935	0.960052	1.08795	0.433871	1.32888	1.82671	0.66588	0.529296	1.18705
	8	0.661379	0.78332	1.13764	0.88565	0.145135	0.214853	0.0903464	0.303302	0.369355	0.805042	0.431249	0.247477	1.04706	1.56298	0.807183	0.614235	1.13724
	9	0.539144	0.312611	1.16406	0.473833	0.0345874	0.161233		0.030717	0.0953854	0.764008	0.638354	0.175121	1.12806	1.09608	0.768384	0.245117	0.999607
	10	0.391402	0.245442	0.674336	0.267767	0.11754	0.148337		0.0955589	0.0803713	0.548148	0.564687	0.173024	0.578057	0.580679	0.768384	0.270809	0.757897
	11	0.319845	0.123898	0.540666	0.107683		-0.0322325		0.000291537	0.0539419	0.283128	0.484467		0.623149	0.435182	0.753179	0.126884	0.657753
	12	0.268757	0.127565	0.666354	0.0569		-0.0298172		-0.0174922		0.274244	0.337921		0.403723	0.185608	0.467951	0.13973	0.6124
	13	0.232957	0.0947898	0.745368	0.115424						0.095971	0.190326		0.218902	0.1434	0.122165	0.108271	0.494953
	14	0.199403	0.0847845	0.489049							0.0744802	0.309608		0.115874	0.0193997	0.175646		0.326386
	15	0.151437		0.316353							0.011943			0.0720933	0.132127			0.224669
	16	0.0642751		0.23034							-0.0872777				0.00655394			0.107485
	17	0.0588603		0.119025							0.00657215				0.0256914			0.0841526
	18	0.149204		0.149204
		wsp1∆CA/dip1∆ Fim1 Intensity Biological Replicates
	Time	Average	Patch 1	Patch 2	Patch 3	Patch 4	Patch 5	Patch 6	Patch 7	Patch 8	Patch 9	Patch 10	Patch 11	Patch 12	Patch 13	Patch 14	Patch 15	Patch 16	Patch 17	Patch 18
	-13	-0.0668502											-0.0668502
	-12	-0.0634421											-0.0634421
	-11	0.0371116						-0.104426	0.195549	0.0890445			-0.0317211
	-10	-0.0356902	-0.0010053	0.00486063		0.138194		-0.119663	0.158677	0.0659402	-0.173515		0.0188753	-0.11299		-0.1725	-0.150741			-0.0844147
	-9	-0.01419	0.00810524	-0.0017065	-0.0787678	0.131234	-0.183498	-0.0834199	0.233132	0.240116	-0.168536	-0.0862523	0.234369	-0.109582	-0.0925416	-0.151003	-0.0878228	-0.0319832	0.0673745	-0.0946389
	-8	0.123519	0.453265	0.239897	-0.0740203	0.382251	-0.237442	0.338945	0.42101	0.483891	-0.0985722	-0.105069	0.404771	0.0621313	-0.135273	-0.0922795	0.00235942	-0.0867742	0.0684231	0.195832
	-7	0.377191	1.07599	0.546833	-0.0361305	0.623834	-0.0555755	0.87483	0.718478	0.612045	0.470134	0.042112	0.661686	0.272906	0.00157295	0.0521694	0.14943	0.159916	0.0893957	0.52982
	-6	0.727322	1.62048	0.786419	0.371733	0.921439	0.358201	1.33125	0.939881	0.877286	1.0979	0.623875	0.84572	0.551317	0.494429	0.177481	0.434657	0.640189	0.266876	0.752654
	-5	1.11143	2.23268	1.00252	0.834827	1.28019	0.698588	2.06652	1.30012	1.11934	1.65345	1.11389	1.21379	0.759733	0.814261	0.25639	0.576747	1.21169	0.789881	1.08114
	-4	1.45065	2.80589	1.12114	1.25716	1.50039	0.854445	2.26009	1.44941	1.3155	1.94753	1.704	1.50242	1.32285	1.24184	0.444619	0.917027	1.86551	1.48355	1.11836
	-3	1.78329	2.83322	1.19862	1.68811	1.61823	1.10457	2.48136	1.49057	1.84939	2.30743	2.14347	1.8642	1.97378	1.60152	0.761568	1.07511	2.26871	2.0894	1.7499
	-2	2.0299	2.74372	1.38448	2.01811	1.86629	1.21258	2.46074	1.59015	2.23105	2.58811	2.76438	2.15494	2.71228	1.90772	0.680299	1.38786	2.70783	2.40739	1.72028
	-1	2.25004	2.8866	1.53064	2.06941	1.86151	1.62802	2.67247	1.58908	2.38709	3.00634	3.61275	2.42417	3.06515	1.95412	1.4222	1.2442	2.87325	2.442	1.83169
	0	2.57141	3.15419	1.62243	2.1278	2.16105	1.73766	2.78257	1.62315	2.47533	3.57106	4.51505	2.45982	3.42116	2.4787	3.29453	1.43505	3.01219	2.49993	1.91375
	1	2.31021	2.87513	1.57653	2.03194	1.78872	1.518	2.70983	1.51889	2.428	2.80563	4.46106	2.12112	3.05204	2.42103	2.31066	1.42011	2.45851	2.25298	1.83353
	2	2.1269	2.42048	1.54375	1.97212	1.59586	1.05626	2.58568	1.45821	2.20796	2.44318	4.09181	1.85345	2.9844	2.55132	2.04509	1.43662	2.25482	2.17355	1.60965
	3	1.90527	2.18389	1.55217	1.74215	1.39901	1.24513	2.64866	1.46006	1.95572	2.39881	3.95833	1.61174	2.7579	1.87862	1.62852	0.998296	1.50819	1.93315	1.43453
	4	1.75124	1.90649	1.45117	1.6906	1.04925	1.19706	2.59102	1.25572	1.64582	2.29139	4.26229	1.34828	2.62629	1.59549	2.10277	0.613711	1.01717	1.65474	1.22297
	5	1.59978	1.81718	1.47472	1.59309	0.945267	1.01994	2.49145	1.30645	1.38353	1.76954	3.78508	1.09189	2.35889	1.83222	2.17329	0.440163	0.650937	1.62852	1.03395
	6	1.45186	1.48018	1.30864	1.41387	0.735259	0.772481	2.37229	1.25185	1.1248	1.74931	3.63562	0.87246	1.97955	1.54883	2.25875	0.358894	0.730109	1.56062	0.979945
	7	1.30097	0.794565	1.26337	1.24894	0.641721	0.545753	2.28273	1.08431	1.00435	1.92924	3.06821	0.731157	1.96644	1.32075	2.33766	0.310132	0.781492	1.48093	0.62577
	8	1.14144	0.501394	1.11726	1.26534	0.51587	0.575879	2.20498	1.03915	0.850105	1.71764	2.38204	0.670337	2.01625	0.676366	2.3159	0.317211	0.707825	1.43138	0.240923
	9	0.936774	0.239136	0.897075	1.08055	0.411816	0.666987	2.00921	1.07215	0.689536	1.58521	1.5326	0.480797	2.10565	0.548696	1.71844	0.184559	0.433084	1.20016	0.00629178
	10	0.776741	0.247585	0.916797	0.969668	0.346789	0.588634	1.81222	1.09056	0.556974	1.07651	0.813404	0.341853	1.91716	0.322978	1.3218	0.163848	0.377769	1.15428	-0.0374885
	11	0.693295	0.226384	0.751756	0.858952	0.288353	0.51107	1.66435	1.40892	0.370003	0.871711	0.682886	0.309346	1.71503	0.253506	1.20645	0.1725	0.267401	0.930659	-0.00996199
	12	0.712642		0.698875	0.706075	0.215871	0.476354	1.52745	1.41426	0.269473	0.640143	0.652518	0.280771	1.45026	0.308822	1.03762		0.253506	0.757635
	13	0.690412		0.554232	0.516262		0.427818	1.41174	1.3959	0.213237	0.52303	0.739419	0.198191	1.60362	0.182724	1.00249		0.229912	0.667191
	14	0.598356		0.495025	0.451569		0.312556	1.0882	1.40967	0.0584582	0.370179	0.738459	0.144711	1.65212	0.0589855	0.810067		0.169878	0.617119
	15	0.505636		0.475593	0.352986		0.32292	0.713575	1.32781	0.0271431	0.329515	0.593987	0.143924	1.3682	0.0086512	0.756849		0.136322	0.521431
	16	0.420305		0.413907	0.338286		0.129621	0.571169	1.21389	0.0868278	0.0955664	0.377644		0.956089	0.0175646	0.440425			0.402674
	17	0.34474		0.426868	0.232131		0.0724445	0.420424	0.9749	0.0492648	-0.0338485	0.157749		0.867217		0.291257			0.333727
	18	0.227215		0.308549	0.139787		0.00964335	0.268182	0.984556	0.0310563	-0.0950663	0.0908239		0.426268		0.0870363			0.248525
	19	0.239186		0.29301	0.0652465			0.0859331	0.920096			0.0547738		0.169354		0.101455			0.22362
	20	0.213426		0.161122	-0.00468219			0.0348613	0.82972					0.0713069					0.188229
	21	0.161057		0.103913	-0.0753247			-0.0792453	0.829559					0.00209726					0.185345
	22	0.112598		0.0927666	-0.0434818			-0.110478	0.527843					0.0314589					0.177481
	23	0.145069		0.0553242				-0.0928848	0.457394										0.16044
	24	0.267472		0.0402522					0.494691
	25	0.40773							0.40773
	26	0.405428							0.405428
	27	0.37547							0.37547
	28	0.354331							0.354331
	29	0.337959							0.337959
	30	0.306335							0.306335
	31	0.294043							0.294043

## Sheet: Panel C
	Fim1 Assembly Time
	WT	Wsp1CA	Dip1	Wsp1CA/Dip1
	8.5	5.5	4.5	8.5
	4.5	5.5	5.5	8.5
	3.5	6.5	5.5	7.5
	5.5	5.5	5.5	8.5
	5.5	9.5	5.5	7.5
	4.5	6.5	7.5	9.5
	4.5	6.5	5.5	9.5
	4.5	6.5	5.5	9.5
	4.5	5.5	7.5	8.5
	4.5	6.5	5.5	7.5
	4.5	7.5	6.5	11.5
	4.5	8.5	6.5	8.5
	6.5	6.5	3.5	7.5
	5.5	8.5	3.5	8.5
	7.5	5.5	5.5	8.5
	4.5	9.5	4.5	7.5
	4.5	6.5		7.5
	4.5	4.5		8.5

## Sheet: Panel D
	Patch Initiation Rate (Patches/sec/µm²)
	WT	Dip1	Wsp1CA	Wsp1CA/Dip1
	0.02839	0.00993	0.01714	0.0038
	0.02687	0.0071	0.02155	0.00681
	0.02675	0.00693	0.01804	0.01106
	0.02878	0.00589	0.01404	0.00702
	0.04005	0.00816	0.01976	0.01106
	Measured Values						Pixel Correction Factor
							225 pixels/µm²
		New Patches	Time	Area	patches/second/um2
	WT	18	20	7132	0.0283932
		21	20	8791	0.0268741
		15	20	6309	0.0267475
		17	20	6646	0.0287767
		19	20	5337	0.0400506
	avg				0.0301684
	Wsp1CA	13	20	8532	0.0171414
		15	20	7831	0.021549
		15	20	9353	0.0180423
		12	20	9616	0.0140391
		15	20	8538	0.0197646
	avg				0.0181073
	Dip1	7	20	7931	0.00992939
		5	20	7918	0.00710407
		4	20	6493	0.00693054
		4	20	7640	0.00589005
		7	20	9650	0.00816062
	avg				0.00760293
	Wsp1CA/Dip1	3	20	8891	0.00379597
		5	20	8255	0.00681405
		8	20	8141	0.0110552
		5	20	8016	0.00701722
		8	20	8137	0.0110606
	avg				0.0079486

## Sheet: Panel E
	Patch Density (Patches/µm²)
	WT	Wsp1CA	Dip1	Wsp1CA/Dip1
	1.038	1.122	0.24	0.361
	1.119	1.071	0.322	0.521
	1.247	1.141	0.546	0.401
	1.08	1.31	0.34	0.39
	1.473	1.049	0.37	0.555
	Measured Values
						Pixel Correction Factor
		Area (pixels)	Patch Count	Patches/µm²		225 pixels/µm²
	WT
	1	5635	26	1.03815
	2	6633	33	1.1194
	3	7039	39	1.24663
	4	7081	34	1.08036
	5	5806	38	1.47261
	avg			1.19143
	Wsp1CA
	1	7621	38	1.1219
	2	7776	37	1.0706
	3	6112	31	1.1412
	4	6868	40	1.31043
	5	7935	37	1.04915
	avg			1.13865
	Dip1
	1	6558	7	0.240165
	2	8375	12	0.322388
	3	6596	16	0.545785
	4	8606	13	0.339879
	5	7914	13	0.369598
	avg			0.363563
	Wsp1CA/Dip1
	1	8099	13	0.361156
	2	7344	17	0.520833
	3	9538	17	0.401027
	4	9239	16	0.389653
	5	7700	19	0.555195
	avg			0.445573

## Sheet: Panel F
	Patch Internalization (% internalized)
	WT	Wsp1CA	Dip1	Wsp1CA/Dip1
	100	33.33	100	40
	100	50	75	80
	100	58.33	100	88.89
	93.75	50	90	100
	100	20	80	50
	91.67	12.5	100	50
			100	83.33
			100	33.33
			100	40
			87.5	80
			100	100
			100	83.33
	Measured Values
	Strain	cell #	Total Patches analyzed	internalized	not intern.	%
	WT	1	12	12	0	100
		2	12	12	0	100
		3	10	10	0	100
		4	16	15	1	93.75
		5	10	10	0	100
		6	12	11	1	91.6667
		total	72	70	2	97.2222
	Wsp1CA	1	15	5	10	33.3333
		2	12	6	6	50
		3	12	7	5	58.3333
		4	12	6	6	50
		5	10	2	8	20
		6	8	1	7	12.5
		total	69	27	42	39.1304
	Dip1	1	6	6	0	100
		2	4	3	1	75
		3	3	3	0	100
		4	10	9	1	90
		5	5	4	1	80
		6	5	5	0	100
		7	6	6	0	100
		8	6	6	0	100
		9	8	8	0	100
		10	8	7	1	87.5
		11	3	3	0	100
		12	5	5	0	100
		total	69	65	4	94.2029
	Wsp1CA/Dip1	1	5	2	3	40
		2	5	4	1	80
		3	9	8	1	88.8889
		4	3	3	0	100
		5	4	2	2	50
		6	6	3	3	50
		7	6	5	1	83.3333
		8	6	2	4	33.3333
		9	5	2	3	40
		10	5	4	1	80
		11	5	5	0	100
		12	6	5	1	83.3333
		total	65	45	20	69.2308
